# Supplementary material for: Plasma Cholesterol–Induced Lesion Networks Activated before Regression of Early, Mature, and Advanced Atherosclerosis
Source: PLoS Genet. 2014 Feb 27;10(2):e1004201. doi: 10.1371/journal.pgen.1004201 (PMC3937269; doi:10.1371/journal.pgen.1004201)
Supplement: Table S3 — PCL-responsive genes at week 40. (XLSX) [file pgen.1004201.s005.xlsx]

## Sheet: Sheet1
Table S3. PCL-responsive genes at week 40
Transcript Cluster ID	Gene Title	Gene Symbol	Entrez Gene ID
10525893	acetoacetyl-CoA synthetase	Aacs	78894
10392601	ATP-binding cassette, sub-family A (ABC1), member 6	Abca6	76184
10392522	ATP-binding cassette, sub-family A (ABC1), member 8a	Abca8a	217258
10392484	ATP-binding cassette, sub-family A (ABC1), member 8b	Abca8b	27404
10520154	ATP-binding cassette, sub-family B (MDR/TAP), member 8	Abcb8	74610
10588505	abhydrolase domain containing 14b	Abhd14b	76491
10378893	abhydrolase domain containing 15	Abhd15	67477
10459262	actin binding LIM protein family, member 3	Ablim3	319713
10597592	acetyl-Coenzyme A acyltransferase 1B	Acaa1b	235674
10456699	acetyl-Coenzyme A acyltransferase 2 (mitochondrial 3-oxoacyl-Coenzyme A thiolase)	Acaa2	52538
10379820	acetyl-Coenzyme A carboxylase alpha	Acaca	107476
10394538	acetyl-Coenzyme A carboxylase alpha	Acaca	107476
10524460	acetyl-Coenzyme A carboxylase beta	Acacb	100705
10533367	acyl-Coenzyme A dehydrogenase family, member 10	Acad10	71985
10588357	acyl-Coenzyme A dehydrogenase family, member 11 /// nephronophthisis 3 (adolescent)	Acad11 /// Nphp3	102632 /// 74025
10355246	acyl-Coenzyme A dehydrogenase, long-chain	Acadl	11363
10502951	acyl-Coenzyme A dehydrogenase, medium chain	Acadm	11364
10532926	acyl-Coenzyme A dehydrogenase, short chain	Acads	11409
10593591	acetyl-Coenzyme A acetyltransferase 1	Acat1	110446
10447891	acetyl-Coenzyme A acetyltransferase 2	Acat2	110460
10391146	ATP citrate lyase	Acly	104112
10503966	aconitase 1	Aco1	11428
10425611	aconitase 2, mitochondrial	Aco2	11429
10514865	acyl-CoA thioesterase 11	Acot11	329910
10393177	acyl-Coenzyme A oxidase 1, palmitoyl	Acox1	11430
10399820	acid phosphatase 1, soluble	Acp1	11431
10591739	acid phosphatase 5, tartrate resistant	Acp5	11433
10390032	acyl-CoA synthetase family member 2	Acsf2	264895
10492426	acyl-CoA synthetase family member 2	Acsf2	264895
10576160	acyl-CoA synthetase family member 3	Acsf3	257633
10571657	acyl-CoA synthetase long-chain family member 1	Acsl1	14081
10464045	acyl-CoA synthetase long-chain family member 5	Acsl5	433256
10556769	acyl-CoA synthetase medium-chain family member 3 /// exoribonuclease 2	Acsm3 /// Eri2	20216 /// 71151
10488482	acyl-CoA synthetase short-chain family member 1	Acss1	68738
10477649	acyl-CoA synthetase short-chain family member 2	Acss2	60525
10372208	acyl-CoA synthetase short-chain family member 3	Acss3	380660
10482814	activin A receptor, type IC	Acvr1c	269275
10440522	a disintegrin-like and metallopeptidase (reprolysin type) with thrombospondin type 1 motif, 1	Adamts1	11504
10435388	adenylate cyclase 5	Adcy5	224129
10344725	alcohol dehydrogenase, iron containing, 1	Adhfe1	76187
10434747	adiponectin, C1Q and collagen domain containing	Adipoq	11450
10547386	adiponectin receptor 2	Adipor2	68465
10357878	adenosine A1 receptor	Adora1	11539
10364030	adenosine A2a receptor	Adora2a	11540
10577125	ADP-ribosylhydrolase like 1	Adprhl1	234072
10416099	adrenergic receptor, alpha 1a	Adra1a	11549
10577973	adrenergic receptor, beta 3	Adrb3	11556
10532630	adrenergic receptor kinase, beta 2	Adrbk2	320129
10459534	AFG3(ATPase family gene 3)-like 2 (yeast)	Afg3l2	69597
10481092	1-acylglycerol-3-phosphate O-acyltransferase 2 (lysophosphatidic acid acyltransferase, beta)	Agpat2	67512
10370471	1-acylglycerol-3-phosphate O-acyltransferase 3	Agpat3	28169
10577604	1-acylglycerol-3-phosphate O-acyltransferase 6 (lysophosphatidic acid acyltransferase, zeta)	Agpat6	102247
10523547	1-acylglycerol-3-phosphate O-acyltransferase 9	Agpat9	231510
10566366	expressed sequence AI451617	AI451617	209387
10512251	expressed sequence AI464131	AI464131	329828
10467110	expressed sequence AI747699	AI747699	381236
10604405	apoptosis-inducing factor, mitochondrion-associated 1	Aifm1	26926
10363528	apoptosis-inducing factor, mitochondrion-associated 2	Aifm2	71361
10508382	adenylate kinase 2	Ak2	11637
10389701	A kinase (PRKA) anchor protein 1	Akap1	11640
10395702	A kinase (PRKA) anchor protein 6	Akap6	238161
10403291	aldo-keto reductase family 1, member C14	Akr1c14	105387
10509635	aldo-keto reductase family 7, member A5 (aflatoxin aldehyde reductase)	Akr7a5	110198
10374364	thymoma viral proto-oncogene 2	Akt2	11652
10360506	thymoma viral proto-oncogene 3	Akt3	23797
10513608	aminolevulinate, delta-, dehydratase	Alad	17025
10466624	aldehyde dehydrogenase family 1, subfamily A7	Aldh1a7	26358
10540034	aldehyde dehydrogenase 1 family, member L1	Aldh1l1	107747
10460253	aldehyde dehydrogenase 3 family, member B2	Aldh3b2	621603
10509790	aldehyde dehydrogenase 4 family, member A1	Aldh4a1	212647
10401473	aldehyde dehydrogenase family 6, subfamily A1	Aldh6a1	104776
10539640	Alstrom syndrome 1 homolog (human)	Alms1	236266
10431935	adhesion molecule with Ig like domain 2	Amigo2	105827
10607116	Alport syndrome, mental retardation, midface hypoplasia and elliptocytosis chromosomal region gene 1 homolog (human)	Ammecr1	56068
10501555	amylase 1, salivary	Amy1	11722
10501494	amylase 2a2, pancreatic /// amylase 2a5, pancreatic /// amylase 2b, pancreatic /// amylase 2a1, pancreatic	Amy2a2 /// Amy2a5 /// Amy2b /// Amy2a1	100043688 /// 11723 /// 545562 /// 100043207
10501533	amylase 2a2, pancreatic /// amylase 2a5, pancreatic /// amylase 2b, pancreatic /// amylase 2a1, pancreatic	Amy2a2 /// Amy2a5 /// Amy2b /// Amy2a1	100043688 /// 11723 /// 545562 /// 100043207
10521863	anaphase promoting complex subunit 4	Anapc4	52206
10450038	angiopoietin-like 4	Angptl4	57875
10518526	angiopoietin-like 7	Angptl7	654812
10452516	ankyrin repeat domain 12	Ankrd12	106585
10410756	ankyrin repeat domain 32	Ankrd32	105377
10351056	ankyrin repeat domain 45	Ankrd45	73844
10504730	acidic (leucine-rich) nuclear phosphoprotein 32 family, member B	Anp32b	67628
10494322	acidic (leucine-rich) nuclear phosphoprotein 32 family, member E	Anp32e	66471
10373986	adaptor protein complex AP-1, beta 1 subunit	Ap1b1	11764
10500283	anterior pharynx defective 1a homolog (C. elegans) /// carbonic anhydrase 14	Aph1a /// Car14	226548 /// 23831
10560618	apolipoprotein C-I /// golgi coiled coil 1	Apoc1 /// Gcc1	11812 /// 74375
10600797	apolipoprotein O /// similar to Novel transmembrane domain containing protein /// apolipoprotein O, pseudogene	Apoo /// LOC100044663 /// Apoo-ps	68316 /// 100044663 /// 621156
10418251	adaptor protein, phosphotyrosine interaction, PH domain and leucine zipper containing 1	Appl1	72993
10512145	aquaporin 7	Aqp7	11832
10499080	ADP-ribosylation factor interacting protein 1	Arfip1	99889
10566502	ADP-ribosylation factor interacting protein 2	Arfip2	76932
10455259	Rho GTPase activating protein 26	Arhgap26	71302
10582862	Rho guanine nucleotide exchange factor (GEF) 12 /// Sp140 nuclear body protein	Arhgef12 /// Sp140	69632 /// 434484
10556463	aryl hydrocarbon receptor nuclear translocator-like	Arntl	11865
10587104	cAMP-regulated phosphoprotein 19	Arpp19	59046
10406407	arrestin domain containing 3	Arrdc3	105171
10456018	arylsulfatase i	Arsi	545260
10543067	asparagine synthetase	Asns	27053
10398795	asparaginase homolog (S. cerevisiae)	Aspg	104816
10405047	asporin	Aspn	66695
10435963	autophagy-related 3 (yeast)	Atg3	67841
10604799	ATPase, class VI, type 11C	Atp11c	320940
10438909	ATPase type 13A3	Atp13a3	224088
10560919	ATPase, Na+/K+ transporting, alpha 3 polypeptide	Atp1a3	232975
10456891	ATP synthase, H+ transporting, mitochondrial F1 complex, alpha subunit, isoform 1	Atp5a1	11946
10367106	ATP synthase, H+ transporting mitochondrial F1 complex, beta subunit	Atp5b	11947
10364696	ATP synthase, H+ transporting, mitochondrial F1 complex, delta subunit	Atp5d	66043
10500990	ATP synthase, H+ transporting, mitochondrial F0 complex, subunit b, isoform 1	Atp5f1	11950
10440977	ATP synthase, H+ transporting, mitochondrial F1 complex, O subunit	Atp5o	28080
10386518	ATP synthase mitochondrial F1 complex assembly factor 2	Atpaf2	246782
10580663	expressed sequence AU018778	AU018778	234564
10593361	expressed sequence AU019823	AU019823	270156
10405566	expressed sequence AU042651	AU042651	328258
10454398	expressed sequence AW554918	AW554918	225289
10554129	RIKEN cDNA B130024G19 gene	B130024G19Rik	434198
10437236	RIKEN cDNA B230307C23 gene	B230307C23Rik	245305
10594800	RIKEN cDNA B230380D07 gene	B230380D07Rik	235461
10350473	UDP-Gal:betaGlcNAc beta 1,3-galactosyltransferase, polypeptide 2	B3galt2	26878
10543213	RIKEN cDNA B630005N14 gene	B630005N14Rik	101148
10577858	BCL2-associated athanogene 4	Bag4	67384
10442032	cDNA sequence BC002059	BC002059	213811
10504757	cDNA sequence BC005685	BC005685	352945
10538901	cDNA sequence BC005685	BC005685	352945
10442037	cDNA sequence BC018101 /// zinc finger protein 97 /// cDNA sequence BC002059	BC018101 /// Zfp97 /// BC002059	449000 /// 22759 /// 213811
10382846	cDNA sequence BC018473	BC018473	193217
10476493	cDNA sequence BC034902	BC034902	228642
10478109	cDNA sequence BC054059	BC054059	246747
10526783	cDNA sequence BC055004	BC055004	381680
10552314	cDNA sequence BC063263	BC063263	434178
10561063	branched chain ketoacid dehydrogenase E1, alpha polypeptide	Bckdha	12039
10587534	branched chain ketoacid dehydrogenase E1, beta polypeptide	Bckdhb	12040
10541279	BCL2-like 13 (apoptosis facilitator)	Bcl2l13	94044
10560685	B-cell leukemia/lymphoma 3	Bcl3	12051
10361979	BCL2-associated transcription factor 1	Bclaf1	72567
10549276	basic helix-loop-helix family, member e41	Bhlhe41	79362
10542896	bicaudal D homolog 1 (Drosophila)	Bicd1	12121
10590791	baculoviral IAP repeat-containing 2	Birc2	11797
10523506	bone morphogenetic protein 3	Bmp3	110075
10419261	bone morphogenetic protein 4	Bmp4	12159
10404686	bone morphogenetic protein 6	Bmp6	12161
10607752	BMX non-receptor tyrosine kinase	Bmx	12169
10351304	brain protein 44	Brp44	70456
10461237	Bernardinelli-Seip congenital lipodystrophy 2 homolog (human)	Bscl2	14705
10357875	B-cell translocation gene 2, anti-proliferative	Btg2	12227
10385542	butyrophilin-like 9	Btnl9	237754
10451580	bystin-like	Bysl	53414
10352916	RIKEN cDNA C030002C11 gene	C030002C11Rik	320977
10352918	RIKEN cDNA C030002C11 gene	C030002C11Rik	320977
10415737	C1q and tumor necrosis factor related protein 9	C1qtnf9	239126
10427436	complement component 7	C7	109828
10536056	expressed sequence C87414 /// expressed sequence AA792892 /// predicted gene 3259	C87414 /// AA792892 /// Gm3259	381654 /// 100554 /// 100041296
10360631	chaperone, ABC1 activity of bc1 complex like (S. pombe)	Cabc1	67426
10519855	calcium channel, voltage-dependent, alpha2/delta subunit 1	Cacna2d1	12293
10509568	calcium/calmodulin-dependent protein kinase II inhibitor 1	Camk2n1	66259
10404913	CAP, adenylate cyclase-associated protein, 2 (yeast)	Cap2	67252
10490903	carbonic anhydrase 13	Car13	71934
10379866	carbonic anhydrase 4	Car4	12351
10607738	carbonic anhydrase 5b, mitochondrial	Car5b	56078
10583008	caspase 12	Casp12	12364
10485466	catalase	Cat	12359
10536494	caveolin 2	Cav2	12390
10382022	coiled-coil domain containing 44	Ccdc44	70207
10456545	coiled-coil domain containing 68	Ccdc68	381175
10495574	coiled-coil domain containing 76 /// spindle assembly 6 homolog (C. elegans)	Ccdc76 /// Sass6	229780 /// 72776
10379518	chemokine (C-C motif) ligand 7	Ccl7	20306
10379535	chemokine (C-C motif) ligand 8	Ccl8	20307
10503534	cyclin C	Ccnc	51813
10590631	chemokine (C-C motif) receptor 2	Ccr2	12772
10541644	CD163 antigen	Cd163	93671
10499160	CD1d1 antigen	Cd1d1	12479
10576784	CD209a antigen	Cd209a	170786
10576807	CD209d antigen	Cd209d	170779
10576835	CD209f antigen	Cd209f	69142
10362896	CD24a antigen	Cd24a	12484
10451004	CD2-associated protein	Cd2ap	12488
10381514	CD300 antigen like family member G	Cd300lg	52685
10492964	CD5 antigen-like	Cd5l	11801
10456005	CD74 antigen (invariant polypeptide of major histocompatibility complex, class II antigen-associated)	Cd74	16149
10551025	CD79A antigen (immunoglobulin-associated alpha)	Cd79a	12518
10392142	CD79B antigen	Cd79b	15985
10501629	CDC14 cell division cycle 14 homolog A (S. cerevisiae)	Cdc14a	229776
10423271	cadherin 18	Cdh18	320865
10607619	cyclin-dependent kinase-like 5	Cdkl5	382253
10514347	cyclin-dependent kinase inhibitor 2B (p15, inhibits CDK4)	Cdkn2b	12579
10552140	CCAAT/enhancer binding protein (C/EBP), alpha	Cebpa	12606
10541260	cat eye syndrome chromosome region, candidate 2 homolog (human)	Cecr2	330409
10580635	carboxylesterase 3	Ces3	104158
10406426	centrin 3	Cetn3	12626
10364542	complement factor D (adipsin)	Cfd	11537
10603860	complement factor properdin	Cfp	18636
10364102	coiled-coil-helix-coiled-coil-helix domain containing 10	Chchd10	103172
10543835	coiled-coil-helix-coiled-coil-helix domain containing 3	Chchd3	66075
10601303	cysteine-rich hydrophobic domain 1	Chic1	12212
10540298	cell adhesion molecule with homology to L1CAM	Chl1	12661
10456378	chromatin modifying protein 1B	Chmp1b	67064
10528664	chondroitin polymerizing factor 2 /// SWI/SNF related, matrix associated, actin dependent regulator of chromatin, subfamily d, member 3	Chpf2 /// Smarcd3	100910 /// 66993
10371616	choline phosphotransferase 1	Chpt1	212862
10593713	calcium and integrin binding family member 2	Cib2	56506
10456392	cell death-inducing DNA fragmentation factor, alpha subunit-like effector A	Cidea	12683
10546929	cell death-inducing DFFA-like effector c	Cidec	14311
10433507	class II transactivator	Ciita	12265
10483667	corepressor interacting with RBPJ, 1	Cir1	66935
10521589	corepressor interacting with RBPJ, 1	Cir1	66935
10364712	cold inducible RNA binding protein	Cirbp	12696
10361828	Cbp/p300-interacting transactivator, with Glu/Asp-rich carboxy-terminal domain, 2	Cited2	17684
10400510	C-type lectin domain family 14, member a	Clec14a	66864
10548367	C-type lectin domain family 1, member a	Clec1a	243653
10542181	C-type lectin domain family 9, member a	Clec9a	232414
10555550	ClpB caseinolytic peptidase B homolog (E. coli)	Clpb	20480
10417167	citrate lyase beta like	Clybl	69634
10423505	carboxymethylenebutenolidase-like (Pseudomonas)	Cmbl	69574
10415132	CKLF-like MARVEL transmembrane domain containing 5	Cmtm5	67272
10406852	calponin 3, acidic	Cnn3	71994
10543904	CCR4-NOT transcription complex, subunit 4	Cnot4	53621
10381226	Coenzyme A synthase	Coasy	71743
10438340	catechol-O-methyltransferase 1	Comt1	12846
10346298	coenzyme Q10 homolog B (S. cerevisiae)	Coq10b	67876
10524668	coenzyme Q5 homolog, methyltransferase (yeast)	Coq5	52064
10397216	coenzyme Q6 homolog (yeast)	Coq6	217707
10574232	coenzyme Q9 homolog (yeast)	Coq9	67914
10585706	cytochrome c oxidase, subunit Va	Cox5a	12858
10345504	cytochrome c oxidase, subunit Vb	Cox5b	12859
10551836	cytochrome c oxidase, subunit VIIa 1	Cox7a1	12865
10569008	cytochrome c oxidase, subunit VIIIb	Cox8b	12869
10431564	carnitine palmitoyltransferase 1b, muscle /// choline kinase beta, carnitine palmitoyltransferase 1b, muscle transcription unit	Cpt1b /// Chkb-cpt1b	12895 /// 100134861
10514933	carnitine palmitoyltransferase 2	Cpt2	12896
10481474	carnitine acetyltransferase	Crat	12908
10426098	cysteine-rich with EGF-like domains 2	Creld2	76737
10476383	cardiolipin synthase 1	Crls1	66586
10371400	cryptochrome 1 (photolyase-like)	Cry1	12952
10367292	citrate synthase	Cs	12974
10432939	cysteine sulfinic acid decarboxylase	Csad	246277
10372116	citrate synthase like	Csl	71832
10428511	CUB and Sushi multiple domains 3	Csmd3	239420
10344817	centrosome and spindle pole associated protein 1	Cspp1	211660
10366293	cysteine and glycine-rich protein 2	Csrp2	13008
10471058	CSA-conditional, T cell activation-dependent protein	Cstad	78617
10475394	CTD (carboxy-terminal domain, RNA polymerase II, polypeptide A) small phosphatase like 2	Ctdspl2	329506
10467368	CTD (carboxy-terminal domain, RNA polymerase II, polypeptide A) small phosphatase like 2 /// predicted gene 3875 /// predicted gene, EG235855	Ctdspl2 /// Gm3875 /// EG235855	329506 /// 100042507 /// 235855
10489569	cathepsin A /// phospholipid transfer protein	Ctsa /// Pltp	19025 /// 18830
10582941	CWF19-like 2, cell cycle control (S. pombe)	Cwf19l2	244672
10436608	coxsackie virus and adenovirus receptor	Cxadr	13052
10392056	cytochrome b-561	Cyb561	13056
10511725	cytochrome b5 reductase 4	Cyb5r4	266690
10424825	cytochrome c-1	Cyc1	66445
10551197	cytochrome P450, family 2, subfamily b, polypeptide 10	Cyp2b10	13088
10502214	cytochrome P450, family 2, subfamily u, polypeptide 1	Cyp2u1	71519
10445308	cytochrome P450, family 39, subfamily a, polypeptide 1	Cyp39a1	56050
10399680	cystin 1	Cys1	12879
10527233	cytohesin 3	Cyth3	19159
10458046	DNA segment, human D4S114	D0H4S114	27528
10370413	DNA segment, Chr 10, Johns Hopkins University 81 expressed	D10Jhu81e	28295
10357242	diazepam binding inhibitor	Dbi	13167
10553092	D site albumin promoter binding protein	Dbp	13170
10436372	discoidin, CUB and LCCL domain containing 2	Dcbld2	73379
10442445	dodecenoyl-Coenzyme A delta isomerase (3,2 trans-enoyl-Coenyme A isomerase)	Dci	13177
10578138	dynactin 6	Dctn6	22428
10577838	DDHD domain containing 2	Ddhd2	72108
10599696	DEAD/H (Asp-Glu-Ala-Asp/His) box polypeptide 26B	Ddx26b	236790
10546760	DEAD/H (Asp-Glu-Ala-Asp/His) box polypeptide 3, X-linked	Ddx3x	13205
10511679	2,4-dienoyl CoA reductase 1, mitochondrial	Decr1	67460
10409031	DEK oncogene (DNA binding)	Dek	110052
10586244	DENN/MADD domain containing 4A	Dennd4a	102442
10586246	DENN/MADD domain containing 4A	Dennd4a	102442
10586252	DENN/MADD domain containing 4A	Dennd4a	102442
10428736	Der1-like domain family, member 1	Derl1	67819
10429926	diacylglycerol O-acyltransferase 1	Dgat1	13350
10565775	diacylglycerol O-acyltransferase 2	Dgat2	67800
10559312	7-dehydrocholesterol reductase	Dhcr7	13360
10563314	dihydrodiol dehydrogenase (dimeric)	Dhdh	71755
10400941	dehydrogenase/reductase (SDR family) member 7	Dhrs7	66375
10376726	dehydrogenase/reductase (SDR family) member 7B	Dhrs7b	216820
10601616	diaphanous homolog 2 (Drosophila)	Diap2	54004
10403464	DIP2 disco-interacting protein 2 homolog C (Drosophila)	Dip2c	208440
10593367	dihydrolipoamide S-acetyltransferase (E2 component of pyruvate dehydrogenase complex)	Dlat	235339
10397311	dihydrolipoamide S-succinyltransferase (E2 component of 2-oxo-glutarate complex)	Dlst	78920
10600604	dystrophin, muscular dystrophy	Dmd	13405
10580370	DnaJ (Hsp40) homolog, subfamily A, member 2	Dnaja2	56445
10433278	DnaJ (Hsp40) homolog, subfamily A, member 3	Dnaja3	83945
10395976	DnaJ (Hsp40) homolog, subfamily B, member 6	Dnajb6	23950
10481868	DnaJ (Hsp40) homolog, subfamily B, member 6	Dnajb6	23950
10585533	DnaJ (Hsp40) homolog, subfamily B, member 6	Dnajb6	23950
10480329	DnaJ (Hsp40) homolog, subfamily C, member 1	Dnajc1	13418
10473190	DnaJ (Hsp40) homolog, subfamily C, member 10	Dnajc10	66861
10596279	DnaJ (Hsp40) homolog, subfamily C, member 13	Dnajc13	235567
10421723	DnaJ (Hsp40) homolog, subfamily C, member 15	Dnajc15	66148
10440926	DnaJ (Hsp40) homolog, subfamily C, member 28	Dnajc28	246738
10508727	DnaJ (Hsp40) homolog, subfamily C, member 8	Dnajc8	68598
10397179	dynein, axonemal, light chain 1	Dnalc1	105000
10351111	dynamin 3, opposite strand	Dnm3os	474332
10356020	dedicator of cytokinesis 10	Dock10	210293
10495625	dihydropyrimidine dehydrogenase	Dpyd	99586
10357115	dermatan sulfate epimerase-like	Dsel	319901
10454254	dystrobrevin alpha	Dtna	13527
10526427	deltex 2 homolog (Drosophila)	Dtx2	74198
10449284	dual specificity phosphatase 1	Dusp1	19252
10571312	dual specificity phosphatase 4	Dusp4	319520
10387768	dishevelled 2, dsh homolog (Drosophila) /// acyl-Coenzyme A dehydrogenase, very long chain	Dvl2 /// Acadvl	13543 /// 11370
10590690	dynein cytoplasmic 2 heavy chain 1	Dync2h1	110350
10603567	dynein light chain Tctex-type 3	Dynlt3	67117
10410388	RIKEN cDNA E430024C06 gene	E430024C06Rik	319443
10414262	eosinophil-associated, ribonuclease A family, member 2	Ear2	13587
10568735	early B-cell factor 3	Ebf3	13593
10551614	enoyl coenzyme A hydratase 1, peroxisomal	Ech1	51798
10368486	enoyl Coenzyme A hydratase domain containing 1 /// ring finger protein 146	Echdc1 /// Rnf146	52665 /// 68031
10479938	enoyl Coenzyme A hydratase domain containing 3	Echdc3	67856
10568939	enoyl Coenzyme A hydratase, short chain, 1, mitochondrial	Echs1	93747
10405033	extracellular matrix protein 2, female organ and adipocyte specific	Ecm2	407800
10591726	ECSIT homolog (Drosophila)	Ecsit	26940
10557009	eukaryotic elongation factor-2 kinase	Eef2k	13631
10557033	eukaryotic elongation factor-2 kinase	Eef2k	13631
10452419	ephrin A5	Efna5	13640
10600936	ephrin B1	Efnb1	13641
10384622	EH domain binding protein 1	Ehbp1	216565
10438575	enoyl-Coenzyme A, hydratase/3-hydroxyacyl Coenzyme A dehydrogenase	Ehhadh	74147
10492205	eukaryotic translation initiation factor 2a	Eif2a	229317
10488806	eukaryotic translation initiation factor 2, subunit 2 (beta)	Eif2s2	67204
10428398	eukaryotic translation initiation factor 3, subunit E	Eif3e	16341
10458680	eukaryotic translation initiation factor 3, subunit J	Eif3j	78655
10491182	eukaryotic translation initiation factor 5A2	Eif5a2	208691
10354085	eukaryotic translation initiation factor 5B /// REV1 homolog (S. cerevisiae)	Eif5b /// Rev1	226982 /// 56210
10403842	engulfment and cell motility 1, ced-12 homolog (C. elegans)	Elmo1	140580
10463551	elongation of very long chain fatty acids (FEN1/Elo2, SUR4/Elo3, yeast)-like 3	Elovl3	12686
10495993	ELOVL family member 6, elongation of long chain fatty acids (yeast)	Elovl6	170439
10496872	EGF, latrophilin seven transmembrane domain containing 1	Eltd1	170757
10496359	endomucin	Emcn	59308
10360764	enabled homolog (Drosophila)	Enah	13800
10510546	enolase 1, alpha non-neuron	Eno1	13806
10455595	enolase 1, alpha non-neuron /// predicted gene 4735 /// predicted gene 5506	Eno1 /// Gm4735 /// Gm5506	13806 /// 103324 /// 433182
10473240	enolase 1, alpha non-neuron /// predicted gene 4735 /// predicted gene 5506	Eno1 /// Gm4735 /// Gm5506	13806 /// 103324 /// 433182
10451054	ectonucleotide pyrophosphatase/phosphodiesterase 4	Enpp4	224794
10463070	ectonucleoside triphosphate diphosphohydrolase 1	Entpd1	12495
10401454	ectonucleoside triphosphate diphosphohydrolase 5	Entpd5	12499
10476952	ectonucleoside triphosphate diphosphohydrolase 6	Entpd6	12497
10440258	Eph receptor A3	Epha3	13837
10360684	epoxide hydrolase 1, microsomal	Ephx1	13849
10420935	epoxide hydrolase 2, cytoplasmic	Ephx2	13850
10510574	ERBB receptor feedback inhibitor 1	Errfi1	74155
10488108	ESF1, nucleolar pre-rRNA processing protein, homolog (S. cerevisiae)	Esf1	66580
10465485	estrogen related receptor, alpha	Esrra	26379
10399061	extended synaptotagmin-like protein 2	Esyt2	52635
10552418	electron transferring flavoprotein, beta polypeptide	Etfb	110826
10498837	electron transferring flavoprotein, dehydrogenase	Etfdh	66841
10395457	ets variant gene 1	Etv1	14009
10371502	fatty acid binding protein 3, muscle and heart	Fabp3	14077
10508614	fatty acid binding protein 3, muscle and heart	Fabp3	14077
10497265	fatty acid binding protein 4, adipocyte	Fabp4	11770
10461423	fatty acid desaturase 3	Fads3	60527
10565315	fumarylacetoacetate hydrolase	Fah	14085
10388488	family with sequence similarity 101, member B	Fam101b	76566
10584758	family with sequence similarity 103, member A1	Fam103a1	67148
10417561	family with sequence similarity 107, member A	Fam107a	268709
10350630	family with sequence similarity 129, member A	Fam129a	63913
10391348	family with sequence similarity 134, member C	Fam134c	67998
10353549	family with sequence similarity 135, member A	Fam135a	68187
10490802	family with sequence similarity 164, member A	Fam164a	67306
10473312	family with sequence similarity 171, member B	Fam171b	241520
10423512	family with sequence similarity 173, member B	Fam173b	68073
10463404	family with sequence similarity 178, member A	Fam178a	226151
10540233	family with sequence similarity 19, member A1	Fam19a1	320265
10379989	family with sequence similarity 33, member A	Fam33a	66140
10434932	family with sequence similarity 43, member A	Fam43a	224093
10595402	family with sequence similarity 46, member A	Fam46a	212943
10557498	family with sequence similarity 57, member B	Fam57b	68952
10470298	family with sequence similarity 69, member B	Fam69b	56279
10471018	family with sequence similarity 73, member B	Fam73b	108958
10594762	family with sequence similarity 81, member A	Fam81a	76886
10486172	family with sequence similarity 82, member A2	Fam82a2	67809
10511617	family with sequence similarity 92, member A	Fam92a	68099
10393970	fatty acid synthase	Fasn	14104
10409999	fructose bisphosphatase 2	Fbp2	14120
10427904	F-box and leucine-rich repeat protein 7	Fbxl7	448987
10500335	Fc receptor, IgG, high affinity I	Fcgr1	14129
10411464	FCH domain only 2	Fcho2	218503
10499189	Fc receptor-like S, scavenger receptor	Fcrls	80891
10562117	free fatty acid receptor 2	Ffar2	233079
10604751	fibroblast growth factor 13	Fgf13	14168
10519983	fibrinogen-like protein 2	Fgl2	14190
10360443	fumarate hydratase 1	Fh1	14194
10485711	fin bud initiation factor homolog (zebrafish)	Fibin	67606
10489368	fat storage-inducing transmembrane protein 2 /// RIKEN cDNA 2310001K24 gene	Fitm2 /// 2310001K24Rik	228859 /// 69517
10449452	FK506 binding protein 5	Fkbp5	14229
10386427	folliculin	Flcn	216805
10359582	flavin containing monooxygenase 2	Fmo2	55990
10359593	flavin containing monooxygenase 3	Fmo3	14262
10565401	folate hydrolase	Folh1	53320
10404407	forkhead box C1	Foxc1	17300
10402063	forkhead box N3	Foxn3	71375
10592114	FAD-dependent oxidoreductase domain containing 1	Foxred1	235169
10509113	FUS interacting protein (serine-arginine rich) 1	Fusip1	14105
10521984	glucose-6-phosphate dehydrogenase 2	G6pd2	14380
10605338	glucose-6-phosphate dehydrogenase X-linked	G6pdx	14381
10604961	gamma-aminobutyric acid (GABA) A receptor, subunit alpha 3	Gabra3	14396
10348902	galactose-3-O-sulfotransferase 2 /// predicted gene 6086	Gal3st2 /// Gm6086	381334 /// 619597
10509147	galactose-4-epimerase, UDP	Gale	74246
10454310	UDP-N-acetyl-alpha-D-galactosamine:polypeptide N-acetylgalactosaminyltransferase 1	Galnt1	14423
10413813	UDP-N-acetyl-alpha-D-galactosamine:polypeptide N-acetylgalactosaminyltransferase-like 2	Galntl2	78754
10496539	guanylate binding protein 5	Gbp5	229898
10466521	glucosaminyl (N-acetyl) transferase 1, core 2	Gcnt1	14537
10395273	ganglioside-induced differentiation-associated-protein 10	Gdap10	14546
10414025	growth differentiation factor 10	Gdf10	14560
10492480	G elongation factor, mitochondrial 1	Gfm1	28030
10406795	G elongation factor, mitochondrial 2	Gfm2	320806
10468722	glial cell line derived neurotrophic factor family receptor alpha 1	Gfra1	14585
10419038	growth hormone inducible transmembrane protein	Ghitm	66092
10409660	G kinase anchoring protein 1	Gkap1	56278
10354472	glutaminase	Gls	14660
10499108	glycosyltransferase 28 domain containing 2	Glt28d2	320302
10371296	glycosyltransferase 8 domain containing 2	Glt8d2	74782
10479973	predicted gene 10115	Gm10115	791270
10455210	predicted gene 10268 /// ribosomal protein L17 /// predicted gene 10362 /// ribosomal protein L17 pseudogene	Gm10268 /// Rpl17 /// Gm10362 /// Gm10164	100042583 /// 319195 /// 100040929 /// 100040745
10513737	predicted gene 10268 /// ribosomal protein L17 /// predicted gene 10362 /// ribosomal protein L17 pseudogene	Gm10268 /// Rpl17 /// Gm10362 /// Gm10164	100042583 /// 319195 /// 100040929 /// 100040745
10371275	predicted gene 10335 /// predicted gene 8290 /// predicted gene 3940 /// predicted gene 6177 /// ribosomal protein L23a	Gm10335 /// Gm8290 /// Gm3940 /// Gm6177 /// Rpl23a	100039571 /// 666790 /// 100042634 /// 620750 /// 268449
10379344	predicted gene 10387	Gm10387	100038730
10542592	predicted gene 10400	Gm10400	100093700
10524060	predicted gene 10417	Gm10417	100038428
10453759	predicted gene 10554	Gm10554	100038541
10512352	predicted gene 10590 /// RIKEN cDNA 4933409K07 gene	Gm10590 /// 4933409K07Rik	545614 /// 108816
10586602	predicted gene 10647	Gm10647	100038381
10436890	predicted gene 10785	Gm10785	100038392
10408935	predicted gene 10786	Gm10786	100038539
10479971	predicted gene 10855	Gm10855	100038708
10515113	predicted gene 11847 /// heterogeneous nuclear ribonucleoprotein A3	Gm11847 /// Hnrnpa3	545592 /// 229279
10600593	predicted gene 11847 /// heterogeneous nuclear ribonucleoprotein A3	Gm11847 /// Hnrnpa3	545592 /// 229279
10513186	predicted gene 12538	Gm12538	619973
10373740	predicted gene 12592 /// phosphoinositide-3-kinase interacting protein 1	Gm12592 /// Pik3ip1	791413 /// 216505
10373452	predicted gene 129	Gm129	229599
10500272	predicted gene 129	Gm129	229599
10510150	predicted gene 13212 /// predicted gene 13154	Gm13212 /// Gm13154	433801 /// 433804
10510178	predicted gene 13235 /// predicted gene 13225 /// predicted gene 13212 /// predicted gene 13251 /// predicted gene 13051 /// predicted gene 13151 /// predicted gene 13154 /// predicted gene 13159 /// predicted gene 13157 /// reduced expression 2	Gm13235 /// Gm13225 /// Gm13212 /// Gm13251 /// Gm13051 /// Gm13151 /// Gm13154 /// Gm13159 /// Gm13157 /// Rex2	385211 /// 622846 /// 433801 /// 433791 /// 626316 /// 666581 /// 433804 /// 100043100 /// 100041677 /// 19715
10490250	predicted gene 14295 /// RIKEN cDNA 2810021G02 gene /// predicted gene, OTTMUSG00000016609 /// predicted gene 14434 /// similar to zinc finger protein 14 /// RIKEN cDNA 0610010B08 gene /// RIKEN cDNA 3100002L24 gene	Gm14295 /// 2810021G02Rik /// OTTMUSG00000016609 /// Gm14434 /// LOC627901 /// 0610010B08Rik /// 3100002L24Rik	100039123 /// 353208 /// 668030 /// 668039 /// 627901 /// 100039060 /// 626832
10490294	predicted gene 14418 /// predicted gene 14403 /// predicted gene 14322 /// predicted gene 14325 /// RIKEN cDNA 3100002L24 gene /// ethanol induced 1 /// RIKEN cDNA 2810021G02 gene /// predicted gene, OTTMUSG00000016609 /// predicted gene 14434 /// RIKEN cDNA 0610010B08 gene	Gm14418 /// Gm14403 /// Gm14322 /// Gm14325 /// 3100002L24Rik /// Etohi1 /// 2810021G02Rik /// OTTMUSG00000016609 /// Gm14434 /// 0610010B08Rik	668066 /// 433520 /// 626802 /// 329575 /// 626832 /// 626848 /// 353208 /// 668030 /// 668039 /// 100039060
10479217	predicted gene 14420	Gm14420	628308
10568532	ribosomal protein L7a pseudogene /// ribosomal protein L7a pseudogene /// predicted gene 4978 /// predicted gene 5619 /// ribosomal protein L7a pseudogene /// similar to ribosomal protein L7a /// ribosomal protein L7A	Gm16375 /// Gm5044 /// Gm4978 /// Gm5619 /// Gm6347 /// LOC677073 /// Rpl7a	674419 /// 268795 /// 244913 /// 434426 /// 622727 /// 677073 /// 27176
10357478	ribosomal protein L31 pseudogene /// predicted gene 10072 /// ribosomal protein L31 /// ERO1-like (S. cerevisiae)	Gm16382 /// Gm10072 /// Rpl31 /// Ero1l	673582 /// 100043192 /// 114641 /// 50527
10401924	ribosomal protein L31 pseudogene /// ribosomal protein L31 pseudogene /// predicted gene 10072 /// ribosomal protein L31	Gm16382 /// Gm5437 /// Gm10072 /// Rpl31	673582 /// 432681 /// 100043192 /// 114641
10451547	predicted gene 16494	Gm16494	100043385
10472197	predicted gene 3550 /// predicted gene 4945 /// ribosomal protein L29 pseudogene /// predicted gene 6344 /// ribosomal protein L29	Gm3550 /// Gm4945 /// Gm5443 /// Gm6344 /// Rpl29	100041859 /// 240110 /// 432721 /// 622707 /// 19944
10476441	predicted gene 3550 /// ribosomal protein L29 pseudogene /// predicted gene 6344 /// ribosomal protein L29	Gm3550 /// Gm5443 /// Gm6344 /// Rpl29	100041859 /// 432721 /// 622707 /// 19944
10428576	predicted gene 4294 /// ribosomal protein L15	Gm4294 /// Rpl15	100043209 /// 66480
10547638	predicted gene 4294 /// ribosomal protein L15	Gm4294 /// Rpl15	100043209 /// 66480
10530013	predicted gene 447	Gm447	242997
10365288	predicted gene 4799 /// TAF10 RNA polymerase II, TATA box binding protein (TBP)-associated factor	Gm4799 /// Taf10	216185 /// 24075
10458757	mortality factor 4 like 1 pseudogene /// mortality factor 4 like 1	Gm4835 /// Morf4l1	225228 /// 21761
10455954	predicted gene 4951	Gm4951	240327
10538271	predicted gene 5301 /// predicted gene 4782	Gm5301 /// Gm4782	384356 /// 213320
10389229	predicted gene 5451 /// ribosomal protein L9 pseudogene /// ribosomal protein L9	Gm5451 /// Gm9822 /// Rpl9	432768 /// 100040021 /// 20005
10406934	predicted gene 5454 /// ets variant gene 1	Gm5454 /// Etv1	432800 /// 14009
10606575	ribosomal protein S12 pseudogene /// predicted gene 10063 /// ribosomal protein S12	Gm5462 /// Gm10063 /// Rps12	432865 /// 671641 /// 20042
10585097	predicted gene 5617	Gm5617	434402
10394837	predicted gene 5784 /// similar to development and differentiation enhancing factor 2 /// predicted gene 9306 /// RIKEN cDNA 2410018L13 gene	Gm5784 /// LOC100043371 /// Gm9306 /// 2410018L13Rik	544848 /// 100043371 /// 668698 /// 69732
10455957	predicted gene 5970	Gm5970	546714
10344622	predicted gene 6123	Gm6123	620009
10401837	predicted gene 6190	Gm6190	620915
10583753	predicted gene 6484	Gm6484	624219
10452978	eukaryotic translation elongation factor 1 alpha 1 pseudogene	Gm6548	625054
10349100	predicted gene 6651	Gm6651	626075
10442052	predicted gene 6712	Gm6712	626854
10584350	tumor protein, translationally-controlled 1pseudogene /// tumor protein, translationally-controlled 1 /// tumor protein, translationally-controlled 1 pseudogene	Gm6790 /// Tpt1 /// Tpt1p	627798 /// 22070 /// 497210
10366301	predicted gene 6807 /// ribosomal protein L6 /// ribosomal protein L6 pseudogene	Gm6807 /// Rpl6 /// Gm7027	627889 /// 19988 /// 630138
10421573	predicted gene 6901 /// chromobox homolog 3 (Drosophila HP1 gamma)	Gm6901 /// Cbx3	628648 /// 12417
10403023	predicted gene 7016	Gm7016	629908
10405733	predicted gene 7036 /// RIKEN cDNA 6720457D02 gene	Gm7036 /// 6720457D02Rik	630579 /// 77117
10409978	predicted gene 7036 /// RIKEN cDNA 8430426H19 gene /// RIKEN cDNA 6720457D02 gene /// RIKEN cDNA 6720489N17 gene /// predicted gene 3604	Gm7036 /// 8430426H19Rik /// 6720457D02Rik /// 6720489N17Rik /// Gm3604	630579 /// 71508 /// 77117 /// 211378 /// 100041979
10591773	high mobility group nucleosomal binding domain 2 pseudogene /// high mobility group nucleosomal binding domain 2	Gm7125 /// Hmgn2	633752 /// 15331
10349832	predicted gene 7246	Gm7246	638636
10526654	predicted gene 7285	Gm7285	640050
10424347	predicted gene 7691	Gm7691	665565
10420986	ribosomal protein L21 pseudogene /// predicted gene 5528 /// ribosomal protein L21	Gm7806 /// Gm5528 /// Rpl21	665821 /// 433319 /// 19933
10601863	predicted gene 7966	Gm7966	666180
10346328	predicted gene 8292	Gm8292	666793
10550765	predicted gene 8519 /// predicted gene 8650 /// vomeronasal 1 receptor, D14	Gm8519 /// Gm8650 /// V1rd14	667215 /// 667469 /// 81011
10393406	predicted gene 8624	Gm8624	667423
10601581	predicted gene 8833 /// RIKEN cDNA 9230105E10 gene /// predicted gene 4992	Gm8833 /// 9230105E10Rik /// Gm4992	667823 /// 319236 /// 245575
10566333	predicted gene 8833 /// tripartite motif-containing 12 /// RIKEN cDNA 9230105E10 gene /// similar to tripartite motif protein TRIM5 /// predicted gene 4992	Gm8833 /// Trim12 /// 9230105E10Rik /// LOC675296 /// Gm4992	667823 /// 76681 /// 319236 /// 675296 /// 245575
10433177	predicted gene 9108	Gm9108	668327
10463904	predicted gene 9228	Gm9228	668536
10394816	predicted gene 9237 /// predicted gene 9282 /// predicted gene 9309 /// similar to Hippocalcin-like protein 1 (Visinin-like protein 3) (VILIP-3) (Neural visinin-like protein 3) (NVL-3) (NVP-3)	Gm9237 /// Gm9282 /// Gm9309 /// LOC677548	668553 /// 668645 /// 668701 /// 677548
10399666	predicted gene 9257 /// similar to development and differentiation enhancing factor 2 /// RIKEN cDNA 9030624G23 gene	Gm9257 /// LOC100043371 /// 9030624G23Rik	668588 /// 100043371 /// 66808
10360912	predicted gene 9722	Gm9722	677785
10497345	predicted gene 9733	Gm9733	751864
10394674	suppressor of cytokine signaling 2 pseudogene /// suppressor of cytokine signaling 2	Gm9847 /// Socs2	100043256 /// 216233
10578683	predicted gene 9892 /// eukaryotic translation initiation factor 2, subunit 2 (beta)	Gm9892 /// Eif2s2	100040220 /// 67204
10592186	predicted gene 9896	Gm9896	791291
10424126	predicted gene 9920 /// DEP domain containing 6	Gm9920 /// Depdc6	791337 /// 97998
10576506	glyceronephosphate O-acyltransferase	Gnpat	14712
10498775	golgi integral membrane protein 4	Golim4	73124
10468533	glycerol-3-phosphate acyltransferase, mitochondrial	Gpam	14732
10391746	G patch domain containing 8	Gpatch8	237943
10412082	GC-rich promoter binding protein 1	Gpbp1	73274
10426812	glycerol-3-phosphate dehydrogenase 1 (soluble)	Gpd1	14555
10472162	glycerol phosphate dehydrogenase 2, mitochondrial	Gpd2	14571
10424695	GPI-anchored HDL-binding protein 1	Gpihbp1	68453
10462881	G protein-coupled receptor 120	Gpr120	107221
10483679	G protein-coupled receptor 155	Gpr155	68526
10351298	G protein-coupled receptor 161	Gpr161	240888
10424922	G protein-coupled receptor 172B	Gpr172b	52710
10471814	G protein-coupled receptor 21	Gpr21	338346
10533725	G protein-coupled receptor 81	Gpr81	243270
10567355	G protein-coupled receptor, family C, group 5, member B	Gprc5b	64297
10424979	glutamic pyruvic transaminase, soluble	Gpt	76282
10376201	glutathione peroxidase 3	Gpx3	14778
10363000	glutathione peroxidase 4	Gpx4	625249
10364675	glutathione peroxidase 4	Gpx4	625249
10376245	glutamate receptor, ionotropic, AMPA1 (alpha 1)	Gria1	14799
10590663	glutamate receptor, ionotropic, AMPA4 (alpha 4)	Gria4	14802
10528145	glutamate receptor, metabotropic 3	Grm3	108069
10587315	glutathione S-transferase, alpha 4	Gsta4	14860
10534253	general transcription factor II I repeat domain-containing 1	Gtf2ird1	57080
10582958	guanylate cyclase 1, soluble, alpha 2	Gucy1a2	234889
10498935	guanylate cyclase 1, soluble, beta 3	Gucy1b3	54195
10346000	GULP, engulfment adaptor PTB domain containing 1	Gulp1	70676
10458028	glycophorin C	Gypc	71683
10549079	glycogen synthase 2	Gys2	232493
10450154	histocompatibility 2, class II antigen A, alpha	H2-Aa	14960
10444291	histocompatibility 2, class II antigen A, beta 1	H2-Ab1	14961
10444229	histocompatibility 2, class II, locus DMa	H2-DMa	14998
10444236	histocompatibility 2, class II, locus Mb2 /// histocompatibility 2, class II, locus Mb1	H2-DMb2 /// H2-DMb1	15000 /// 14999
10444298	histocompatibility 2, class II antigen E beta	H2-Eb1	14969
10444841	histocompatibility 2, Q region locus 10	H2-Q10	15007
10362974	HECT domain and ankyrin repeat containing, E3 ubiquitin protein ligase 1	Hace1	209462
10502205	hydroxyacyl-Coenzyme A dehydrogenase	Hadh	15107
10528929	hydroxyacyl-Coenzyme A dehydrogenase/3-ketoacyl-Coenzyme A thiolase/enoyl-Coenzyme A hydratase (trifunctional protein), alpha subunit	Hadha	97212
10520467	hydroxyacyl-Coenzyme A dehydrogenase/3-ketoacyl-Coenzyme A thiolase/enoyl-Coenzyme A hydratase (trifunctional protein), beta subunit	Hadhb	231086
10448117	hyaluronan synthase1	Has1	15116
10472782	histone aminotransferase 1	Hat1	107435
10554463	HD domain containing 3	Hddc3	68695
10596652	HemK methyltransferase family member 1	Hemk1	69536
10368556	hairy/enhancer-of-split related with YRPW motif 2	Hey2	15214
10579894	Hedgehog-interacting protein	Hhip	15245
10486754	histidine acid phosphatase domain containing 2A	Hisppd2a	327655
10404026	histone cluster 1, H2ak /// histone cluster 1, H2ah /// histone cluster 1, H2af /// histone cluster 1, H2ag /// histone cluster 1, H2an /// histone cluster 1, H2ao /// histone cluster 1, H2ad /// histone cluster 1, H2ai /// similar to histone 2a	Hist1h2ak /// Hist1h2ah /// Hist1h2af /// Hist1h2ag /// Hist1h2an /// Hist1h2ao /// Hist1h2ad /// Hist1h2ai /// RP23-480B19.10	319169 /// 319168 /// 319173 /// 319167 /// 319170 /// 319171 /// 319165 /// 319191 /// 665433
10408070	histone cluster 1, H2bm /// histone cluster 1, H2bk /// histone cluster 1, H2bh /// histone cluster 1, H2bc /// histone cluster 1, H2bf /// histone cluster 1, H2bj /// histone cluster 1, H2bn /// histone cluster 1, H2be /// histone cluster 1, H2bl /// predicted gene, OTTMUSG00000013203 /// H2b histone family member	Hist1h2bm /// Hist1h2bk /// Hist1h2bh /// Hist1h2bc /// Hist1h2bf /// Hist1h2bj /// Hist1h2bn /// Hist1h2be /// Hist1h2bl /// RP23-38E20.1 /// LOC665622	319186 /// 319184 /// 319182 /// 68024 /// 319180 /// 319183 /// 319187 /// 319179 /// 319185 /// 665596 /// 665622
10545588	hexokinase 2	Hk2	15277
10389786	hepatic leukemia factor	Hlf	217082
10358585	hemicentin 1	Hmcn1	545370
10429455	high-mobility group (nonhistone chromosomal) protein 1-like 1 /// high mobility group box 1	Hmg1l1 /// Hmgb1	434174 /// 15289
10453252	high-mobility group (nonhistone chromosomal) protein 1-like 1 /// high mobility group box 1	Hmg1l1 /// Hmgb1	434174 /// 15289
10565589	high-mobility group (nonhistone chromosomal) protein 1-like 1 /// high mobility group box 1	Hmg1l1 /// Hmgb1	434174 /// 15289
10402750	high mobility group box 1	Hmgb1	15289
10604663	high mobility group box 1	Hmgb1	15289
10552337	high mobility group box 1-like /// high-mobility group (nonhistone chromosomal) protein 1-like 1 /// high mobility group box 1	Hmgb1l /// Hmg1l1 /// Hmgb1	625781 /// 434174 /// 15289
10497483	high mobility group box 1-like /// high mobility group box 1	Hmgb1l /// Hmgb1	625781 /// 15289
10548600	high mobility group box 1-like /// high mobility group box 1	Hmgb1l /// Hmgb1	625781 /// 15289
10571870	high mobility group box 2	Hmgb2	97165
10412466	3-hydroxy-3-methylglutaryl-Coenzyme A synthase 1	Hmgcs1	208715
10595371	high mobility group nucleosomal binding domain 3	Hmgn3	94353
10417411	hematological and neurological expressed 1-like /// RIKEN cDNA B930046C15 gene /// predicted gene, 544988 /// predicted gene, ENSMUSG00000072735 /// alpha7-takusan /// predicted gene, ENSMUSG00000063277 /// predicted gene 3020 /// predicted gene 3242 /// hypothetical protein LOC671957 /// hypothetical LOC100036568 /// predicted gene, ENSMUSG00000079376	Hn1l /// B930046C15Rik /// 544988 /// ENSMUSG00000072735 /// LOC100038847 /// ENSMUSG00000063277 /// Gm3020 /// Gm3242 /// LOC671957 /// LOC100036568 /// ENSMUSG00000079376	52009 /// 544998 /// 544988 /// 100041151 /// 100038847 /// 545015 /// 100040880 /// 100041268 /// 671957 /// 100036568 /// 545001
10597969	heterogeneous nuclear ribonucleoprotein A1 /// heterogeneous nuclear ribonucleoprotein A1 pseudogene	Hnrnpa1 /// Gm10052	15382 /// 654467
10427310	heterogeneous nuclear ribonucleoprotein A1 /// heterogeneous nuclear ribonucleoprotein A1 pseudogene /// heterogeneous nuclear ribonucleoprotein A1 pseudogene	Hnrnpa1 /// Gm5643 /// Gm10052	15382 /// 434858 /// 654467
10427885	heterogeneous nuclear ribonucleoprotein A1 /// heterogeneous nuclear ribonucleoprotein A1 pseudogene /// heterogeneous nuclear ribonucleoprotein A1 pseudogene	Hnrnpa1 /// Gm5643 /// Gm10052	15382 /// 434858 /// 654467
10602173	heterogeneous nuclear ribonucleoprotein A1 /// heterogeneous nuclear ribonucleoprotein A1 pseudogene /// heterogeneous nuclear ribonucleoprotein A1 pseudogene	Hnrnpa1 /// Gm5643 /// Gm10052	15382 /// 434858 /// 654467
10406226	heterogeneous nuclear ribonucleoprotein A1-like 2 /// similar to Heterogeneous nuclear ribonucleoprotein A1 (Helix-destabilizing protein) (Single-strand binding protein) (hnRNP core protein A1) (HDP-1) (Topoisomerase-inhibitor suppressed)	Hnrnpa1l2 /// LOC634350	544954 /// 634350
10531633	heterogeneous nuclear ribonucleoprotein D	Hnrnpd	11991
10427290	homeo box C8	Hoxc8	15426
10581605	haptoglobin	Hp	15439
10515378	4-hydroxyphenylpyruvate dioxygenase-like	Hpdl	242642
10566477	hemopexin	Hpx	15458
10442603	heparan sulfate (glucosamine) 3-O-sulfotransferase 6	Hs3st6	328779
10361234	hydroxysteroid 11-beta dehydrogenase 1	Hsd11b1	15483
10485294	hydroxysteroid (17-beta) dehydrogenase 12	Hsd17b12	56348
10455656	hydroxysteroid (17-beta) dehydrogenase 4	Hsd17b4	15488
10505200	hydroxysteroid dehydrogenase like 2	Hsdl2	72479
10471586	heat shock protein 5	Hspa5	14828
10458226	heat shock protein 9	Hspa9	15526
10509992	heat shock protein family, member 7 (cardiovascular)	Hspb7	29818
10535904	heat shock 105kDa/110kDa protein 1	Hsph1	15505
10595324	5-hydroxytryptamine (serotonin) receptor 1B	Htr1b	15551
10584712	hypoxia up-regulated 1	Hyou1	12282
10462621	RIKEN cDNA I830012O16 gene	I830012O16Rik	667370
10399691	inhibitor of DNA binding 2	Id2	15902
10404975	inhibitor of DNA binding 4	Id4	15904
10355214	isocitrate dehydrogenase 1 (NADP+), soluble	Idh1	15926
10585417	isocitrate dehydrogenase 3 (NAD+) alpha	Idh3a	67834
10487629	isocitrate dehydrogenase 3 (NAD+) beta	Idh3b	170718
10605090	isocitrate dehydrogenase 3 (NAD+), gamma	Idh3g	15929
10360391	interferon activated gene 203	Ifi203	15950
10397975	interferon, alpha-inducible protein 27 like 1	Ifi27l1	52668
10402347	interferon, alpha-inducible protein 27 like 2A	Ifi27l2a	76933
10462613	interferon-induced protein with tetratricopeptide repeats 2	Ifit2	15958
10462618	interferon-induced protein with tetratricopeptide repeats 3	Ifit3	15959
10569020	interferon induced transmembrane protein 6	Ifitm6	213002
10436169	intraflagellar transport 57 homolog (Chlamydomonas)	Ift57	73916
10498599	intraflagellar transport 80 homolog (Chlamydomonas)	Ift80	68259
10568529	IKAROS family zinc finger 5	Ikzf5	67143
10487597	interleukin 1 beta	Il1b	16176
10366572	interleukin 22 /// interleukin 10-related T cell-derived inducible factor beta	Il22 /// Iltifb	50929 /// 116849
10557326	interleukin 4 receptor, alpha	Il4ra	16190
10395520	IMP2 inner mitochondrial membrane peptidase-like (S. cerevisiae)	Immp2l	93757
10539026	inner membrane protein, mitochondrial	Immt	76614
10456383	inositol (myo)-1(or 4)-monophosphatase 2	Impa2	114663
10543572	inosine 5'-phosphate dehydrogenase 1	Impdh1	23917
10520362	insulin induced gene 1	Insig1	231070
10589099	inositol hexaphosphate kinase 2	Ip6k2	76500
10435525	IQ calmodulin-binding motif containing 1	Iqcb1	320299
10534883	insulin receptor substrate 3	Irs3	16369
10406017	Iroquois related homeobox 4 (Drosophila)	Irx4	50916
10469151	inter-alpha (globulin) inhibitor H5	Itih5	209378
10567297	inositol 1,4,5-triphosphate receptor interacting protein-like 2	Itpripl2	319622
10474836	isovaleryl coenzyme A dehydrogenase	Ivd	56357
10572693	Janus kinase 3 /// insulin-like 3	Jak3 /// Insl3	16453 /// 16336
10570516	kelch repeat and BTB (POZ) domain containing 11	Kbtbd11	74901
10492402	potassium voltage-gated channel, shaker-related subfamily, beta member 1	Kcnab1	16497
10489872	potassium voltage gated channel, Shab-related subfamily, member 1	Kcnb1	16500
10520506	potassium channel, subfamily K, member 3	Kcnk3	16527
10375137	potassium large conductance calcium-activated channel, subfamily M, beta member 1	Kcnmb1	16533
10350438	potassium channel, subfamily T, member 2	Kcnt2	240776
10585338	KDEL (Lys-Asp-Glu-Leu) containing 2	Kdelc2	68304
10598798	4lysine (K)-specific demethylase 6A	Kdm6a	22289
10530692	kinase insert domain protein receptor	Kdr	16542
10431659	kinesin family member 21A	Kif21a	16564
10366052	kit ligand	Kitl	17311
10522127	klotho beta	Klb	83379
10403352	Kruppel-like factor 6	Klf6	23849
10462091	Kruppel-like factor 9 /// predicted gene 9971	Klf9 /// Gm9971	16601 /// 100036529
10517727	kelch domain containing 7A	Klhdc7a	242721
10472598	kelch-like 23 (Drosophila)	Klhl23	277396
10428809	kelch-like 38 (Drosophila)	Klhl38	268807
10552488	kallikrein related-peptidase 10	Klk10	69540
10548314	killer cell lectin-like receptor subfamily B member 1B	Klrb1b	80782
10352000	kynurenine 3-monooxygenase (kynurenine 3-hydroxylase)	Kmo	98256
10438681	kininogen 2	Kng2	385643
10432897	keratin 79	Krt79	223917
10368893	lactation elevated 1	Lace1	215951
10395163	laminin B1 subunit 1	Lamb1-1	16777
10481627	lipocalin 2	Lcn2	16819
10586140	lactase-like /// Zwilch, kinetochore associated, homolog (Drosophila)	Lctl /// Zwilch	235435 /// 68014
10553301	lactate dehydrogenase A	Ldha	16828
10462035	lactate dehydrogenase B	Ldhb	16832
10549097	lactate dehydrogenase B	Ldhb	16832
10581865	lactate dehydrogenase D	Ldhd	52815
10506301	leptin receptor	Lepr	16847
10529313	leucine zipper-EF-hand containing transmembrane protein 1	Letm1	56384
10426909	LETM1 domain containing 1	Letmd1	68614
10465701	lectin, galactose binding, soluble 12	Lgals12	56072
10393573	lectin, galactoside-binding, soluble, 3 binding protein	Lgals3bp	19039
10422822	leukemia inhibitory factor receptor	Lifr	16880
10363070	leukocyte immunoglobulin-like receptor, subfamily B, member 4 /// glycoprotein 49 A	Lilrb4 /// Gp49a	14728 /// 14727
10363265	LIM and senescent cell antigen-like domains 1	Lims1	110829
10551155	lipase, hormone sensitive	Lipe	16890
10561031	lipase, hormone sensitive	Lipe	16890
10353871	lectin, mannose-binding 2-like	Lman2l	214895
10608365	similar to putative /// similar to MGC107098 protein /// hypothetical protein LOC100039926 /// hypothetical protein LOC100042044 /// similar to putative /// similar to putative /// similar to spermiogenesis specific transcript on the Y 2 /// spermiogenesis specific transcript on the Y 2 /// similar to Ssty2 protein /// spermiogenesis specific transcript on the Y 2-like /// spermiogenesis specific…	LOC100040673 /// LOC100041207 /// LOC100039926 /// LOC100042044 /// LOC100042401 /// LOC100039753 /// MGC107098 /// Ssty2 /// LOC100040786 /// LOC100040911 /// LOC100039574 /// LOC100042428	100040673 /// 100041207 /// 100039926 /// 100042044 /// 100042401 /// 100039753 /// 434935 /// 70009 /// 100040786 /// 100040911 /// 100039574 /// 100042428
10608586	similar to Sycp3 like Y-linked /// Sycp3 like Y-linked /// similar to Sycp3 like Y-linked /// similar to Sycp3 like Y-linked /// similar to Sycp3 like Y-linked	LOC100042331 /// Sly /// LOC100041897 /// LOC380994 /// LOC100040329	100042331 /// 382301 /// 100041897 /// 380994 /// 100040329
10443492	ribosomal protein L21 pseudogene /// ribosomal protein L21 pseudogene /// predicted gene 10045 /// predicted gene 9104 /// ribosomal protein L21 pseudogene /// ribosomal protein L21 pseudogene /// predicted gene 16416 /// ribosomal protein L21 pseudogene /// ribosomal protein L21 pseudogene /// Rpl21 pseudogene /// ribosomal protein L21 pseudogene /// ribosomal protein L21 pseudogene /// ribosoma…	LOC100042767 /// Gm7218 /// Gm10045 /// Gm9104 /// Gm5495 /// Gm5816 /// Gm16416 /// Gm5201 /// Gm7062 /// Gm8054 /// Gm16376 /// Gm7806 /// Rpl21 /// Gm6813	100042767 /// 637748 /// 100043348 /// 668319 /// 433125 /// 545226 /// 432801 /// 382843 /// 631359 /// 666340 /// 100043646 /// 665821 /// 19933 /// 627939
10445376	ribosomal protein L21 pseudogene /// predicted gene 9104 /// ribosomal protein L21 pseudogene /// ribosomal protein L21 pseudogene /// ribosomal protein L21 /// predicted gene 6813	LOC100042767 /// Gm9104 /// Gm5201 /// Gm16376 /// Rpl21 /// Gm6813	100042767 /// 668319 /// 382843 /// 100043646 /// 19933 /// 627939
10394846	similar to development and differentiation enhancing factor 2	LOC100043371	100043371
10363699	similar to ribosomal protein S6 /// ribosomal protein S6	LOC100043734 /// Rps6	100043734 /// 20104
10386195	similar to olfactory receptor (MOR275-3) pseudogene	LOC100044660	100044660
10394786	hypothetical protein LOC236260 /// RIKEN cDNA 1700030C10 gene	LOC236260 /// 1700030C10Rik	236260 /// 69513
10607429	pol polyprotein	LOC280487	280487
10573865	hypothetical gene LOC433762	LOC433762	433762
10425046	similar to heterogeneous nuclear ribonucleoprotein A3	LOC626711	626711
10579066	similar to Cadherin-11 precursor (Osteoblast-cadherin) (OB-cadherin) (OSF-4) /// predicted gene 3365	LOC636687 /// Gm3365	636687 /// 100041482
10538890	hypothetical protein LOC641050	LOC641050	641050
10538892	hypothetical protein LOC641050	LOC641050	641050
10578189	similar to chromodomain helicase DNA binding protein 6	LOC676031	676031
10578207	LON peptidase N-terminal domain and ring finger 1	Lonrf1	244421
10599192	LON peptidase N-terminal domain and ring finger 3	Lonrf3	74365
10541695	lysophosphatidylcholine acyltransferase 3	Lpcat3	14792
10502772	latrophilin 2	Lphn2	99633
10399478	lipin 1	Lpin1	14245
10434806	LIM domain containing preferred translocation partner in lipoma	Lpp	210126
10607225	leucine-rich repeats and calponin homology (CH) domain containing 2	Lrch2	210297
10451953	leucine-rich alpha-2-glycoprotein 1	Lrg1	76905
10430105	leucine rich repeat containing 24 /// RIKEN cDNA C030006K11 gene	Lrrc24 /// C030006K11Rik	378937 /// 223665
10572445	leucine rich repeat containing 25	Lrrc25	211228
10497105	leucine rich repeat containing 40	Lrrc40	67144
10490872	leucine rich repeat and coiled-coil domain containing 1	Lrrcc1	71710
10562382	LSM14 homolog A (SCD6, S. cerevisiae)	Lsm14a	67070
10536595	LSM8 homolog, U6 small nuclear RNA associated (S. cerevisiae)	Lsm8	76522
10385583	leukotriene C4 synthase	Ltc4s	17001
10429573	lymphocyte antigen 6 complex, locus C2 /// lymphocyte antigen 6 complex, locus C1	Ly6c2 /// Ly6c1	100041546 /// 17067
10587226	LysM, putative peptidoglycan-binding, domain containing 2	Lysmd2	70082
10372652	lysozyme 1	Lyz1	17110
10463263	leucine zipper transcription factor-like 1	Lztfl1	93730
10424113	mal, T-cell differentiation protein 2	Mal2	105853
10477353	microtubule-associated protein, RP/EB family, member 1	Mapre1	13589
10454286	microtubule-associated protein, RP/EB family, member 2	Mapre2	212307
10472277	membrane-associated ring finger (C3HC4) 7	March7	57438
10463224	MARVEL (membrane-associating) domain containing 1	Marveld1	277010
10454809	matrin 3	Matr3	17184
10476276	mitochondrial antiviral signaling protein	Mavs	228607
10497773	methylcrotonoyl-Coenzyme A carboxylase 1 (alpha)	Mccc1	72039
10411532	methylcrotonoyl-Coenzyme A carboxylase 2 (beta)	Mccc2	78038
10357436	minichromosome maintenance deficient 6 (MIS5 homolog, S. pombe) (S. cerevisiae)	Mcm6	17219
10526381	malate dehydrogenase 2, NAD (mitochondrial)	Mdh2	17448
10554819	malic enzyme 3, NADP(+)-dependent, mitochondrial	Me3	109264
10508686	mitochondrial trans-2-enoyl-CoA reductase	Mecr	26922
10382852	major facilitator superfamily domain containing 11	Mfsd11	69900
10377782	macrophage galactose N-acetyl-galactosamine specific lectin 1	Mgl1	17312
10377774	macrophage galactose N-acetyl-galactosamine specific lectin 2	Mgl2	216864
10539894	monoglyceride lipase	Mgll	23945
10542470	microsomal glutathione S-transferase 1	Mgst1	56615
10506397	mesoderm induction early response 1 homolog (Xenopus laevis	Mier1	71148
10536376	missing oocyte, meiosis regulator, homolog (Drosophila)	Mios	252875
10433656	MKL/myocardin-like 2	Mkl2	239719
10532944	malectin	Mlec	109154
10597288	mutL homolog 1 (E. coli)	Mlh1	17350
10520048	myeloid/lymphoid or mixed-lineage leukemia 5	Mll5	69188
10526277	MLX interacting protein-like	Mlxipl	58805
10575867	malonyl-CoA decarboxylase	Mlycd	56690
10532828	methylmalonic aciduria (cobalamin deficiency) type B homolog (human)	Mmab	77697
10515363	methylmalonic aciduria cblC type, with homocystinuria	Mmachc	67096
10380289	monocyte to macrophage differentiation-associated	Mmd	67468
10535331	monocyte to macrophage differentiation-associated 2	Mmd2	75104
10492355	membrane metallo endopeptidase	Mme	17380
10574350	matrix metallopeptidase 15	Mmp15	17388
10583071	matrix metallopeptidase 3	Mmp3	17392
10478633	matrix metallopeptidase 9	Mmp9	17395
10524327	meningioma 1	Mn1	433938
10346310	MOB1, Mps One Binder kinase activator-like 3 (yeast)	Mobkl3	19070
10347741	monoacylglycerol O-acyltransferase 1	Mogat1	68393
10396778	membrane protein, palmitoylated 5 (MAGUK p55 subfamily member 5)	Mpp5	56217
10433702	Mpv17 transgene, kidney disease mutant-like	Mpv17l	93734
10584827	myelin protein zero-like 2	Mpzl2	14012
10436804	melanocortin 2 receptor accessory protein	Mrap	77037
10566564	mitochondrial ribosomal protein L17	Mrpl17	27397
10514884	mitochondrial ribosomal protein L37	Mrpl37	56280
10393125	mitochondrial ribosomal protein L38	Mrpl38	60441
10406865	mitochondrial ribosomal protein S27	Mrps27	218506
10382565	mitchondrial ribosomal protein S7	Mrps7	50529
10605421	mature T-cell proliferation 1	Mtcp1	17763
10423577	metadherin	Mtdh	67154
10527918	mitochondrial transcription termination factor /// predicted gene 9897	Mterf /// Gm9897	545725 /// 208595
10367641	methylenetetrahydrofolate dehydrogenase (NADP+ dependent) 1-like	Mthfd1l	270685
10587368	mitochondrial translation optimization 1 homolog (S. cerevisiae)	Mto1	68291
10413609	musculoskeletal, embryonic nuclear protein 1	Mustn1	66175
10597648	myeloid differentiation primary response gene 88	Myd88	17874
10525343	myosin, light polypeptide 2, regulatory, cardiac, slow	Myl2	17906
10408543	myosin light chain kinase family, member 4	Mylk4	238564
10585956	myosin IXa	Myo9a	270163
10585974	myosin IXa	Myo9a	270163
10585976	myosin IXa	Myo9a	270163
10585978	myosin IXa	Myo9a	270163
10585980	myosin IXa	Myo9a	270163
10514441	myb-like, SWIRM and MPN domains 1	Mysm1	320713
10531370	N-acylethanolamine acid amidase	Naaa	67111
10497490	N-acetylated alpha-linked acidic dipeptidase-like 2	Naaladl2	635702
10497501	N-acetylated alpha-linked acidic dipeptidase-like 2	Naaladl2	635702
10581111	NEDD8 activating enzyme E1 subunit 1	Nae1	234664
10435821	N-acetyltransferase 13	Nat13	72117
10521168	N-acetyltransferase 8-like	Nat8l	269642
10399087	non-SMC condensin II complex, subunit G2	Ncapg2	76044
10356312	nucleolin	Ncl	17975
10356657	NADH dehydrogenase (ubiquinone) 1 alpha subcomplex 10	Ndufa10	67273
10543134	NADH dehydrogenase (ubiquinone) 1 alpha subcomplex, 4	Ndufa4	17992
10482089	NADH dehydrogenase (ubiquinone) 1 alpha subcomplex, 8	Ndufa8	68375
10548057	NADH dehydrogenase (ubiquinone) 1 alpha subcomplex, 9	Ndufa9	66108
10462193	NADH dehydrogenase (ubiquinone) 1 beta subcomplex 4	Ndufb4	68194
10491406	NADH dehydrogenase (ubiquinone) 1 beta subcomplex, 5 /// similar to NADH dehydrogenase (ubiquinone) 1 beta subcomplex, 5	Ndufb5 /// LOC100046199	66046 /// 100046199
10468016	NADH dehydrogenase (ubiquinone) 1 beta subcomplex 8	Ndufb8	67264
10424340	NADH dehydrogenase (ubiquinone) 1 beta subcomplex, 9	Ndufb9	66218
10355084	NADH dehydrogenase (ubiquinone) Fe-S protein 1	Ndufs1	227197
10360076	NADH dehydrogenase (ubiquinone) Fe-S protein 2	Ndufs2	226646
10386171	NADH dehydrogenase (ubiquinone) Fe-S protein 3	Ndufs3	68349
10484912	NADH dehydrogenase (ubiquinone) Fe-S protein 3	Ndufs3	68349
10412251	NADH dehydrogenase (ubiquinone) Fe-S protein 4	Ndufs4	17993
10364744	NADH dehydrogenase (ubiquinone) Fe-S protein 7	Ndufs7	75406
10464572	NADH dehydrogenase (ubiquinone) flavoprotein 1	Ndufv1	17995
10443808	NADH dehydrogenase (ubiquinone) flavoprotein 3	Ndufv3	78330
10407420	neuroepithelial cell transforming gene 1	Net1	56349
10502830	nexilin	Nexn	68810
10506050	nuclear factor I/A	Nfia	18027
10514049	nuclear factor I/B	Nfib	18028
10409278	nuclear factor, interleukin 3, regulated	Nfil3	18030
10489004	nitrogen fixation gene 1 (S. cerevisiae)	Nfs1	18041
10533720	niacin receptor 1	Niacr1	80885
10428089	NIPA-like domain containing 2	Nipal2	223473
10574676	nucleolar protein 3 (apoptosis repressor with CARD domain)	Nol3	78688
10379228	nitric oxide synthase 2, inducible	Nos2	18126
10424119	nephroblastoma overexpressed gene	Nov	18133
10554752	NADPH oxidase 4	Nox4	50490
10345675	neuronal PAS domain protein 2	Npas2	18143
10385043	nucleophosmin 1	Npm1	18148
10583340	nucleophosmin 1	Npm1	18148
10362593	nucleophosmin 1 /// predicted gene 6477 /// predicted gene 9118	Npm1 /// Gm6477 /// Gm9118	18148 /// 624165 /// 668347
10363178	nucleophosmin 1 /// predicted gene 6477 /// predicted gene 9118	Npm1 /// Gm6477 /// Gm9118	18148 /// 624165 /// 668347
10585842	neuroplastin	Nptn	20320
10572070	neuropeptide Y receptor Y1	Npy1r	18166
10581538	NAD(P)H dehydrogenase, quinone 1	Nqo1	18104
10484987	nuclear receptor subfamily 1, group H, member 3	Nr1h3	22259
10564527	nuclear receptor subfamily 2, group F, member 2	Nr2f2	11819
10572949	nuclear receptor subfamily 3, group C, member 2	Nr3c2	110784
10593776	neuregulin 4	Nrg4	83961
10346843	neuropilin 2	Nrp2	18187
10600082	NAD(P) dependent steroid dehydrogenase-like	Nsdhl	18194
10526345	NOL1/NOP2/Sun domain family, member 5	Nsun5	100609
10544982	5'-nucleotidase, cytosolic III	Nt5c3	107569
10405633	neurotrophic tyrosine kinase, receptor, type 2	Ntrk2	18212
10598236	nudix (nucleoside diphosphate linked moiety X)-type motif 11	Nudt11	58242
10412943	nudix (nucleoside diphosphate linked moiety X)-type motif 13	Nudt13	67725
10575685	nudix (nucleoside diphosphate linked moiety X)-type motif 7	Nudt7	67528
10388532	nucleoredoxin	Nxn	18230
10354418	oligonucleotide/oligosaccharide-binding fold containing 2A	Obfc2a	109019
10554969	odd Oz/ten-m homolog 4 (Drosophila)	Odz4	23966
10374119	oxoglutarate dehydrogenase (lipoamide)	Ogdh	18293
10405063	osteoglycin	Ogn	18295
10473489	olfactory receptor 1032	Olfr1032	258572
10473491	olfactory receptor 1033	Olfr1033	258571
10473494	olfactory receptor 1034 /// olfactory receptor 1036	Olfr1034 /// Olfr1036	258216 /// 258245
10555260	olfactory receptor 521	Olfr521	258353
10584500	olfactory receptor 963	Olfr963	258087
10436828	oligodendrocyte transcription factor 1	Olig1	50914
10429859	5-oxoprolinase (ATP-hydrolysing)	Oplah	75475
10505438	orosomucoid 1	Orm1	18405
10505445	orosomucoid 3	Orm3	18407
10390685	ORM1-like 3 (S. cerevisiae)	Ormdl3	66612
10394534	odd-skipped related 1 (Drosophila)	Osr1	23967
10521574	otopetrin 1	Otop1	21906
10467162	pantothenate kinase 1	Pank1	75735
10587871	progestin and adipoQ receptor family member IX	Paqr9	75552
10346838	par-3 partitioning defective 3 homolog B (C. elegans)	Pard3b	72823
10417183	propionyl-Coenzyme A carboxylase, alpha polypeptide	Pcca	110821
10596053	propionyl Coenzyme A carboxylase, beta polypeptide	Pccb	66904
10601569	protocadherin 11 X-linked	Pcdh11x	245578
10421924	protocadherin 9	Pcdh9	211712
10455118	protocadherin beta 18	Pcdhb18	93889
10539310	polycomb group ring finger 1	Pcgf1	69837
10462683	polycomb group ring finger 5	Pcgf5	76073
10479047	phosphoenolpyruvate carboxykinase 1, cytosolic	Pck1	18534
10360053	Purkinje cell protein 4-like 1	Pcp4l1	66425
10460400	pyruvate carboxylase	Pcx	18563
10393851	phosphate cytidylyltransferase 2, ethanolamine	Pcyt2	68671
10482139	phosducin-like	Pdcl	67466
10345666	phosducin-like 3	Pdcl3	68833
10555510	phosphodiesterase 2A, cGMP-stimulated	Pde2a	207728
10607587	pyruvate dehydrogenase E1 alpha 1	Pdha1	18597
10417538	pyruvate dehydrogenase (lipoamide) beta	Pdhb	68263
10485429	pyruvate dehydrogenase complex, component X	Pdhx	27402
10394735	protein disulfide isomerase associated 6	Pdia6	71853
10543017	pyruvate dehydrogenase kinase, isoenzyme 4	Pdk4	27273
10427816	PDZ domain containing 2	Pdzd2	68070
10392221	platelet/endothelial cell adhesion molecule 1	Pecam1	18613
10377439	period homolog 1 (Drosophila)	Per1	18626
10356601	period homolog 2 (Drosophila) /// RIKEN cDNA 9830107B12 gene	Per2 /// 9830107B12Rik	18627 /// 328829
10518781	period homolog 3 (Drosophila)	Per3	18628
10361887	PERP, TP53 apoptosis effector	Perp	64058
10564805	peroxisomal biogenesis factor 11 alpha	Pex11a	18631
10474028	peroxisomal biogenesis factor 16	Pex16	18633
10547701	peroxisomal biogenesis factor 5	Pex5	19305
10445607	peroxisomal biogenesis factor 6	Pex6	224824
10602385	6-phosphofructo-2-kinase/fructose-2,6-biphosphatase 1	Pfkfb1	18639
10480035	6-phosphofructo-2-kinase/fructose-2,6-biphosphatase 3	Pfkfb3	170768
10370376	phosphofructokinase, liver, B-type	Pfkl	18641
10518570	phosphogluconate dehydrogenase	Pgd	110208
10506188	phosphoglucomutase 2	Pgm2	72157
10555303	phosphoglucomutase 2-like 1	Pgm2l1	70974
10466800	phosphoglucomutase 5	Pgm5	226041
10404792	phosphatase and actin regulator 1 /// carbohydrate sulfotransferase 11	Phactr1 /// Chst11	218194 /// 58250
10516910	phosphatase and actin regulator 4	Phactr4	100169
10380551	prohibitin	Phb	18673
10422776	prohibitin	Phb	18673
10541711	prohibitin 2	Phb2	12034
10497646	polyhomeotic-like 3 (Drosophila)	Phc3	241915
10385747	PHD finger protein 15	Phf15	76901
10350146	pleckstrin homology-like domain, family A, member 3	Phlda3	27280
10439710	pleckstrin homology-like domain, family B, member 2	Phldb2	208177
10380566	phosphatase, orphan 1 /// ABI gene family, member 3	Phospho1 /// Abi3	237928 /// 66610
10469046	phytanoyl-CoA hydroxylase	Phyh	16922
10594322	protein inhibitor of activated STAT 1	Pias1	56469
10416753	progesterone immunomodulatory binding factor 1	Pibf1	52023
10545528	phosphatidylinositol glycan anchor biosynthesis, class P	Pigp	56176
10443527	proviral integration site 1	Pim1	18712
10490794	protein kinase inhibitor, alpha	Pkia	18767
10439442	phospholipase A1 member A	Pla1a	85031
10461093	phospholipase A2, group XVI	Pla2g16	225845
10358434	phospholipase A2, group IVA (cytosolic, calcium-dependent)	Pla2g4a	18783
10548817	phospholipase B domain containing 1	Plbd1	66857
10476443	phospholipase C, beta 4	Plcb4	18798
10346330	phospholipase C-like 1	Plcl1	227120
10422628	phosphatidylinositol-specific phospholipase C, X domain containing 3	Plcxd3	239318
10491106	phospholipase D1	Pld1	18805
10398907	phospholipase D family, member 4	Pld4	104759
10564795	perilipin 1	Plin1	103968
10514221	perilipin 2	Plin2	11520
10451943	perilipin 5	Plin5	66968
10349694	peptidase M20 domain containing 1	Pm20d1	212933
10470268	peptidase (mitochondrial processing) alpha	Pmpca	66865
10605067	pregnancy upregulated non-ubiquitously expressed CaM kinase	Pnck	93843
10558921	patatin-like phospholipase domain containing 2	Pnpla2	66853
10425822	patatin-like phospholipase domain containing 3	Pnpla3	116939
10605674	polymerase (DNA directed), alpha 1	Pola1	18968
10379204	polymerase (DNA-directed), delta interacting protein 2	Poldip2	67811
10471337	protein-O-mannosyltransferase 1	Pomt1	99011
10397507	protein-O-mannosyltransferase 2 /// glutathione transferase zeta 1 (maleylacetoacetate isomerase)	Pomt2 /// Gstz1	217734 /// 14874
10542983	paraoxonase 1	Pon1	18979
10363498	pyrophosphatase (inorganic) 1	Ppa1	67895
10425987	peroxisome proliferator activated receptor alpha	Ppara	19013
10540897	peroxisome proliferator activated receptor gamma	Pparg	19016
10529979	peroxisome proliferative activated receptor, gamma, coactivator 1 alpha	Ppargc1a	19017
10459193	peroxisome proliferative activated receptor, gamma, coactivator 1 beta	Ppargc1b	170826
10523128	pro-platelet basic protein	Ppbp	57349
10607602	protein phosphatase with EF hand calcium-binding domain 1	Ppef1	237178
10413222	peptidylprolyl isomerase F (cyclophilin F)	Ppif	105675
10464107	per-pentamer repeat gene	Ppnr	26930
10366238	protein phosphatase 1, regulatory (inhibitor) subunit 12A	Ppp1r12a	17931
10357788	protein phosphatase 1, regulatory (inhibitor) subunit 15b	Ppp1r15b	108954
10433163	protein phosphatase 1, regulatory (inhibitor) subunit 1A	Ppp1r1a	58200
10467003	protein phosphatase 1, regulatory (inhibitor) subunit 2 /// protein phosphatase 1, regulatory (inhibitor) subunit 2 pseudogene	Ppp1r2 /// Gm5972	66849 /// 546723
10571321	protein phosphatase 1, regulatory (inhibitor) subunit 3B	Ppp1r3b	244416
10467206	protein phosphatase 1, regulatory (inhibitor) subunit 3C	Ppp1r3c	53412
10490350	protein phosphatase 1, regulatory subunit 3D	Ppp1r3d	228966
10585249	protein phosphatase 2 (formerly 2A), regulatory subunit A (PR 65), beta isoform	Ppp2r1b	73699
10593430	protein phosphatase 2 (formerly 2A), regulatory subunit A (PR 65), beta isoform /// salt inducible kinase 2	Ppp2r1b /// Sik2	73699 /// 235344
10510162	protein phosphatase 2, regulatory subunit B (B56), alpha isoform /// predicted gene 13244 /// predicted gene 3353 /// similar to protein phosphatase 2, regulatory subunit B (B56), alpha isoform	Ppp2r5a /// Gm13244 /// Gm3353 /// LOC677636	226849 /// 545704 /// 100041461 /// 677636
10510197	protein phosphatase 2, regulatory subunit B (B56), alpha isoform /// predicted gene 13244 /// predicted gene 3353 /// similar to protein phosphatase 2, regulatory subunit B (B56), alpha isoform	Ppp2r5a /// Gm13244 /// Gm3353 /// LOC677636	226849 /// 545704 /// 100041461 /// 677636
10538811	PR domain containing 5	Prdm5	70779
10468869	peroxiredoxin 3	Prdx3	11757
10411359	prickle homolog 3 (Drosophila) /// proteolipid protein 2	Prickle3 /// Plp2	54630 /// 18824
10603346	prickle homolog 3 (Drosophila) /// proteolipid protein 2	Prickle3 /// Plp2	54630 /// 18824
10589087	protein kinase, cAMP dependent regulatory, type II alpha	Prkar2a	19087
10399908	protein kinase, cAMP dependent regulatory, type II beta	Prkar2b	19088
10379060	protein interacting with cyclin A1	Proca1	216974
10477717	protein C receptor, endothelial	Procr	19124
10538373	proline rich 15	Prr15	78004
10450145	proteasome (prosome, macropain) subunit, beta type 9 (large multifunctional peptidase 2)	Psmb9	16912
10497079	prostaglandin E receptor 3 (subtype EP3)	Ptger3	19218
10481518	prostaglandin E synthase	Ptges	64292
10471411	prostaglandin E synthase 2	Ptges2	96979
10397189	prostaglandin reductase 2	Ptgr2	77219
10417601	prothymosin alpha	Ptma	19231
10429387	protein tyrosine phosphatase-like (proline instead of catalytic arginine), member b	Ptplb	70757
10435383	protein tyrosine phosphatase-like (proline instead of catalytic arginine), member b	Ptplb	70757
10513139	protein tyrosine phosphatase, non-receptor type 3	Ptpn3	545622
10513141	protein tyrosine phosphatase, non-receptor type 3	Ptpn3	545622
10513145	protein tyrosine phosphatase, non-receptor type 3	Ptpn3	545622
10513152	protein tyrosine phosphatase, non-receptor type 3	Ptpn3	545622
10513160	protein tyrosine phosphatase, non-receptor type 3	Ptpn3	545622
10366476	protein tyrosine phosphatase, receptor type, B	Ptprb	19263
10492448	pentraxin related gene	Ptx3	19288
10560644	poliovirus receptor-related 2	Pvrl2	19294
10400844	liver glycogen phosphorylase	Pygl	110095
10485607	glutamine and serine rich 1	Qser1	99003
10468795	RAB11 family interacting protein 2 (class I)	Rab11fip2	74998
10533462	RAD9 homolog B (S. cerevisiae)	Rad9b	231724
10381298	receptor (calcitonin) activity modifying protein 2	Ramp2	54409
10509410	Rap1 GTPase-activating protein	Rap1gap	110351
10399148	Rap guanine nucleotide exchange factor (GEF) 5	Rapgef5	217944
10410892	RAS p21 protein activator 1	Rasa1	218397
10386455	RAS, dexamethasone-induced 1	Rasd1	19416
10572928	RASD family, member 2	Rasd2	75141
10527538	RAS-like, family 11, member A	Rasl11a	68895
10404904	RNA binding motif protein 24	Rbm24	666794
10397083	RNA binding motif protein 25	Rbm25	67039
10556113	RNA binding motif protein 3	Rbm3	19652
10603469	RNA binding motif protein 3	Rbm3	19652
10530269	RNA binding motif protein 47	Rbm47	245945
10483023	RNA binding motif, single stranded interacting protein 1	Rbms1	56878
10597531	RNA binding motif, single stranded interacting protein	Rbms3	207181
10578123	RNA binding protein gene with multiple splicing	Rbpms	19663
10364784	receptor accessory protein 6	Reep6	70335
10569870	resistin	Retn	57264
10539143	retinol saturase (all trans retinol 13,14 reductase)	Retsat	67442
10358408	regulator of G-protein signaling 1	Rgs1	50778
10411949	regulator of G-protein signalling 7 binding protein	Rgs7bp	52882
10363773	Rho-related BTB domain containing 1	Rhobtb1	69288
10415791	ribonuclease H2, subunit B	Rnaseh2b	67153
10399696	ring finger protein 144A	Rnf144a	108089
10375343	ring finger protein 145	Rnf145	74315
10440560	ring finger protein 160	Rnf160	78913
10428157	ring finger protein 19A	Rnf19a	30945
10456501	RNA (guanine-7-) methyltransferase	Rnmt	67897
10584288	roundabout homolog 4 (Drosophila)	Robo4	74144
10457429	Rho-associated coiled-coil containing protein kinase 1	Rock1	19877
10368504	ribosomal protein L12 /// ribosomal protein L12 pseudogene	Rpl12 /// Gm4957	269261 /// 241053
10466923	ribosomal protein L26 /// ribosomal protein L26 pseudogene /// ribosomal protein L26 pseudogene	Rpl26 /// Gm15772 /// Gm10136	19941 /// 100034726 /// 672214
10537349	ribosomal protein L30 /// predicted gene 6109 /// predicted gene 6570	Rpl30 /// Gm6109 /// Gm6570	19946 /// 619883 /// 625281
10421972	ribosomal protein L36A	Rpl36a	19982
10344931	ribosomal protein L5	Rpl5	19983
10459669	ribosomal protein L5	Rpl5	19983
10422057	ribosomal protein L7A	Rpl7a	27176
10565434	ribosomal protein S13	Rps13	68052
10409968	ribosomal protein S18 /// predicted gene 10260	Rps18 /// Gm10260	20084 /// 100039740
10457920	ribosomal protein S25 /// predicted gene 4963	Rps25 /// Gm4963	75617 /// 243302
10542722	ribosomal protein S25 /// predicted gene 4963	Rps25 /// Gm4963	75617 /// 243302
10552824	Harvey rat sarcoma oncogene, subgroup R	Rras	20130
10404612	ras responsive element binding protein 1	Rreb1	68750
10495001	rosbin, round spermatid basic protein 1	Rsbn1	229675
10368495	R-spondin 3 homolog (Xenopus laevis)	Rspo3	72780
10362904	reticulon 4 interacting protein 1	Rtn4ip1	170728
10552945	RuvB-like protein 2 /// glycogen synthase 1, muscle	Ruvbl2 /// Gys1	20174 /// 14936
10351430	retinoid X receptor gamma	Rxrg	20183
10405179	sphingosine-1-phosphate receptor 3	S1pr3	13610
10414333	sterile alpha motif domain containing 4	Samd4	74480
10542911	sterile alpha motif domain containing 9-like	Samd9l	209086
10370721	strawberry notch homolog 2 (Drosophila)	Sbno2	216161
10593799	S phase cyclin A-associated protein in the ER	Scaper	244891
10533929	scavenger receptor class B, member 1	Scarb1	20778
10472368	sodium channel, voltage-gated, type II, alpha 1	Scn2a1	110876
10472378	sodium channel, voltage-gated, type II, alpha 1	Scn2a1	110876
10472380	sodium channel, voltage-gated, type II, alpha 1	Scn2a1	110876
10472384	sodium channel, voltage-gated, type II, alpha 1	Scn2a1	110876
10472398	sodium channel, voltage-gated, type II, alpha 1	Scn2a1	110876
10472400	sodium channel, voltage-gated, type II, alpha 1	Scn2a1	110876
10472402	sodium channel, voltage-gated, type II, alpha 1	Scn2a1	110876
10450904	short coiled-coil protein	Scoc	56367
10514956	sterol carrier protein 2, liver	Scp2	20280
10349319	secretin receptor	Sctr	319229
10438098	stromal cell-derived factor 2-like 1	Sdf2l1	64136
10410625	succinate dehydrogenase complex, subunit A, flavoprotein (Fp)	Sdha	66945
10509858	succinate dehydrogenase complex, subunit B, iron sulfur (Ip)	Sdhb	67680
10360046	succinate dehydrogenase complex, subunit C, integral membrane protein	Sdhc	66052
10593356	succinate dehydrogenase complex, subunit D, integral membrane protein	Sdhd	66925
10373834	SEC14-like 4 (S. cerevisiae)	Sec14l4	103655
10519693	sema domain, immunoglobulin domain (Ig), short basic domain, secreted, (semaphorin) 3D	Sema3d	108151
10499378	sema domain, immunoglobulin domain (Ig), transmembrane domain (TM) and short cytoplasmic domain, (semaphorin) 4A	Sema4a	20351
10554375	sema domain, immunoglobulin domain (Ig), transmembrane domain (TM) and short cytoplasmic domain, (semaphorin) 4B	Sema4b	20352
10583905	septin 7	Sept7	235072
10402428	serine (or cysteine) peptidase inhibitor, clade A (alpha-1 antiproteinase, antitrypsin), member 12	Serpina12	68054
10404422	serine (or cysteine) peptidase inhibitor, clade B, member 6b	Serpinb6b	20708
10492628	serine (or cysteine) peptidase inhibitor, clade I, member 1	Serpini1	20713
10443459	splicing factor, arginine/serine-rich 3 (SRp20)	Sfrs3	20383
10508490	splicing factor, arginine/serine-rich 5 (SRp40, HRS) /// predicted gene 12966	Sfrs5 /// Gm12966	20384 /// 622469
10457959	SFT2 domain containing 3	Sft2d3	67158
10545812	sideroflexin 5	Sfxn5	94282
10385466	sarcoglycan, delta (dystrophin-associated glycoprotein)	Sgcd	24052
10542965	sarcoglycan, epsilon	Sgce	20392
10534585	SH2B adaptor protein 2	Sh2b2	23921
10437180	SH3-binding domain glutamic acid-rich protein	Sh3bgr	50795
10475625	SHC (Src homology 2 domain containing) family, member 4 /// EP300 interacting inhibitor of differentiation 1	Shc4 /// Eid1	271849 /// 58521
10386604	serine hydroxymethyltransferase 1 (soluble)	Shmt1	20425
10378341	sedoheptulokinase	Shpk	74637
10400967	sine oculis-related homeobox 1 homolog (Drosophila)	Six1	20471
10406111	solute carrier family 12, member 7	Slc12a7	20499
10495035	solute carrier family 16 (monocarboxylic acid transporters), member 1	Slc16a1	20501
10364239	solute carrier family 19 (sodium/hydrogen exchanger), member 1	Slc19a1	20509
10462313	solute carrier family 1 (neuronal/epithelial high affinity glutamate transporter, system Xag), member 1	Slc1a1	20510
10427590	solute carrier family 1 (glial high affinity glutamate transporter), member 3	Slc1a3	20512
10408616	solute carrier family 22, member 23	Slc22a23	73102
10438262	solute carrier family 25 (mitochondrial carrier, citrate transporter), member 1	Slc25a1	13358
10392983	solute carrier family 25 (mitochondrial thiamine pyrophosphate carrier), member 19	Slc25a19	67283
10589076	solute carrier family 25 (mitochondrial carnitine/acylcarnitine translocase), member 20	Slc25a20	57279
10569168	solute carrier family 25 (mitochondrial carrier, glutamate), member 22	Slc25a22	68267
10495405	solute carrier family 25 (mitochondrial carrier, phosphate carrier), member 24	Slc25a24	229731
10517988	solute carrier family 25, member 34	Slc25a34	384071
10377372	solute carrier family 25, member 35	Slc25a35	71998
10500683	solute carrier family 25, member 35 /// RAN guanine nucleotide release factor /// predicted gene 10355	Slc25a35 /// Rangrf /// Gm10355	71998 /// 57785 /// 100043490
10558910	solute carrier family 25, member 35 /// RAN guanine nucleotide release factor /// predicted gene 10355	Slc25a35 /// Rangrf /// Gm10355	71998 /// 57785 /// 100043490
10579199	solute carrier family 25, member 42	Slc25a42	73095
10499372	solute carrier family 25, member 44	Slc25a44	229517
10387743	solute carrier family 2 (facilitated glucose transporter), member 4	Slc2a4	20528
10510516	solute carrier family 2 (facilitated glucose transporter), member 5	Slc2a5	56485
10386020	solute carrier family 36 (proton/amino acid symporter), member 2	Slc36a2	246049
10483199	solute carrier family 38, member 11	Slc38a11	320106
10473384	solute carrier family 43, member 3	Slc43a3	58207
10501811	solute carrier family 44, member 3	Slc44a3	213603
10379184	solute carrier family 46, member 1	Slc46a1	52466
10412773	solute carrier family 4, sodium bicarbonate cotransporter, member 7	Slc4a7	218756
10529052	solute carrier family 5 (sodium-dependent vitamin transporter), member 6	Slc5a6	330064
10419744	solute carrier family 7 (cationic amino acid transporter, y+ system), member 7	Slc7a7	20540
10453233	solute carrier family 8 (sodium/calcium exchanger), member 1	Slc8a1	20541
10418218	sarcolemma associated protein	Slmap	83997
10462237	SWI/SNF related, matrix associated, actin dependent regulator of chromatin, subfamily a, member 2	Smarca2	67155
10518361	SWI/SNF related, matrix associated, actin dependent regulator of chromatin, subfamily a, member 5 /// vomeronasal 2, receptor, pseudogene 14 /// predicted gene 13034	Smarca5 /// Vmn2r-ps14 /// Gm13034	93762 /// 545700 /// 627585
10492558	structural maintenance of chromosomes 4	Smc4	70099
10466682	structural maintenance of chromosomes 5	Smc5	226026
10394560	structural maintenance of chromosomes 6	Smc6	67241
10452701	SMC hinge domain containing 1	Smchd1	74355
10555946	sphingomyelin phosphodiesterase 1, acid lysosomal	Smpd1	20597
10516956	sphingomyelin phosphodiesterase, acid-like 3B	Smpdl3b	100340
10558919	small nucleolar RNA, H/ACA box 52	Snora52	100217419
10563114	small nucleolar RNA, C/D box 32A /// ribosomal protein L13A	Snord32a /// Rpl13a	27209 /// 22121
10563112	small nucleolar RNA, C/D box 33	Snord33	27208
10376885	small nucleolar RNA, C/D box 49B	Snord49b	100217426
10372069	suppressor of cytokine signaling 2	Socs2	216233
10393449	suppressor of cytokine signaling 3	Socs3	12702
10460118	suppressor of cytokine signaling 6	Socs6	54607
10441815	superoxide dismutase 2, mitochondrial	Sod2	20656
10529515	sortilin-related VPS10 domain containing receptor 2	Sorcs2	81840
10596023	SRY-box containing gene 14	Sox14	20669
10356269	Sp140 nuclear body protein /// RIKEN cDNA A530032D15Rik gene	Sp140 /// A530032D15Rik	434484 /// 381287
10403193	trans-acting transcription factor 4	Sp4	20688
10507040	spermatogenesis associated 6	Spata6	67946
10397651	spermatogenesis associated 7	Spata7	104871
10529264	spondin 2, extracellular matrix protein	Spon2	100689
10480445	speckle-type POZ protein-like	Spopl	76857
10386473	sterol regulatory element binding transcription factor 1	Srebf1	20787
10395788	signal recognition particle 54b /// signal recognition particle 54C /// signal recognition particle 54a /// RIKEN cDNA 1700047I17 gene 1	Srp54b /// Srp54c /// Srp54a /// 1700047I17Rik1	665155 /// 100101806 /// 24067 /// 73385
10608260	serine-rich, secreted, Y-linked	Srsy	385550
10608382	serine-rich, secreted, Y-linked	Srsy	385550
10378855	slingshot homolog 2 (Drosophila)	Ssh2	237860
10542740	sarcospan	Sspn	16651
10381172	signal transducer and activator of transcription 5A	Stat5a	20850
10519497	STEAP family member 4	Steap4	117167
10354588	serine/threonine kinase 17b (apoptosis-inducing)	Stk17b	98267
10346576	STE20-related kinase adaptor beta	Stradb	227154
10482177	spermatid perinuclear RNA binding protein	Strbp	20744
10482181	spermatid perinuclear RNA binding protein	Strbp	20744
10416379	succinate-Coenzyme A ligase, ADP-forming, beta subunit	Sucla2	20916
10539159	succinate-CoA ligase, GDP-forming, alpha subunit	Suclg1	56451
10586880	suppressor of hairy wing homolog 4 (Drosophila)	Suhw4	235469
10490078	SMT3 suppressor of mif two 3 homolog 1 (yeast)	Sumo1	22218
10353219	SMT3 suppressor of mif two 3 homolog 2 (yeast) /// predicted gene 13430 /// predicted gene 13690 /// similar to SMT3B protein /// predicted gene 10241 /// predicted gene 10540 /// SMT3 suppressor of mif two 3 homolog 2 pseudogene	Sumo2 /// Gm13430 /// Gm13690 /// LOC100044517 /// Gm10241 /// Gm10540 /// Gm4905	170930 /// 675440 /// 672381 /// 100044517 /// 100043459 /// 100042900 /// 236622
10379346	suppressor of zeste 12 homolog (Drosophila)	Suz12	52615
10496748	synapse defective 1, Rho GTPase, homolog 2 (C. elegans)	Syde2	214804
10564482	synemin, intermediate filament protein	Synm	233335
10501903	synaptopodin 2	Synpo2	118449
10395277	synaptophysin-like protein	Sypl	19027
10464761	synaptotagmin XII	Syt12	171180
10460706	synovial apoptosis inhibitor 1, synoviolin	Syvn1	74126
10606315	TAF9B RNA polymerase II, TATA box binding protein (TBP)-associated factor	Taf9b	407786
10558903	transaldolase 1	Taldo1	21351
10388682	TAO kinase 1	Taok1	216965
10378334	Tax1 (human T-cell leukemia virus type I) binding protein 3	Tax1bp3	76281
10470936	TBC1 domain family, member 13	Tbc1d13	70296
10521927	TBC1 domain family, member 19	Tbc1d19	67249
10422028	TBC1 domain family, member 4	Tbc1d4	210789
10384192	transforming growth factor beta regulated gene 4	Tbrg4	21379
10595560	T-box18	Tbx18	76365
10402195	tandem C2 domains, nuclear	Tc2n	74413
10380887	titin-cap	Tcap	21393
10477069	transcription factor 15	Tcf15	21407
10407940	T-cell receptor gamma, variable 3 /// T-cell receptor gamma, variable 2 /// NLR family, apoptosis inhibitory protein 3 /// T-cell receptor gamma, variable 1	Tcrg-V3 /// Tcrg-V2 /// Naip3 /// Tcrg-V1	21637 /// 21636 /// 667838 /// 21632
10425601	thyrotroph embryonic factor	Tef	21685
10344939	telomeric repeat binding factor 1	Terf1	21749
10435075	transferrin receptor	Tfrc	22042
10557960	transforming growth factor beta 1 induced transcript 1	Tgfb1i1	21804
10604248	THO complex 2	Thoc2	331401
10390691	thyroid hormone receptor alpha /// nuclear receptor subfamily 1, group D, member 1	Thra /// Nr1d1	21833 /// 217166
10565609	thyroid hormone responsive SPOT14 homolog (Rattus)	Thrsp	21835
10594199	thrombospondin, type I, domain containing 4	Thsd4	207596
10567407	THUMP domain containing 1	Thumpd1	233802
10586184	timeless interacting protein	Tipin	66131
10413542	transketolase	Tkt	21881
10379034	TLC domain containing 1	Tlcd1	68385
10483563	tousled-like kinase 1	Tlk1	228012
10381872	tousled-like kinase 2 (Arabidopsis) /// RIKEN cDNA 1700052K11 gene	Tlk2 /// 1700052K11Rik	24086 /// 73431
10607870	toll-like receptor 7	Tlr7	170743
10504891	transmembrane protein with EGF-like and two follistatin-like domains 1	Tmeff1	230157
10534504	transmembrane protein 120A	Tmem120a	215210
10525473	transmembrane protein 120B	Tmem120b	330189
10583145	transmembrane protein 123	Tmem123	71929
10565437	transmembrane protein 135	Tmem135	72759
10553140	transmembrane protein 143	Tmem143	70209
10404731	transmembrane protein 14C	Tmem14c	66154
10345869	transmembrane protein 182	Tmem182	381339
10508707	transmembrane protein 200B	Tmem200b	623230
10357239	transmembrane protein 37	Tmem37	170706
10592044	transmembrane protein 45b	Tmem45b	235135
10600597	transmembrane protein 47	Tmem47	192216
10517312	transmembrane protein 57	Tmem57	66146
10499348	transmembrane protein 79	Tmem79	71913
10387368	transmembrane protein 88	Tmem88	67020
10371888	thymopoietin	Tmpo	21917
10549420	transmembrane and tetratricopeptide repeat containing 1	Tmtc1	387314
10372177	transmembrane and tetratricopeptide repeat containing 2	Tmtc2	278279
10360058	translocase of outer mitochondrial membrane 40 homolog-like (yeast)	Tomm40l	641376
10388749	TNF receptor associated factor 4	Traf4	22032
10437311	TNF receptor-associated protein 1	Trap1	68015
10480224	tRNA aspartic acid methyltransferase 1	Trdmt1	13434
10566326	tripartite motif-containing 12 /// similar to tripartite motif protein TRIM12	Trim12 /// LOC100048060	76681 /// 100048060
10406953	tripartite motif-containing 23	Trim23	81003
10494924	tripartite motif-containing 33	Trim33	94093
10426030	tRNA 5-methylaminomethyl-2-thiouridylate methyltransferase	Trmu	72026
10503259	transformation related protein 53 inducible nuclear protein 1	Trp53inp1	60599
10487277	transient receptor potential cation channel, subfamily M, member 7	Trpm7	58800
10606989	TSC22 domain family, member 3	Tsc22d3	14605
10397606	thyroid stimulating hormone receptor	Tshr	22095
10543306	tetraspanin 12	Tspan12	269831
10369531	tetraspanin 15	Tspan15	70423
10485198	tetraspanin 18	Tspan18	241556
10494821	tetraspanin 2	Tspan2	70747
10430319	thiosulfate sulfurtransferase, mitochondrial	Tst	22117
10491438	tetratricopeptide repeat domain 14	Ttc14	67120
10437080	tetratricopeptide repeat domain 3	Ttc3	22129
10496854	tubulin tyrosine ligase-like family, member 7	Ttll7	70892
10541301	tubulin, alpha 8	Tuba8	53857
10553568	tubulin, gamma complex associated protein 5	Tubgcp5	233276
10557420	Tu translation elongation factor, mitochondrial	Tufm	233870
10578984	Tu translation elongation factor, mitochondrial	Tufm	233870
10383758	taurine upregulated gene 1	Tug1	544752
10378787	tumor suppressor candidate 5	Tusc5	237858
10419170	thioredoxin domain containing 16	Txndc16	70561
10434191	thioredoxin reductase 2 /// similar to thioredoxin reductase 2	Txnrd2 /// LOC100044101	26462 /// 100044101
10363522	trypsin domain containing 1	Tysnd1	71767
10540273	ubiquitin-conjugating enzyme E2 variant 2 /// similar to ubiquitin-conjugating enzyme E2 variant 2	Ube2v2 /// LOC635992	70620 /// 635992
10503123	UBX domain protein 2B	Ubxn2b	68053
10350489	ubiquitin carboxyl-terminal esterase L5	Uchl5	56207
10481577	uridine-cytidine kinase 1	Uck1	22245
10469058	upper zone of growth plate and cartilage matrix associated	Ucma	68527
10573152	uncoupling protein 1 (mitochondrial, proton carrier)	Ucp1	22227
10555378	uncoupling protein 3 (mitochondrial, proton carrier)	Ucp3	22229
10443221	UHRF1 (ICBP90) binding protein 1	Uhrf1bp1	224648
10379176	unc-119 homolog (C. elegans)	Unc119	22248
10469083	UPF2 regulator of nonsense transcripts homolog (yeast)	Upf2	326622
10488944	ubiquinol-cytochrome c reductase complex chaperone, CBP3 homolog (yeast)	Uqcc	56046
10589196	ubiquinol-cytochrome c reductase core protein 1	Uqcrc1	22273
10556940	ubiquinol cytochrome c reductase core protein 2	Uqcrc2	67003
10385818	ubiquinol-cytochrome c reductase, complex III subunit VII	Uqcrq	22272
10468287	upregulated during skeletal muscle growth 5	Usmg5	66477
10501879	ubiquitin specific peptidase 53	Usp53	99526
10417912	ubiquitin specific peptidase 54	Usp54	78787
10417920	ubiquitin specific peptidase 54	Usp54	78787
10367734	uronyl-2-sulfotransferase	Ust	338362
10550818	vomeronasal 1 receptor, D22	V1rd22	404291
10575693	vesicle amine transport protein 1 homolog-like (T. californica)	Vat1l	270097
10600524	von Hippel-Lindau binding protein 1	Vbp1	22327
10418868	WD repeat and FYVE domain containing 4	Wdfy4	545030
10599032	WD repeat domain 44	Wdr44	72404
10556266	WEE 1 homolog 1 (S. pombe)	Wee1	22390
10451198	vascular endothelial growth factor A	Vegfa	22339
10547009	vestigial like 4 (Drosophila)	Vgll4	232334
10447006	vitrin	Vit	74199
10362129	vanin 3	Vnn3	26464
10413482	wingless-related MMTV integration site 5A	Wnt5a	22418
10466441	vacuolar protein sorting 13A (yeast)	Vps13a	271564
10453692	vacuolar protein sorting 24 (yeast)	Vps24	66700
10379190	vitronectin	Vtn	22370
10374315	von Willebrand factor C domain containing 2	Vwc2	319922
10374590	exportin 1, CRM1 homolog (yeast)	Xpo1	103573
10347232	X-ray repair complementing defective repair in Chinese hamster cells 5	Xrcc5	22596
10587942	5'-3' exoribonuclease 1	Xrn1	24127
10534531	tyrosine 3-monooxygenase/tryptophan 5-monooxygenase activation protein, gamma polypeptide	Ywhag	22628
10396645	zinc finger and BTB domain containing 1	Zbtb1	268564
10593225	zinc finger and BTB domain containing 16	Zbtb16	235320
10562044	zinc finger and BTB domain containing 32	Zbtb32	58206
10584067	zinc finger and BTB domain containing 44	Zbtb44	235132
10593497	zinc finger CCCH type containing 12C	Zc3h12c	244871
10579910	zinc finger CCCH-type containing 15	Zc3h15	69082
10539486	zinc finger, matrin-like	Zfml	18139
10451879	zinc finger protein 119	Zfp119	104349
10442238	zinc finger protein 51	Zfp51	22709
10572730	zinc finger protein 617	Zfp617	170938
10410362	zinc finger protein 712 /// RIKEN cDNA 6720487G11 gene	Zfp712 /// 6720487G11Rik	78251 /// 319231
10410644	zinc finger protein 72	Zfp72	238722
10449971	zinc finger protein 763	Zfp763	73451
10371271	zinc finger protein 781	Zfp781	331188
10358432	zinc finger protein 825	Zfp825	235956
10468885	zinc finger protein 826 /// cDNA sequence BC029127	Zfp826 /// BC029127	414758 /// 214368
10386394	zinc finger protein 867	Zfp867	237775
10516007	zinc metallopeptidase, STE24 homolog (S. cerevisiae)	Zmpste24	230709
10516435	zinc finger, MYM-type 4	Zmym4	67785
10558295	zinc finger, RAN-binding domain containing 1	Zranb1	360216
10497066	zinc finger, RAN-binding domain containing 2	Zranb2	53861
10549972	zinc finger and SCAN domain containing 4C /// zinc finger and SCAN domain containing 4F /// zinc finger and SCAN domain containing 4, pseudogene 2 /// zinc finger and SCAN domain containing 4D /// zinc finger and SCAN domain containing 4E	Zscan4c /// Zscan4f /// Zscan4-ps2 /// Zscan4d /// Zscan4e	245109 /// 665902 /// 665913 /// 545913 /// 665848
10384691	RIKEN cDNA 0610010F05 gene	0610010F05Rik	71675
10379736	RIKEN cDNA 1100001G20 gene	1100001G20Rik	66107
10355227	RIKEN cDNA 1110028C15 gene	1110028C15Rik	68691
10421810	RIKEN cDNA 1190002H23 gene	1190002H23Rik	66214
10546001	RIKEN cDNA 1190003M12 gene	1190003M12Rik	68888
10378453	RIKEN cDNA 1300001I01 gene	1300001I01Rik	74148
10416588	RIKEN cDNA 1300010F03 gene	1300010F03Rik	219189
10552252	RIKEN cDNA 1600014C10 gene	1600014C10Rik	72244
10354529	RIKEN cDNA 1700019D03 gene	1700019D03Rik	67080
10518335	RIKEN cDNA 1700029I01 gene /// predicted gene 13225 /// predicted gene 13235 /// predicted gene 13251 /// predicted gene 13051 /// predicted gene, OTTMUSG00000010657 /// predicted gene 13151 /// predicted gene 13159 /// similar to novel KRAB box containing protein	1700029I01Rik /// Gm13225 /// Gm13235 /// Gm13251 /// Gm13051 /// OTTMUSG00000010657 /// Gm13151 /// Gm13159 /// LOC100046095	70005 /// 622846 /// 385211 /// 433791 /// 626316 /// 666532 /// 666581 /// 100043100 /// 100046095
10487847	RIKEN cDNA 1700037H04 gene	1700037H04Rik	67326
10519346	RIKEN cDNA 1700109H08 gene /// RIKEN cDNA C030048B08 gene	1700109H08Rik /// C030048B08Rik	77036 /// 269623
10408647	RIKEN cDNA 1810022C23 gene	1810022C23Rik	69123
10395252	RIKEN cDNA 2010109K11 gene	2010109K11Rik	72123
10386197	RIKEN cDNA 2210407C18 gene	2210407C18Rik	78354
10524079	RIKEN cDNA 2310001H12 gene	2310001H12Rik	69504
10532310	RIKEN cDNA 2310001H12 gene /// RIKEN cDNA 4930522L14 gene	2310001H12Rik /// 4930522L14Rik	69504 /// 100041734
10524082	RIKEN cDNA 2310001H12 gene /// similar to novel KRAB box and zinc finger, C2H2 type domain containing protein /// hypothetical protein LOC100044193	2310001H12Rik /// LOC100045081 /// LOC100044193	69504 /// 100045081 /// 100044193
10382573	RIKEN cDNA 2310067B10 gene	2310067B10Rik	71947
10394833	RIKEN cDNA 2410018L13 gene	2410018L13Rik	69732
10422892	RIKEN cDNA 2410089E03 gene	2410089E03Rik	73692
10577226	RIKEN cDNA 2610019F03 gene	2610019F03Rik	72148
10556456	RIKEN cDNA 2610024B07 gene	2610024B07Rik	269987
10412537	RIKEN cDNA 2610042L04 gene /// predicted gene 10021 /// predicted gene, 544988 /// predicted gene, ENSMUSG00000072735 /// predicted gene 3512 /// predicted gene 3020 /// predicted gene 8108 /// predicted gene 3242 /// similar to 1700001E04Rik protein /// predicted gene 3411 /// predicted gene, 100041874 /// hypothetical protein LOC100042207 /// RIKEN cDNA B930046C15 gene /// hypothetical LOC10003…	2610042L04Rik /// Gm10021 /// 544988 /// ENSMUSG00000072735 /// Gm3512 /// Gm3020 /// Gm8108 /// Gm3242 /// LOC100041530 /// Gm3411 /// 100041874 /// LOC100042207 /// B930046C15Rik /// LOC100036568 /// Gm10340 /// D830030K20Rik	554327 /// 622931 /// 544988 /// 100041151 /// 100041791 /// 100040880 /// 666442 /// 100041268 /// 100041530 /// 100041569 /// 100041874 /// 100042207 /// 544998 /// 100036568 /// 100040697 /// 320333
10453555	RIKEN cDNA 2610044O15 gene	2610044O15Rik	72139
10400896	RIKEN cDNA 2810055F11 gene	2810055F11Rik	67217
10436598	RIKEN cDNA 2810055G20 gene	2810055G20Rik	77994
10542885	RIKEN cDNA 2810474O19 gene	2810474O19Rik	67246
10601595	RIKEN cDNA 3110007F17 gene /// predicted gene 2411 /// predicted gene 6604 /// predicted gene 5167	3110007F17Rik /// Gm2411 /// Gm6604 /// Gm5167	73061 /// 100039763 /// 625591 /// 382265
10601598	RIKEN cDNA 3110007F17 gene /// predicted gene 2411 /// predicted gene 6604 /// predicted gene 5167	3110007F17Rik /// Gm2411 /// Gm6604 /// Gm5167	73061 /// 100039763 /// 625591 /// 382265
10448195	zinc finger pseudogene	3110048L19Rik	73233
10442236	RIKEN cDNA 3110052M02 gene	3110052M02Rik	73229
10491825	RIKEN cDNA 3110057O12 gene	3110057O12Rik	269423
10445237	RIKEN cDNA 3110082D06 gene	3110082D06Rik	627626
10455146	RIKEN cDNA 3222401L13 gene	3222401L13Rik	320513
10542880	RIKEN cDNA 4833442J19 gene	4833442J19Rik	320204
10459643	RIKEN cDNA 4930503L19 gene	4930503L19Rik	269033
10591022	RIKEN cDNA 4931406C07 gene	4931406C07Rik	70984
10491601	RIKEN cDNA 4932438A13 gene	4932438A13Rik	229227
10459604	RIKEN cDNA 4933403F05 gene	4933403F05Rik	108654
10504148	RIKEN cDNA 4933409K07 gene	4933409K07Rik	108816
10504178	RIKEN cDNA 4933409K07 gene	4933409K07Rik	108816
10512327	RIKEN cDNA 4933409K07 gene	4933409K07Rik	108816
10551423	RIKEN cDNA 4933426I21 gene	4933426I21Rik	71163
10462081	RIKEN cDNA 5730427N09 gene	5730427N09Rik	59050
10419082	RIKEN cDNA 5730469M10 gene	5730469M10Rik	70564
10505465	RIKEN cDNA 6330416G13 gene	6330416G13Rik	230279
10463826	RIKEN cDNA 6330577E15 gene	6330577E15Rik	67788
10543460	RIKEN cDNA 6332401O19 gene	6332401O19Rik	319832
10601848	signal peptidase complex subunit 3 homolog pseudogene	6530401D17Rik	76219
10410364	RIKEN cDNA 6720487G11 gene	6720487G11Rik	319231
10409990	RIKEN cDNA 6720489N17 gene	6720489N17Rik	211378
10577412	RIKEN cDNA 6820431F20 gene /// RIKEN cDNA A430108E01 gene /// cadherin 11	6820431F20Rik /// A430108E01Rik /// Cdh11	381598 /// 384382 /// 12552
10476660	RIKEN cDNA 8430406I07 gene	8430406I07Rik	74528
10409970	RIKEN cDNA 8430426H19 gene	8430426H19Rik	71508
10523190	RIKEN cDNA 9130213B05 gene	9130213B05Rik	231440
10533360	RIKEN cDNA 9330129D05 gene	9330129D05Rik	338350
10453629	RIKEN cDNA 9430020K01 gene	9430020K01Rik	240185
10408861	RIKEN cDNA 9530008L14 gene	9530008L14Rik	109254
10449142	RIKEN cDNA 9530058B02 gene	9530058B02Rik	68241
10586718	RIKEN cDNA 9530091C08 gene	9530091C08Rik	320440
10565255	RIKEN cDNA 9930013L23 gene	9930013L23Rik	80982
10570639	RIKEN cDNA A430108E01 gene /// RIKEN cDNA 6820431F20 gene	A430108E01Rik /// 6820431F20Rik	384382 /// 381598
10398824	RIKEN cDNA A530016L24 gene	A530016L24Rik	319942
10545079	RIKEN cDNA A530053G22 gene	A530053G22Rik	208079
10448235	RIKEN cDNA A630033E08 gene	A630033E08Rik	240041
10532305	RIKEN cDNA A630089N07 gene /// RIKEN cDNA 2310001H12 gene /// RIKEN cDNA 4930522L14 gene	A630089N07Rik /// 2310001H12Rik /// 4930522L14Rik	320586 /// 69504 /// 100041734
10443027	RIKEN cDNA A930001N09 gene	A930001N09Rik	77128
10338074	---	---	---
10338097	---	---	---
10338104	---	---	---
10338105	---	---	---
10338121	---	---	---
10338199	---	---	---
10338201	---	---	---
10338236	---	---	---
10338246	---	---	---
10338252	---	---	---
10338257	---	---	---
10338263	---	---	---
10338288	---	---	---
10338290	---	---	---
10338308	---	---	---
10338345	---	---	---
10338375	---	---	---
10338377	---	---	---
10338389	---	---	---
10338400	---	---	---
10338406	---	---	---
10338413	---	---	---
10338431	---	---	---
10338437	---	---	---
10338461	---	---	---
10338482	---	---	---
10338485	---	---	---
10338493	---	---	---
10338496	---	---	---
10338497	---	---	---
10338499	---	---	---
10338512	---	---	---
10338527	---	---	---
10338545	---	---	---
10338563	---	---	---
10338568	---	---	---
10338570	---	---	---
10338581	---	---	---
10338599	---	---	---
10338625	---	---	---
10338636	---	---	---
10338653	---	---	---
10338685	---	---	---
10338707	---	---	---
10338716	---	---	---
10338728	---	---	---
10338732	---	---	---
10338737	---	---	---
10338739	---	---	---
10338745	---	---	---
10338746	---	---	---
10338784	---	---	---
10338790	---	---	---
10338798	---	---	---
10338803	---	---	---
10338819	---	---	---
10338824	---	---	---
10338826	---	---	---
10338829	---	---	---
10338849	---	---	---
10338851	---	---	---
10338867	---	---	---
10338873	---	---	---
10338884	---	---	---
10338897	---	---	---
10338904	---	---	---
10338906	---	---	---
10338907	---	---	---
10338910	---	---	---
10338918	---	---	---
10338966	---	---	---
10338972	---	---	---
10338976	---	---	---
10338997	---	---	---
10339001	---	---	---
10339007	---	---	---
10339026	---	---	---
10339035	---	---	---
10339048	---	---	---
10339094	---	---	---
10339097	---	---	---
10339099	---	---	---
10339101	---	---	---
10339122	---	---	---
10339145	---	---	---
10339172	---	---	---
10339205	---	---	---
10339232	---	---	---
10339242	---	---	---
10339255	---	---	---
10339264	---	---	---
10339272	---	---	---
10339278	---	---	---
10339287	---	---	---
10339293	---	---	---
10339301	---	---	---
10339317	---	---	---
10339324	---	---	---
10339345	---	---	---
10339351	---	---	---
10339393	---	---	---
10339427	---	---	---
10339430	---	---	---
10339449	---	---	---
10339453	---	---	---
10339474	---	---	---
10339522	---	---	---
10339533	---	---	---
10339558	---	---	---
10339563	---	---	---
10339603	---	---	---
10339628	---	---	---
10339633	---	---	---
10339652	---	---	---
10339666	---	---	---
10339686	---	---	---
10339713	---	---	---
10339748	---	---	---
10339776	---	---	---
10339778	---	---	---
10339789	---	---	---
10339832	---	---	---
10339863	---	---	---
10339867	---	---	---
10339888	---	---	---
10339901	---	---	---
10339909	---	---	---
10339935	---	---	---
10339950	---	---	---
10339952	---	---	---
10339998	---	---	---
10340061	---	---	---
10340074	---	---	---
10340079	---	---	---
10340085	---	---	---
10340089	---	---	---
10340096	---	---	---
10340106	---	---	---
10340197	---	---	---
10340220	---	---	---
10340226	---	---	---
10340272	---	---	---
10340282	---	---	---
10340313	---	---	---
10340325	---	---	---
10340333	---	---	---
10340358	---	---	---
10340374	---	---	---
10340394	---	---	---
10340417	---	---	---
10340419	---	---	---
10340421	---	---	---
10340456	---	---	---
10340457	---	---	---
10340483	---	---	---
10340484	---	---	---
10340508	---	---	---
10340528	---	---	---
10340583	---	---	---
10340601	---	---	---
10340607	---	---	---
10340644	---	---	---
10340645	---	---	---
10340679	---	---	---
10340689	---	---	---
10340691	---	---	---
10340702	---	---	---
10340703	---	---	---
10340733	---	---	---
10340768	---	---	---
10340770	---	---	---
10340794	---	---	---
10340796	---	---	---
10340799	---	---	---
10340826	---	---	---
10340829	---	---	---
10340835	---	---	---
10340836	---	---	---
10340871	---	---	---
10340878	---	---	---
10340891	---	---	---
10340894	---	---	---
10340901	---	---	---
10340917	---	---	---
10340936	---	---	---
10341007	---	---	---
10341008	---	---	---
10341023	---	---	---
10341054	---	---	---
10341077	---	---	---
10341089	---	---	---
10341113	---	---	---
10341130	---	---	---
10341131	---	---	---
10341137	---	---	---
10341140	---	---	---
10341141	---	---	---
10341147	---	---	---
10341165	---	---	---
10341195	---	---	---
10341215	---	---	---
10341220	---	---	---
10341241	---	---	---
10341276	---	---	---
10341279	---	---	---
10341281	---	---	---
10341292	---	---	---
10341296	---	---	---
10341297	---	---	---
10341326	---	---	---
10341366	---	---	---
10341382	---	---	---
10341412	---	---	---
10341435	---	---	---
10341472	---	---	---
10341484	---	---	---
10341517	---	---	---
10341518	---	---	---
10341537	---	---	---
10341568	---	---	---
10341580	---	---	---
10341586	---	---	---
10341589	---	---	---
10341594	---	---	---
10341621	---	---	---
10341625	---	---	---
10341629	---	---	---
10341662	---	---	---
10341663	---	---	---
10341666	---	---	---
10341672	---	---	---
10341716	---	---	---
10341717	---	---	---
10341742	---	---	---
10341744	---	---	---
10341745	---	---	---
10341763	---	---	---
10341796	---	---	---
10341797	---	---	---
10341802	---	---	---
10341805	---	---	---
10341849	---	---	---
10341870	---	---	---
10341886	---	---	---
10341892	---	---	---
10341926	---	---	---
10341990	---	---	---
10342010	---	---	---
10342027	---	---	---
10342048	---	---	---
10342062	---	---	---
10342065	---	---	---
10342115	---	---	---
10342117	---	---	---
10342127	---	---	---
10342178	---	---	---
10342191	---	---	---
10342223	---	---	---
10342225	---	---	---
10342230	---	---	---
10342239	---	---	---
10342247	---	---	---
10342280	---	---	---
10342285	---	---	---
10342315	---	---	---
10342335	---	---	---
10342343	---	---	---
10342364	---	---	---
10342410	---	---	---
10342420	---	---	---
10342487	---	---	---
10342546	---	---	---
10342558	---	---	---
10342600	---	---	---
10342609	---	---	---
10342624	---	---	---
10342625	---	---	---
10342648	---	---	---
10342663	---	---	---
10342711	---	---	---
10342718	---	---	---
10342726	---	---	---
10342735	---	---	---
10342745	---	---	---
10342749	---	---	---
10342755	---	---	---
10342758	---	---	---
10342759	---	---	---
10342781	---	---	---
10342784	---	---	---
10342810	---	---	---
10342811	---	---	---
10342851	---	---	---
10342903	---	---	---
10342915	---	---	---
10342934	---	---	---
10342959	---	---	---
10342976	---	---	---
10342979	---	---	---
10342987	---	---	---
10343007	---	---	---
10343060	---	---	---
10343062	---	---	---
10343066	---	---	---
10343078	---	---	---
10343109	---	---	---
10343137	---	---	---
10343143	---	---	---
10343167	---	---	---
10343189	---	---	---
10343195	---	---	---
10343222	---	---	---
10343224	---	---	---
10343247	---	---	---
10343273	---	---	---
10343292	---	---	---
10343296	---	---	---
10343306	---	---	---
10343311	---	---	---
10343367	---	---	---
10343378	---	---	---
10343396	---	---	---
10343399	---	---	---
10343409	---	---	---
10343430	---	---	---
10343431	---	---	---
10343453	---	---	---
10343481	---	---	---
10343513	---	---	---
10343536	---	---	---
10343544	---	---	---
10343552	---	---	---
10343558	---	---	---
10343594	---	---	---
10343637	---	---	---
10343644	---	---	---
10343645	---	---	---
10343663	---	---	---
10343673	---	---	---
10343674	---	---	---
10343680	---	---	---
10343716	---	---	---
10343723	---	---	---
10343762	---	---	---
10343785	---	---	---
10343812	---	---	---
10343830	---	---	---
10343833	---	---	---
10343845	---	---	---
10343847	---	---	---
10343903	---	---	---
10343920	---	---	---
10343936	---	---	---
10343940	---	---	---
10343944	---	---	---
10343946	---	---	---
10343977	---	---	---
10343987	---	---	---
10343990	---	---	---
10343997	---	---	---
10344033	---	---	---
10344074	---	---	---
10344151	---	---	---
10344167	---	---	---
10344193	---	---	---
10344204	---	---	---
10344232	---	---	---
10344237	---	---	---
10344254	---	---	---
10344264	---	---	---
10344288	---	---	---
10344299	---	---	---
10344320	---	---	---
10344363	---	---	---
10344372	---	---	---
10344396	---	---	---
10344405	---	---	---
10344424	---	---	---
10344425	---	---	---
10344477	---	---	---
10344527	---	---	---
10344535	---	---	---
10344541	---	---	---
10344546	---	---	---
10344575	---	---	---
10344577	---	---	---
10344580	---	---	---
10344581	---	---	---
10344583	---	---	---
10344613	---	---	---
10354203	---	---	---
10356995	---	---	---
10356997	---	---	---
10367475	---	---	---
10374840	---	---	---
10378438	---	---	---
10379650	---	---	---
10408008	---	---	---
10409061	---	---	---
10417728	---	---	---
10420628	---	---	---
10420668	---	---	---
10428837	---	---	---
10434741	---	---	---
10435185	---	---	---
10435765	---	---	---
10435787	---	---	---
10435791	---	---	---
10442493	---	---	---
10450365	---	---	---
10456488	---	---	---
10457203	---	---	---
10459225	---	---	---
10479975	---	---	---
10490232	---	---	---
10490248	---	---	---
10490770	---	---	---
10497487	---	---	---
10497998	---	---	---
10502949	---	---	---
10504755	---	---	---
10504912	---	---	---
10508719	---	---	---
10521757	---	---	---
10526085	---	---	---
10529091	---	---	---
10532301	---	---	---
10532315	---	---	---
10549530	---	---	---
10550320	---	---	---
10554162	---	---	---
10555233	---	---	---
10558533	---	---	---
10559816	---	---	---
10578136	---	---	---
10582572	---	---	---
10582580	---	---	---
10582584	---	---	---
10598220	---	---	---
10598238	---	---	---
10604954	---	---	---
10608136	---	---	---
10608651	---	---	---
10608654	---	---	---
10608667	---	---	---
10608720	---	---	---
