# Supplementary material for: Plasma Cholesterol–Induced Lesion Networks Activated before Regression of Early, Mature, and Advanced Atherosclerosis
Source: PLoS Genet. 2014 Feb 27;10(2):e1004201. doi: 10.1371/journal.pgen.1004201 (PMC3937269; doi:10.1371/journal.pgen.1004201)
Supplement: Table S4 — PCL-responsive genes at week 50. (XLSX) [file pgen.1004201.s006.xlsx]

## Sheet: Sheet1
Table S4. PCL-responsive genes at week 50
Transcript Cluster ID	Gene Title	Gene Symbol	Entrez Gene ID
10539766	AP2 associated kinase 1	Aak1	269774
10512949	ATP-binding cassette, sub-family A (ABC1), member 1	Abca1	11303
10392522	ATP-binding cassette, sub-family A (ABC1), member 8a	Abca8a	217258
10389894	ATP-binding cassette, sub-family C (CFTR/MRP), member 3	Abcc3	76408
10431697	ATP-binding cassette, sub-family D (ALD), member 2	Abcd2	26874
10579874	ATP-binding cassette, sub-family E (OABP), member 1	Abce1	24015
10443730	ATP-binding cassette, sub-family G (WHITE), member 1	Abcg1	11307
10531952	ATP-binding cassette, sub-family G (WHITE), member 3	Abcg3	27405
10570013	abhydrolase domain containing 13	Abhd13	68904
10558227	acyl-Coenzyme A dehydrogenase, short/branched chain	Acadsb	66885
10352281	acyl-Coenzyme A binding domain containing 3	Acbd3	170760
10469720	acyl-Coenzyme A binding domain containing 5	Acbd5	74159
10557199	acid phosphatase 1, soluble	Acp1	11431
10606532	acid phosphatase 1, soluble	Acp1	11431
10347748	acyl-CoA synthetase long-chain family member 3 /// UTP14, U3 small nucleolar ribonucleoprotein, homolog B (yeast)	Acsl3 /// Utp14b	74205 /// 195434
10607089	acyl-CoA synthetase long-chain family member 4	Acsl4	50790
10477649	acyl-CoA synthetase short-chain family member 2	Acss2	60525
10384522	ARP2 actin-related protein 2 homolog (yeast)	Actr2	66713
10371830	ARP6 actin-related protein 6 homolog (yeast)	Actr6	67019
10586844	a disintegrin and metallopeptidase domain 10	Adam10	11487
10399605	a disintegrin and metallopeptidase domain 17	Adam17	11491
10406982	a disintegrin-like and metallopeptidase (reprolysin type) with thrombospondin type 1 motif, 6	Adamts6	108154
10546432	a disintegrin-like and metallopeptidase (reprolysin type) with thrombospondin type 1 motif, 9	Adamts9	101401
10379389	ArfGAP with dual PH domains 2	Adap2	216991
10413086	adenosine kinase	Adk	11534
10360522	adenylosuccinate synthetase, non muscle	Adss	11566
10375980	AF4/FMR2 family, member 4	Aff4	93736
10384555	aftiphilin	Aftph	216549
10411199	angiogenic factor with G patch and FHA domains 1	Aggf1	66549
10473024	alkylglycerone phosphate synthase	Agps	228061
10409737	ATP/GTP binding protein 1	Agtpbp1	67269
10512999	expressed sequence AI427809	AI427809	381524
10407124	expressed sequence AI452195	AI452195	105178
10495186	expressed sequence AI504432	AI504432	229694
10365420	expressed sequence AI597468 /// MTERF domain containing 3	AI597468 /// Mterfd3	103266 /// 74238
10463158	expressed sequence AI606181	AI606181	226118
10360377	expressed sequence AI607873	AI607873	226691
10467110	expressed sequence AI747699	AI747699	381236
10519988	expressed sequence AI847670	AI847670	330050
10359446	expressed sequence AI848100	AI848100	226551
10562605	expressed sequence AI987944	AI987944	233168
10569890	axin interactor, dorsalization associated	Aida	108909
10450484	allograft inflammatory factor 1	Aif1	11629
10604405	apoptosis-inducing factor, mitochondrion-associated 1	Aifm1	26926
10351867	absent in melanoma 2	Aim2	383619
10502232	aminoacyl tRNA synthetase complex-interacting multifunctional protein 1	Aimp1	13722
10386824	A kinase (PRKA) anchor protein 10	Akap10	56697
10421749	A kinase (PRKA) anchor protein 11	Akap11	219181
10421768	A kinase (PRKA) anchor protein 11	Akap11	219181
10396640	A kinase (PRKA) anchor protein 5	Akap5	238276
10519420	A kinase (PRKA) anchor protein (yotiao) 9	Akap9	100986
10403291	aldo-keto reductase family 1, member C14	Akr1c14	105387
10407467	aldo-keto reductase family 1, member E1	Akr1e1	56043
10360506	thymoma viral proto-oncogene 3	Akt3	23797
10439895	activated leukocyte cell adhesion molecule	Alcam	11658
10466624	aldehyde dehydrogenase family 1, subfamily A7	Aldh1a7	26358
10495651	asparagine-linked glycosylation 14 homolog (yeast)	Alg14	66789
10582925	alkB, alkylation repair homolog 8 (E. coli)	Alkbh8	67667
10512935	S-adenosylmethionine decarboxylase 2 /// S-adenosylmethionine decarboxylase 1	Amd2 /// Amd1	100041585 /// 11702
10538932	S-adenosylmethionine decarboxylase 2 /// S-adenosylmethionine decarboxylase 1	Amd2 /// Amd1	100041585 /// 11702
10549536	antagonist of mitotic exit network 1 homolog (S. cerevisiae)	Amn1	232566
10521863	anaphase promoting complex subunit 4	Anapc4	52206
10428376	angiopoietin 1	Angpt1	11600
10350840	angiopoietin-like 1	Angptl1	72713
10452516	ankyrin repeat domain 12	Ankrd12	106585
10410743	ankyrin repeat domain 32	Ankrd32	105377
10410756	ankyrin repeat domain 32	Ankrd32	105377
10590968	ankyrin repeat domain 49	Ankrd49	56503
10591781	anillin, actin binding protein	Anln	68743
10586064	acidic (leucine-rich) nuclear phosphoprotein 32 family, member A	Anp32a	11737
10504730	acidic (leucine-rich) nuclear phosphoprotein 32 family, member B	Anp32b	67628
10494322	acidic (leucine-rich) nuclear phosphoprotein 32 family, member E	Anp32e	66471
10385081	acidic (leucine-rich) nuclear phosphoprotein 32 family, pseudogene	Anp32-ps	448829
10466606	annexin A1	Anxa1	16952
10603051	adaptor-related protein complex 1, sigma 2 subunit	Ap1s2	108012
10365227	adaptor-related protein complex 3, mu 1 subunit	Ap3m1	55946
10418004	adaptor-related protein complex 3, mu 1 subunit	Ap3m1	55946
10455542	adaptor-related protein complex 3, sigma 1 subunit	Ap3s1	11777
10604230	adaptor-related protein complex 3, sigma 1 subunit	Ap3s1	11777
10475686	adaptor-related protein complex AP-4, epsilon 1	Ap4e1	108011
10395672	adaptor-related protein complex AP-4, sigma 1	Ap4s1	11782
10469695	amyloid beta (A4) precursor protein-binding, family B, member 1 interacting protein	Apbb1ip	54519
10454655	adenomatosis polyposis coli	Apc	11789
10500283	anterior pharynx defective 1a homolog (C. elegans) /// carbonic anhydrase 14	Aph1a /// Car14	226548 /// 23831
10485344	apoptosis inhibitor 5	Api5	11800
10547621	apolipoprotein B mRNA editing enzyme, catalytic polypeptide 1	Apobec1	11810
10560608	apolipoprotein C-II	Apoc2	11813
10601473	apolipoprotein O-like	Apool	68117
10418251	adaptor protein, phosphotyrosine interaction, PH domain and leucine zipper containing 1	Appl1	72993
10530100	ArfGAP with RhoGAP domain, ankyrin repeat and PH domain 2	Arap2	212285
10458498	ArfGAP with RhoGAP domain, ankyrin repeat and PH domain 3	Arap3	106952
10592919	archain 1	Arcn1	213827
10413304	ADP-ribosylation factor 4	Arf4	11843
10353064	ADP-ribosylation factor guanine nucleotide-exchange factor 1(brefeldin A-inhibited)	Arfgef1	211673
10499080	ADP-ribosylation factor interacting protein 1	Arfip1	99889
10457250	Rho GTPase activating protein 12	Arhgap12	75415
10471929	Rho GTPase activating protein 15	Arhgap15	76117
10362294	Rho GTPase activating protein 18	Arhgap18	73910
10523579	Rho GTPase activating protein 24	Arhgap24	231532
10495685	Rho GTPase activating protein 29	Arhgap29	214137
10395692	Rho GTPase activating protein 5	Arhgap5	11855
10582862	Rho guanine nucleotide exchange factor (GEF) 12 /// Sp140 nuclear body protein	Arhgef12 /// Sp140	69632 /// 434484
10605797	CDC42 guanine nucleotide exchange factor (GEF) 9	Arhgef9	236915
10396205	AT rich interactive domain 4A (RBP1-like)	Arid4a	238247
10403680	AT rich interactive domain 4B (RBP1-like)	Arid4b	94246
10594161	ariadne ubiquitin-conjugating enzyme E2 binding protein homolog 1 (Drosophila)	Arih1	23806
10440246	ADP-ribosylation factor-like 13B	Arl13b	68146
10482687	ADP-ribosylation factor-like 5A	Arl5a	75423
10469425	ADP-ribosylation factor-like 5B	Arl5b	75869
10440206	ADP-ribosylation factor-like 6	Arl6	56297
10472128	ADP-ribosylation factor-like 6 interacting protein 6	Arl6ip6	65103
10595990	armadillo repeat containing 8	Armc8	74125
10601771	armadillo repeat containing, X-linked 1	Armcx1	78248
10451851	armadillo repeat containing, X-linked 3	Armcx3	71703
10601778	armadillo repeat containing, X-linked 3	Armcx3	71703
10601768	armadillo repeat containing, X-linked 4	Armcx4	102910
10450796	armadillo repeat containing, X-linked 5	Armcx5	494468
10604763	actin related protein 2/3 complex, subunit 1B /// predicted gene 5637	Arpc1b /// Gm5637	11867 /// 434782
10350684	actin related protein 2/3 complex, subunit 5	Arpc5	67771
10587104	cAMP-regulated phosphoprotein 19	Arpp19	59046
10406407	arrestin domain containing 3	Arrdc3	105171
10410721	arylsulfatase K	Arsk	77041
10578361	N-acylsphingosine amidohydrolase 1	Asah1	11886
10363007	activating signal cointegrator 1 complex subunit 3	Ascc3	77987
10363163	ASF1 anti-silencing function 1 homolog A (S. cerevisiae)	Asf1a	66403
10354555	asparagine synthetase domain containing 1	Asnsd1	70396
10388254	aspartoacylase	Aspa	11484
10405047	asporin	Aspn	66695
10467091	ATPase family, AAA domain containing 1	Atad1	67979
10428763	ATPase family, AAA domain containing 2	Atad2	70472
10394366	ATPase family, AAA domain containing 2B	Atad2b	320817
10394381	ATPase family, AAA domain containing 2B	Atad2b	320817
10568464	arginyltransferase 1	Ate1	11907
10426875	activating transcription factor 1	Atf1	11908
10435963	autophagy-related 3 (yeast)	Atg3	67841
10506134	autophagy-related 4C (yeast)	Atg4c	242557
10461078	atlastin GTPase 3	Atl3	109168
10491486	ATPase, class VI, type 11B	Atp11b	76295
10604799	ATPase, class VI, type 11C	Atp11c	320940
10438909	ATPase type 13A3	Atp13a3	224088
10438911	ATPase type 13A3	Atp13a3	224088
10366004	ATPase, Ca++ transporting, plasma membrane 1	Atp2b1	67972
10596347	ATPase, Ca++-sequestering	Atp2c1	235574
10598664	ATPase, H+ transporting, lysosomal accessory protein 2	Atp6ap2	70495
10511779	ATPase, H+ transporting, lysosomal V0 subunit D2	Atp6v0d2	242341
10423805	ATPase, H+ transporting, lysosomal V1 subunit C1	Atp6v1c1	66335
10401138	ATPase, H+ transporting, lysosomal V1 subunit D	Atp6v1d	73834
10344637	ATPase, H+ transporting, lysosomal V1 subunit H	Atp6v1h	108664
10486029	ATP binding domain 4	Atpbd4	66632
10587892	ataxia telangiectasia and Rad3 related	Atr	245000
10606263	alpha thalassemia/mental retardation syndrome X-linked homolog (human)	Atrx	22589
10402249	ataxin 3	Atxn3	110616
10593361	expressed sequence AU019823	AU019823	270156
10535508	expressed sequence AU022870	AU022870	231874
10539220	expressed sequence AW146020	AW146020	330361
10428310	antizyme inhibitor 1	Azin1	54375
10405535	RIKEN cDNA B230219D22 gene	B230219D22Rik	78521
10437236	RIKEN cDNA B230307C23 gene	B230307C23Rik	245305
10594800	RIKEN cDNA B230380D07 gene	B230380D07Rik	235461
10594802	RIKEN cDNA B230380D07 gene	B230380D07Rik	235461
10475414	beta-2 microglobulin	B2m	12010
10472436	UDP-Gal:betaGlcNAc beta 1,3-galactosyltransferase, polypeptide 1	B3galt1	26877
10350473	UDP-Gal:betaGlcNAc beta 1,3-galactosyltransferase, polypeptide 2	B3galt2	26878
10353533	beta-1,3-glucuronyltransferase 2 (glucuronosyltransferase S) /// stromal membrane-associated protein 1	B3gat2 /// Smap1	280645 /// 98366
10434291	UDP-GlcNAc:betaGal beta-1,3-N-acetylglucosaminyltransferase 5	B3gnt5	108105
10543213	RIKEN cDNA B630005N14 gene	B630005N14Rik	101148
10502335	B-cell scaffold protein with ankyrin repeats 1	Bank1	242248
10400357	bromodomain adjacent to zinc finger domain 1A	Baz1a	217578
10526319	bromodomain adjacent to zinc finger domain, 1B	Baz1b	22385
10472549	Bardet-Biedl syndrome 5 (human)	Bbs5	72569
10497842	Bardet-Biedl syndrome 7 (human)	Bbs7	71492
10439854	bobby sox homolog (Drosophila)	Bbx	70508
10442032	cDNA sequence BC002059	BC002059	213811
10358459	cDNA sequence BC003331	BC003331	226499
10404178	cDNA sequence BC005537	BC005537	79555
10367717	cDNA sequence BC013529	BC013529	215751
10407392	cDNA sequence BC016423	BC016423	105203
10442037	cDNA sequence BC018101 /// zinc finger protein 97 /// cDNA sequence BC002059	BC018101 /// Zfp97 /// BC002059	449000 /// 22759 /// 213811
10578027	cDNA sequence BC019943 /// MAK16 homolog (S. cerevisiae)	BC019943 /// Mak16	234138 /// 67920
10526783	cDNA sequence BC055004	BC055004	381680
10536061	cDNA sequence BC063263	BC063263	434178
10510081	cDNA sequence BC080695	BC080695	329986
10598180	cDNA sequence BC085271	BC085271	434632
10470893	cDNA sequence BC085271 /// SET translocation	BC085271 /// Set	434632 /// 56086
10587486	cDNA sequence BC085271 /// SET translocation	BC085271 /// Set	434632 /// 56086
10360370	cDNA sequence BC094916	BC094916	545384
10399874	B-cell receptor-associated protein 29	Bcap29	12033
10558325	BRCA2 and CDKN1A interacting protein	Bccip	66165
10498710	butyrylcholinesterase	Bche	12038
10361979	BCL2-associated transcription factor 1	Bclaf1	72567
10353775	BEN domain containing 6	Bend6	320705
10542959	blocked early in transport 1 homolog (S. cerevisiae)	Bet1	12068
10606868	brain expressed gene 1	Bex1	19716
10601844	basic helix-loop-helix domain containing, class B9	Bhlhb9	70237
10549276	basic helix-loop-helix family, member e41	Bhlhe41	79362
10542896	bicaudal D homolog 1 (Drosophila)	Bicd1	12121
10345967	basic, immunoglobulin-like variable motif containing	Bivm	246229
10469514	Bmi1 polycomb ring finger oncogene	Bmi1	12151
10523468	BMP2 inducible kinase	Bmp2k	140780
10419261	bone morphogenetic protein 4	Bmp4	12159
10547251	BMS1 homolog, ribosome assembly protein (yeast)	Bms1	213895
10586759	BCL2/adenovirus E1B interacting protein 2	Bnip2	12175
10529758	biorientation of chromosomes in cell division 1-like	Bod1l	665775
10392318	bromodomain PHD finger transcription factor	Bptf	207165
10580486	bromodomain containing 7	Brd7	26992
10389395	BRCA1 interacting protein C-terminal helicase 1	Brip1	237911
10395831	breast cancer metastasis-suppressor 1-like	Brms1l	52592
10462752	BTAF1 RNA polymerase II, B-TFIID transcription factor-associated, (Mot1 homolog, S. cerevisiae)	Btaf1	107182
10567022	BTB (POZ) domain containing 10	Btbd10	68815
10411287	basic transcription factor 3-like 4	Btf3l4	70533
10435982	B and T lymphocyte associated	Btla	208154
10487480	budding uninhibited by benzimidazoles 1 homolog (S. cerevisiae)	Bub1	12235
10427718	brix domain containing 2	Bxdc2	67832
10346523	basic leucine zipper and W2 domains 1	Bzw1	66882
10540141	RIKEN cDNA C130022K22 gene	C130022K22Rik	232236
10536369	core 1 synthase, glycoprotein-N-acetylgalactosamine 3-beta-galactosyltransferase, 1	C1galt1	94192
10604226	C1GALT1-specific chaperone 1	C1galt1c1	59048
10521616	C1q and tumor necrosis factor related protein 7	C1qtnf7	109323
10455372	RIKEN cDNA C330007P06 gene	C330007P06Rik	77644
10529260	RIKEN cDNA C330019G07 gene /// similar to CG6004-PB	C330019G07Rik /// LOC100039037	215476 /// 100039037
10436106	RIKEN cDNA C330027C09 gene	C330027C09Rik	224171
10547657	complement component 3a receptor 1	C3ar1	12267
10503359	RIKEN cDNA C430048L16 gene	C430048L16Rik	77604
10488437	RIKEN cDNA C530025M09 gene	C530025M09Rik	319470
10427436	complement component 7	C7	109828
10562548	expressed sequence C80913	C80913	19777
10480751	complement component 8, gamma polypeptide	C8g	69379
10443918	RIKEN cDNA C920016K16 gene	C920016K16Rik	240067
10347970	calcium binding protein 39	Cab39	12283
10559513	calcium binding protein 39	Cab39	12283
10415678	calcium binding protein 39-like	Cab39l	69008
10519815	calcium channel, voltage-dependent, alpha2/delta subunit 1	Cacna2d1	12293
10519855	calcium channel, voltage-dependent, alpha2/delta subunit 1	Cacna2d1	12293
10484371	calcitonin receptor-like	Calcrl	54598
10537184	caldesmon 1	Cald1	109624
10397752	calmodulin 1	Calm1	12313
10453451	calmodulin 2	Calm2	12314
10599461	calmodulin 2	Calm2	12314
10536818	calumenin	Calu	12321
10385599	calnexin	Canx	12330
10413771	calpain 7	Capn7	12339
10485514	cell cycle associated protein 1	Caprin1	53872
10349014	capping protein (actin filament) muscle Z-line, alpha 1	Capza1	12340
10500928	capping protein (actin filament) muscle Z-line, alpha 1	Capza1	12340
10536527	capping protein (actin filament) muscle Z-line, alpha 2	Capza2	12343
10475378	cancer susceptibility candidate 4	Casc4	319996
10536273	CAS1 domain containing 1	Casd1	213819
10603708	calcium/calmodulin-dependent serine protein kinase (MAGUK family)	Cask	12361
10582985	caspase 1	Casp1	12362
10583008	caspase 12	Casp12	12364
10571696	caspase 3	Casp3	12367
10582997	caspase 4, apoptosis-related cysteine peptidase	Casp4	12363
10346564	caspase 8	Casp8	12370
10410656	calpastatin	Cast	12380
10536499	caveolin 1, caveolae protein	Cav1	12389
10536494	caveolin 2	Cav2	12390
10466818	COBW domain containing 1	Cbwd1	226043
10380689	chromobox homolog 1 (Drosophila HP1 beta)	Cbx1	12412
10433088	chromobox homolog 5 (Drosophila HP1a)	Cbx5	12419
10521626	coiled-coil and C2 domain containing 2A	Cc2d2a	231214
10384811	coiled-coil domain containing 104	Ccdc104	216618
10578557	coiled-coil domain containing 111	Ccdc111	408022
10416533	coiled-coil domain containing 122	Ccdc122	108811
10406193	coiled-coil domain containing 127	Ccdc127	67433
10536176	coiled-coil domain containing 132	Ccdc132	73288
10416044	coiled-coil domain containing 25	Ccdc25	67179
10474437	coiled-coil domain containing 34	Ccdc34	68201
10365899	coiled-coil domain containing 41	Ccdc41	77048
10392087	coiled-coil domain containing 47	Ccdc47	67163
10388613	coiled-coil domain containing 55	Ccdc55	237859
10435489	coiled-coil domain containing 58	Ccdc58	381045
10366186	coiled-coil domain containing 59	Ccdc59	52713
10456545	coiled-coil domain containing 68	Ccdc68	381175
10447025	coiled-coil domain containing 75	Ccdc75	53951
10374842	coiled coil domain containing 88A	Ccdc88a	108686
10554926	coiled-coil domain containing 90B	Ccdc90b	66365
10379524	chemokine (C-C motif) ligand 11	Ccl11	20292
10379530	chemokine (C-C motif) ligand 12	Ccl12	20293
10379511	chemokine (C-C motif) ligand 2	Ccl2	20296
10389231	chemokine (C-C motif) ligand 3	Ccl3	20302
10389222	chemokine (C-C motif) ligand 6	Ccl6	20305
10503534	cyclin C	Ccnc	51813
10385271	cyclin G1	Ccng1	12450
10406482	cyclin H	Ccnh	66671
10349442	cyclin T2	Ccnt2	72949
10346960	cyclin Y-like 1	Ccnyl1	227210
10587012	cell cycle progression 1	Ccpg1	72278
10598004	chemokine (C-C motif) receptor 1	Ccr1	12768
10590631	chemokine (C-C motif) receptor 2	Ccr2	12772
10598013	chemokine (C-C motif) receptor 2 /// chemokine (C-C motif) receptor 5	Ccr2 /// Ccr5	12772 /// 12774
10372600	chaperonin containing Tcp1, subunit 2 (beta)	Cct2	12461
10526069	chaperonin containing Tcp1, subunit 6a (zeta)	Cct6a	12466
10362803	CD164 antigen	Cd164	53599
10406928	CD180 antigen	Cd180	17079
10435907	CD200 receptor 1	Cd200r1	57781
10435920	Cd200 receptor 2 /// RIKEN cDNA F630003A18 gene /// CD200 receptor 4	Cd200r2 /// F630003A18Rik /// Cd200r4	271375 /// 319823 /// 239849
10562132	CD22 antigen	Cd22	12483
10351644	CD244 natural killer cell receptor 2B4 /// similar to Natural killer cell receptor 2B4 precursor (NKR2B4) (NK cell type I receptor protein 2B4) (CD244 antigen) (Non MHC restricted killing associated)	Cd244 /// LOC677008	18106 /// 677008
10451004	CD2-associated protein	Cd2ap	12488
10392845	CD300 antigen like family member F /// similar to CD300 antigen like family member F	Cd300lf /// LOC100047115	246746 /// 100047115
10521678	CD38 antigen	Cd38	12494
10436182	CD47 antigen (Rh-related antigen, integrin-associated signal transducer)	Cd47	16423
10351658	CD48 antigen	Cd48	12506
10501063	CD53 antigen	Cd53	12508
10357488	CD55 antigen	Cd55	13136
10492964	CD5 antigen-like	Cd5l	11801
10351679	CD84 antigen	Cd84	12523
10420516	cytidine and dCMP deaminase domain containing 1	Cdadc1	71891
10479869	cell division cycle 123 homolog (S. cerevisiae)	Cdc123	98828
10392012	cell division cycle 27 homolog (S. cerevisiae)	Cdc27	217232
10511113	cell division cycle 2-like 1	Cdc2l1	12537
10462333	cell division cycle 37 homolog (S. cerevisiae)-like 1	Cdc37l1	67072
10368762	cell division cycle 40 homolog (yeast)	Cdc40	71713
10517559	cell division cycle 42 homolog (S. cerevisiae)	Cdc42	12540
10352194	CDC42 binding protein kinase alpha	Cdc42bpa	226751
10372743	cell division cycle 5-like (S. pombe)	Cdc5l	71702
10358359	cell division cycle 73, Paf1/RNA polymerase II complex component, homolog (S. cerevisiae)	Cdc73	214498
10423274	cadherin 18	Cdh18	320865
10423287	cadherin 18	Cdh18	320865
10357103	cadherin 19, type 2	Cdh19	227485
10527508	cyclin-dependent kinase 8	Cdk8	264064
10408455	CDK5 regulatory subunit associated protein 1-like 1	Cdkal1	68916
10375909	cyclin-dependent kinase-like 3	Cdkl3	213084
10607619	cyclin-dependent kinase-like 5	Cdkl5	382253
10578619	CDKN2A interacting protein	Cdkn2aip	70925
10510219	carnitine deficiency-associated gene expressed in ventricle 3	Cdv3	321022
10562416	CCAAT/enhancer binding protein (C/EBP), gamma	Cebpg	12611
10453006	CCAAT/enhancer binding protein zeta	Cebpz	12607
10530892	centromere protein C1	Cenpc1	12617
10450957	centromere protein Q	Cenpq	83815
10360479	centrosomal protein 170	Cep170	545389
10359086	centrosomal protein 350	Cep350	74081
10590892	centrosomal protein 57	Cep57	74360
10596119	centrosomal protein 63	Cep63	28135
10588091	centrosomal protein 70	Cep70	68121
10406426	centrin 3	Cetn3	12626
10581902	craniofacial development protein 1	Cfdp1	23837
10358339	complement component factor h	Cfh	12628
10384956	ChaC, cation transport regulator homolog 2 (E. coli)	Chac2	68044
10441987	chromodomain helicase DNA binding protein 1	Chd1	12648
10564573	chromodomain helicase DNA binding protein 2	Chd2	244059
10387316	chromodomain helicase DNA binding protein 3	Chd3	216848
10503172	chromodomain helicase DNA binding protein 7	Chd7	320790
10503174	chromodomain helicase DNA binding protein 7	Chd7	320790
10503212	chromodomain helicase DNA binding protein 7	Chd7	320790
10573823	chromodomain helicase DNA binding protein 9	Chd9	109151
10606513	choroidermia	Chm	12662
10456378	chromatin modifying protein 1B	Chmp1b	67064
10440307	chromatin modifying protein 2B	Chmp2b	68942
10504008	chromatin modifying protein 5	Chmp5	76959
10583347	cysteine and histidine-rich domain (CHORD)-containing, zinc-binding protein 1	Chordc1	66917
10467921	conserved helix-loop-helix ubiquitous kinase	Chuk	12675
10579101	cartilage intermediate layer protein 2	Cilp2	68709
10483667	corepressor interacting with RBPJ, 1	Cir1	66935
10521589	corepressor interacting with RBPJ, 1	Cir1	66935
10473919	cytoskeleton associated protein 5	Ckap5	75786
10495359	chloride channel CLIC-like 1	Clcc1	229725
10526514	claudin 15	Cldn15	60363
10542164	C-type lectin domain family 12, member a	Clec12a	232413
10541564	C-type lectin domain family 4, member a3	Clec4a3	73149
10548375	C-type lectin domain family 7, member a	Clec7a	56644
10375382	clathrin interactor 1	Clint1	216705
10533659	CAP-GLY domain containing linker protein 1	Clip1	56430
10375820	CDC like kinase 4	Clk4	12750
10530733	circadian locomoter output cycles kaput	Clock	12753
10586368	caseinolytic peptidase X (E.coli)	Clpx	270166
10515164	cytidine monophosphate (UMP-CMP) kinase 1	Cmpk1	66588
10372534	CCR4-NOT transcription complex, subunit 2	Cnot2	72068
10543904	CCR4-NOT transcription complex, subunit 4	Cnot4	53621
10385557	CCR4-NOT transcription complex, subunit 6	Cnot6	104625
10531529	CCR4-NOT transcription complex, subunit 6-like	Cnot6l	231464
10578287	CCR4-NOT transcription complex, subunit 7	Cnot7	18983
10540333	contactin 6	Cntn6	53870
10406757	collagen, type IV, alpha 3 (Goodpasture antigen) binding protein	Col4a3bp	68018
10453747	collectin sub-family member 12	Colec12	140792
10530434	COMM domain containing 8	Commd8	27784
10567049	coatomer protein complex, subunit beta 1	Copb1	70349
10588049	coatomer protein complex, subunit beta 2 (beta prime)	Copb2	50797
10487175	COP9 (constitutive photomorphogenic) homolog, subunit 2 (Arabidopsis thaliana)	Cops2	12848
10490989	ceruloplasmin	Cp	12870
10511739	copine III	Cpne3	70568
10457205	cAMP responsive element modulator	Crem	12916
10488303	Crn, crooked neck-like 1 (Drosophila)	Crnkl1	66877
10528102	carnitine O-octanoyltransferase	Crot	74114
10494839	cold shock domain containing E1, RNA binding	Csde1	229663
10478799	chromosome segregation 1-like (S. cerevisiae)	Cse1l	110750
10425066	colony stimulating factor 2 receptor, beta, low-affinity (granulocyte-macrophage)	Csf2rb	12983
10547217	chondroitin sulfate N-acetylgalactosaminyltransferase 2	Csgalnact2	78752
10456120	casein kinase 1, alpha 1	Csnk1a1	93687
10455769	casein kinase 1, gamma 3	Csnk1g3	70425
10350819	casein kinase 2, alpha 1 polypeptide	Csnk2a1	12995
10477073	casein kinase 2, alpha 1 polypeptide	Csnk2a1	12995
10344789	centrosome and spindle pole associated protein 1	Cspp1	211660
10344801	centrosome and spindle pole associated protein 1	Cspp1	211660
10344803	centrosome and spindle pole associated protein 1	Cspp1	211660
10344805	centrosome and spindle pole associated protein 1	Cspp1	211660
10344813	centrosome and spindle pole associated protein 1	Cspp1	211660
10344817	centrosome and spindle pole associated protein 1	Cspp1	211660
10344819	centrosome and spindle pole associated protein 1	Cspp1	211660
10474243	cleavage stimulation factor, 3' pre-RNA, subunit 3	Cstf3	228410
10395932	CTAGE family, member 5	Ctage5	217615
10574812	CCCTC-binding factor	Ctcf	13018
10475394	CTD (carboxy-terminal domain, RNA polymerase II, polypeptide A) small phosphatase like 2	Ctdspl2	329506
10467368	CTD (carboxy-terminal domain, RNA polymerase II, polypeptide A) small phosphatase like 2 /// predicted gene 3875 /// predicted gene, EG235855	Ctdspl2 /// Gm3875 /// EG235855	329506 /// 100042507 /// 235855
10513061	catenin (cadherin associated protein), alpha-like 1	Ctnnal1	54366
10554789	cathepsin C	Ctsc	13032
10410124	cathepsin L	Ctsl	13039
10492699	cathepsin O	Ctso	229445
10494271	cathepsin S	Ctss	13040
10537882	cullin 1	Cul1	26965
10453575	cullin 2	Cul2	71745
10356001	cullin 3	Cul3	26554
10604199	cullin 4B	Cul4b	72584
10593605	cullin 5	Cul5	75717
10583254	CWC15 homolog (S. cerevisiae)	Cwc15	66070
10473340	CWC22 spliceosome-associated protein homolog (S. cerevisiae)	Cwc22	80744
10484249	CWC22 spliceosome-associated protein homolog (S. cerevisiae)	Cwc22	80744
10582941	CWF19-like 2, cell cycle control (S. pombe)	Cwf19l2	244672
10523120	chemokine (C-X-C motif) ligand 5	Cxcl5	20311
10575153	cytochrome b5 type B	Cyb5b	66427
10511725	cytochrome b5 reductase 4	Cyb5r4	266690
10603551	cytochrome b-245, beta polypeptide	Cybb	13058
10573803	cylindromatosis (turban tumor syndrome)	Cyld	74256
10453057	cytochrome P450, family 1, subfamily b, polypeptide 1 /// RIKEN cDNA 1700038P13 gene	Cyp1b1 /// 1700038P13Rik	13078 /// 73265
10346747	cytochrome P450, family 20, subfamily A, polypeptide 1	Cyp20a1	77951
10445308	cytochrome P450, family 39, subfamily a, polypeptide 1	Cyp39a1	56050
10527920	cytochrome P450, family 51	Cyp51	13121
10497381	cytochrome P450, family 7, subfamily b, polypeptide 1	Cyp7b1	13123
10606355	cysteinyl leukotriene receptor 1	Cysltr1	58861
10413434	DNA segment, Chr 14, Abbott 1 expressed	D14Abb1e	218850
10419343	DNA segment, Chr 14, ERATO Doi 436, expressed	D14Ertd436e	218978
10424260	DNA segment, Chr 15, ERATO Doi 621, expressed	D15Ertd621e	210998
10440427	DNA segment, Chr 16, ERATO Doi 472, expressed	D16Ertd472e	67102
10466848	DNA segment, Chr 19, Brigham & Women's Genetics 1357 expressed	D19Bwg1357e	52874
10468802	DNA segment, Chr 19, ERATO Doi 737, expressed	D19Ertd737e	76539
10356932	DNA segment, Chr 1, ERATO Doi 622, expressed	D1Ertd622e	52392
10491877	DNA segment, Chr 3, ERATO Doi 751, expressed	D3Ertd751e	73852
10529567	DNA segment, Chr 5, ERATO Doi 579, expressed	D5Ertd579e	320661
10565900	RIKEN cDNA D630004N19 gene	D630004N19Rik	402747
10542006	DNA segment, Chr 6, Wayne State University 163, expressed	D6Wsu163e	28040
10535972	RIKEN cDNA D730045B01 gene	D730045B01Rik	77867
10523750	RIKEN cDNA D930016D06 gene	D930016D06Rik	100662
10590467	DNA segment, Chr 9, ERATO Doi 402, expressed	D9Ertd402e	382117
10396278	dishevelled associated activator of morphogenesis 1	Daam1	208846
10396270	dapper homolog 1, antagonist of beta-catenin (xenopus)	Dact1	59036
10357454	aspartyl-tRNA synthetase	Dars	226414
10472738	DDB1 and CUL4 associated factor 17	Dcaf17	75763
10497765	DCN1, defective in cullin neddylation 1, domain containing 1 (S. cerevisiae)	Dcun1d1	114893
10583034	DCN1, defective in cullin neddylation 1, domain containing 5 (S. cerevisiae)	Dcun1d5	76863
10399430	DEAD (Asp-Glu-Ala-Asp) box polypeptide 1	Ddx1	104721
10593508	DEAD (Asp-Glu-Ala-Asp) box polypeptide 10	Ddx10	77591
10369630	DEAD (Asp-Glu-Ala-Asp) box polypeptide 21	Ddx21	56200
10546760	DEAD/H (Asp-Glu-Ala-Asp/His) box polypeptide 3, X-linked	Ddx3x	13205
10598723	DEAD/H (Asp-Glu-Ala-Asp/His) box polypeptide 3, X-linked	Ddx3x	13205
10382049	DEAD (Asp-Glu-Ala-Asp) box polypeptide 42	Ddx42	72047
10405511	DEAD (Asp-Glu-Ala-Asp) box polypeptide 46	Ddx46	212880
10385484	DEAD (Asp-Glu-Ala-Asp) box polypeptide 5	Ddx5	13207
10392251	DEAD (Asp-Glu-Ala-Asp) box polypeptide 5	Ddx5	13207
10369647	DEAD (Asp-Glu-Ala-Asp) box polypeptide 50	Ddx50	94213
10379779	DEAD (Asp-Glu-Ala-Asp) box polypeptide 52	Ddx52	78394
10512067	DEAD (Asp-Glu-Ala-Asp) box polypeptide 58	Ddx58	230073
10584777	DEAD (Asp-Glu-Ala-Asp) box polypeptide 6	Ddx6	13209
10571984	DEAD (Asp-Glu-Ala-Asp) box polypeptide 60	Ddx60	234311
10409031	DEK oncogene (DNA binding)	Dek	110052
10515983	defects in morphology 1 homolog (S. cerevisiae)	Dem1	73172
10501051	DENN/MADD domain containing 2D /// choline/ethanolaminephosphotransferase 1	Dennd2d /// Cept1	72121 /// 99712
10586244	DENN/MADD domain containing 4A	Dennd4a	102442
10586246	DENN/MADD domain containing 4A	Dennd4a	102442
10586248	DENN/MADD domain containing 4A	Dennd4a	102442
10586250	DENN/MADD domain containing 4A	Dennd4a	102442
10586254	DENN/MADD domain containing 4A	Dennd4a	102442
10549504	DENN/MADD domain containing 5B	Dennd5b	320560
10525657	density-regulated protein	Denr	68184
10529995	DEAH (Asp-Glu-Ala-His) box polypeptide 15	Dhx15	13204
10407222	DEAH (Asp-Glu-Ala-His) box polypeptide 29	Dhx29	218629
10498415	DEAH (Asp-Glu-Ala-His) box polypeptide 36	Dhx36	72162
10389561	DEAH (Asp-Glu-Ala-His) box polypeptide 40	Dhx40	67487
10358849	DEAH (Asp-Glu-Ala-His) box polypeptide 9	Dhx9	13211
10533633	diablo homolog (Drosophila) /// UDP-GlcNAc:betaGal beta-1,3-N-acetylglucosaminyltransferase 4	Diablo /// B3gnt4	66593 /// 231727
10601616	diaphanous homolog 2 (Drosophila)	Diap2	54004
10407042	DIM1 dimethyladenosine transferase 1-like (S. cerevisiae)	Dimt1	66254
10421981	DIS3 mitotic control homolog (S. cerevisiae) /// progesterone immunomodulatory binding factor 1	Dis3 /// Pibf1	72662 /// 52023
10600485	dyskeratosis congenita 1, dyskerin homolog (human)	Dkc1	245474
10399825	dihydrolipoamide dehydrogenase	Dld	13382
10434942	discs, large homolog 1 (Drosophila) /// similar to Discs, large homolog 1 (Drosophila)	Dlg1 /// LOC100047603	13383 /// 100047603
10600604	dystrophin, muscular dystrophy	Dmd	13405
10528120	cyclin D binding myb-like transcription factor 1	Dmtf1	23857
10455602	Dmx-like 1	Dmxl1	240283
10521587	DnaJ (Hsp40) homolog, subfamily A, member 1	Dnaja1	15502
10580370	DnaJ (Hsp40) homolog, subfamily A, member 2	Dnaja2	56445
10434675	DnaJ (Hsp40) homolog, subfamily B, member 11	Dnajb11	67838
10395976	DnaJ (Hsp40) homolog, subfamily B, member 6	Dnajb6	23950
10481868	DnaJ (Hsp40) homolog, subfamily B, member 6	Dnajb6	23950
10585533	DnaJ (Hsp40) homolog, subfamily B, member 6	Dnajb6	23950
10480329	DnaJ (Hsp40) homolog, subfamily C, member 1	Dnajc1	13418
10473190	DnaJ (Hsp40) homolog, subfamily C, member 10	Dnajc10	66861
10596231	DnaJ (Hsp40) homolog, subfamily C, member 13	Dnajc13	235567
10596255	DnaJ (Hsp40) homolog, subfamily C, member 13	Dnajc13	235567
10596257	DnaJ (Hsp40) homolog, subfamily C, member 13	Dnajc13	235567
10596259	DnaJ (Hsp40) homolog, subfamily C, member 13	Dnajc13	235567
10596261	DnaJ (Hsp40) homolog, subfamily C, member 13	Dnajc13	235567
10596263	DnaJ (Hsp40) homolog, subfamily C, member 13	Dnajc13	235567
10596265	DnaJ (Hsp40) homolog, subfamily C, member 13	Dnajc13	235567
10596267	DnaJ (Hsp40) homolog, subfamily C, member 13	Dnajc13	235567
10596269	DnaJ (Hsp40) homolog, subfamily C, member 13	Dnajc13	235567
10596271	DnaJ (Hsp40) homolog, subfamily C, member 13	Dnajc13	235567
10596273	DnaJ (Hsp40) homolog, subfamily C, member 13	Dnajc13	235567
10596275	DnaJ (Hsp40) homolog, subfamily C, member 13	Dnajc13	235567
10596277	DnaJ (Hsp40) homolog, subfamily C, member 13	Dnajc13	235567
10596279	DnaJ (Hsp40) homolog, subfamily C, member 13	Dnajc13	235567
10596281	DnaJ (Hsp40) homolog, subfamily C, member 13	Dnajc13	235567
10427704	DnaJ (Hsp40) homolog, subfamily C, member 21	Dnajc21	78244
10417034	DnaJ (Hsp40) homolog, subfamily C, member 3	Dnajc3	100037258
10508727	DnaJ (Hsp40) homolog, subfamily C, member 8	Dnajc8	68598
10417829	DnaJ (Hsp40) homolog, subfamily C, member 9	Dnajc9	108671
10437992	dynamin 1-like	Dnm1l	74006
10394209	DNA methyltransferase 3A	Dnmt3a	13435
10495773	deoxynucleotidyltransferase, terminal, interacting protein 2	Dnttip2	99480
10356020	dedicator of cytokinesis 10	Dock10	210293
10599120	dedicator of cytokinesis 11	Dock11	75974
10586284	dipeptidylpeptidase 8	Dpp8	74388
10351293	dermatopontin	Dpt	56429
10591816	dpy-19-like 1 (C. elegans)	Dpy19l1	244745
10511541	dpy-19-like 4 (C. elegans)	Dpy19l4	381510
10523955	down-regulator of transcription 1	Dr1	13486
10357115	dermatan sulfate epimerase-like	Dsel	319901
10399882	dihydrouridine synthase 4-like (S. cerevisiae)	Dus4l	71916
10413243	double homeobox B-like /// predicted gene 10394	Duxbl /// Gm10394	278672 /// 100039227
10472764	dynein cytoplasmic 1 intermediate chain 2	Dync1i2	13427
10589913	dynein cytoplasmic 1 light intermediate chain 1	Dync1li1	235661
10603567	dynein light chain Tctex-type 3	Dynlt3	67117
10439798	DAZ interacting protein 3, zinc finger	Dzip3	224170
10410302	RIKEN cDNA E130120F12 gene	E130120F12Rik	629016
10498477	RIKEN cDNA E130311K13 gene	E130311K13Rik	329659
10490894	E2F transcription factor 5	E2f5	13559
10428877	RIKEN cDNA E430025E21 gene	E430025E21Rik	223593
10400326	E2F-associated phosphoprotein	Eapp	66266
10598175	eosinophil-associated, ribonuclease A family, member 1 /// eosinophil-associated, ribonuclease A family, member 10 /// eosinophil-associated, ribonuclease A family, member 2 /// eosinophil-associated, ribonuclease A family, member 3 /// eosinophil-associated, ribonuclease A family, member 12	Ear1 /// Ear10 /// Ear2 /// Ear3 /// Ear12	13586 /// 93725 /// 13587 /// 53876 /// 503845
10414262	eosinophil-associated, ribonuclease A family, member 2	Ear2	13587
10424050	estrogen receptor-binding fragment-associated gene 9	Ebag9	55960
10362379	enoyl Coenzyme A hydratase domain containing 1 /// ring finger protein 146	Echdc1 /// Rnf146	52665 /// 68031
10368486	enoyl Coenzyme A hydratase domain containing 1 /// ring finger protein 146	Echdc1 /// Rnf146	52665 /// 68031
10405033	extracellular matrix protein 2, female organ and adipocyte specific	Ecm2	407800
10404783	endothelin 1	Edn1	13614
10365933	early endosome antigen 1	Eea1	216238
10565486	embryonic ectoderm development	Eed	13626
10420457	EF hand domain family A1	Efha1	68514
10571384	EF-hand domain family, member A2	Efha2	78506
10424439	EFR3 homolog A (S. cerevisiae)	Efr3a	76740
10351504	predicted gene, EG665955	EG665955	665955
10455533	eukaryotic translation initiation factor 1A	Eif1a	13664
10602795	eukaryotic translation initiation factor 1A, Y-linked	Eif1ay	66235
10492205	eukaryotic translation initiation factor 2a	Eif2a	229317
10452980	eukaryotic translation initiation factor 2-alpha kinase 2	Eif2ak2	19106
10396795	eukaryotic translation initiation factor 2, subunit 1 alpha	Eif2s1	13665
10488806	eukaryotic translation initiation factor 2, subunit 2 (beta)	Eif2s2	67204
10605740	eukaryotic translation initiation factor 2, subunit 3, structural gene X-linked	Eif2s3x	26905
10468828	eukaryotic translation initiation factor 3, subunit A	Eif3a	13669
10428398	eukaryotic translation initiation factor 3, subunit E	Eif3e	16341
10458680	eukaryotic translation initiation factor 3, subunit J	Eif3j	78655
10475405	eukaryotic translation initiation factor 3, subunit J	Eif3j	78655
10485635	eukaryotic translation initiation factor 3, subunit M	Eif3m	98221
10599855	eukaryotic translation initiation factor 4E	Eif4e	13684
10398678	eukaryotic translation initiation factor 5	Eif5	217869
10345626	eukaryotic translation initiation factor 5B	Eif5b	226982
10416657	E74-like factor 1	Elf1	13709
10406254	elongation factor RNA polymerase II 2	Ell2	192657
10579976	ELMO domain containing 2	Elmod2	244548
10495993	ELOVL family member 6, elongation of long chain fatty acids (yeast)	Elovl6	170439
10407327	embigin	Emb	13723
10447141	echinoderm microtubule associated protein like 4	Eml4	78798
10451054	ectonucleotide pyrophosphatase/phosphodiesterase 4	Enpp4	224794
10417461	predicted gene, ENSMUSG00000068790 /// RIKEN cDNA 2610042L04 gene /// RIKEN cDNA 5033421C21 gene /// hypothetical LOC100036569 /// hypothetical LOC623078 /// RIKEN cDNA D830030K20 gene /// predicted gene, 544988 /// predicted gene, ENSMUSG00000072735 /// RIKEN cDNA 4930555G01 gene /// predicted gene 3512 /// RIKEN cDNA 1700001E04 gene /// predicted gene 3642 /// alpha7-takusan /// predicted gene,…	ENSMUSG00000068790 /// 2610042L04Rik /// 5033421C21Rik /// LOC100036569 /// LOC623078 /// D830030K20Rik /// 544988 /// ENSMUSG00000072735 /// 4930555G01Rik /// Gm3512 /// 1700001E04Rik /// Gm3642 /// LOC100038847 /// ENSMUSG00000063277 /// Gm10338 /// Gm3020 /// Gm8108 /// Gm3138 /// Gm8265 /// Gm3187 /// Gm3194 /// Gm3248 /// Gm8206 /// LOC100041530 /// 100041874 /// B930046C15Rik /// Gm3703 ///…	545007 /// 554327 /// 75963 /// 100036569 /// 623078 /// 320333 /// 544988 /// 100041151 /// 108978 /// 100041791 /// 75438 /// 100042054 /// 100038847 /// 545015 /// 100042304 /// 100040880 /// 666442 /// 100041100 /// 666740 /// 100041184 /// 100041195 /// 100041279 /// 666637 /// 100041530 /// 100041874 /// 544998 /// 100042164 /// 100042207 /// 671957 /// 675467 /// 100036568 /// 545001 /// 1…
10362245	erythrocyte protein band 4.1-like 2	Epb4.1l2	13822
10446553	erythrocyte protein band 4.1-like 3	Epb4.1l3	13823
10471978	enhancer of polycomb homolog 2 (Drosophila)	Epc2	227867
10440258	Eph receptor A3	Epha3	13837
10352514	glutamyl-prolyl-tRNA synthetase	Eprs	107508
10506939	epidermal growth factor receptor pathway substrate 15	Eps15	13858
10416566	epithelial stromal interaction 1 (breast)	Epsti1	108670
10406205	endoplasmic reticulum aminopeptidase 1	Erap1	80898
10411853	Erbb2 interacting protein	Erbb2ip	59079
10547410	ELKS/RAB6-interacting/CAST family member 1	Erc1	111173
10578193	exoribonuclease 1	Eri1	67276
10419198	ERO1-like (S. cerevisiae)	Ero1l	50527
10512851	endoplasmic reticulum protein 44	Erp44	76299
10457465	establishment of cohesion 1 homolog 1 (S. cerevisiae)	Esco1	77805
10407040	establishment of cohesion 1 homolog 1 (S. cerevisiae) /// predicted gene 7054	Esco1 /// Gm7054	77805 /// 631097
10488108	ESF1, nucleolar pre-rRNA processing protein, homolog (S. cerevisiae)	Esf1	66580
10407281	endothelial cell-specific molecule 1	Esm1	71690
10384486	Ewing's tumor-associated antigen 1	Etaa1	68145
10458213	eukaryotic translation termination factor 1	Etf1	225363
10388958	ecotropic viral integration site 2b /// ecotropic viral integration site 2a	Evi2b /// Evi2a	216984 /// 14017
10532133	ecotropic viral integration site 5	Evi5	14020
10424070	Ewing sarcoma breakpoint region 1 /// predicted gene 7517	Ewsr1 /// Gm7517	14030 /// 665146
10408490	exocyst complex component 2	Exoc2	66482
10419370	exocyst complex component 5	Exoc5	105504
10462822	exocyst complex component 6	Exoc6	107371
10545780	exocyst complex component 6B	Exoc6b	75914
10498168	exosome component 8	Exosc8	69639
10491551	exosome component 9 /// cyclin A2	Exosc9 /// Ccna2	50911 /// 12428
10508614	fatty acid binding protein 3, muscle and heart	Fabp3	14077
10490838	fatty acid binding protein 5-like 2 /// fatty acid binding protein 5, epidermal	Fabp5l2 /// Fabp5	622384 /// 16592
10588083	Fas apoptotic inhibitory molecule	Faim	23873
10554569	family with sequence similarity 103, member A1	Fam103a1	67148
10584758	family with sequence similarity 103, member A1	Fam103a1	67148
10461723	family with sequence similarity 111, member A	Fam111a	107373
10522060	family with sequence similarity 114, member A1	Fam114a1	68303
10458098	family with sequence similarity 13, member B	Fam13b	225358
10420023	family with sequence similarity 158, member A	Fam158a	85308
10490802	family with sequence similarity 164, member A	Fam164a	67306
10406385	family with sequence similarity 172, member A	Fam172a	68675
10558274	family with sequence similarity 175, member B	Fam175b	109359
10463404	family with sequence similarity 178, member A	Fam178a	226151
10463410	family with sequence similarity 178, member A	Fam178a	226151
10395984	family with sequence similarity 179, member B	Fam179b	328108
10379989	family with sequence similarity 33, member A	Fam33a	66140
10418905	family with sequence similarity 35, member A	Fam35a	75698
10360542	family with sequence similarity 36, member A /// hypothetical LOC100270747	Fam36a /// LOC100270747	66359 /// 100270747
10543319	family with sequence similarity 3, member C	Fam3c	27999
10464415	family with sequence similarity 45, member A	Fam45a	67894
10595402	family with sequence similarity 46, member A	Fam46a	212943
10394593	family with sequence similarity 49, member A	Fam49a	76820
10428983	family with sequence similarity 49, member B	Fam49b	223601
10600403	family with sequence similarity 50, member A	Fam50a	108160
10532150	family with sequence similarity 69, member A	Fam69a	67266
10583228	family with sequence similarity 76, member B	Fam76b	72826
10447065	family with sequence similarity 82, member A1	Fam82a1	381110
10511617	family with sequence similarity 92, member A	Fam92a	68099
10586484	family with sequence similarity 96, member A	Fam96a	68250
10474689	family with sequence similarity 98, member B	Fam98b	68215
10384782	Fanconi anemia, complementation group L /// vaccinia related kinase 2	Fancl /// Vrk2	67030 /// 69922
10483081	fibroblast activation protein	Fap	14089
10556491	fatty acyl CoA reductase 1	Far1	67420
10549402	fatty acyl CoA reductase 2 /// ERGIC and golgi 2	Far2 /// Ergic2	330450 /// 67456
10355931	phenylalanyl-tRNA synthetase, beta subunit	Farsb	23874
10529801	F-box and leucine-rich repeat protein 5	Fbxl5	242960
10453461	F-box protein 11	Fbxo11	225055
10474207	F-box protein 3	Fbxo3	57443
10428796	F-box protein 32	Fbxo32	67731
10361375	F-box protein 5	Fbxo5	67141
10571849	F-box protein 8	Fbxo8	50753
10500335	Fc receptor, IgG, high affinity I	Fcgr1	14129
10360028	Fc receptor, IgG, low affinity IIb	Fcgr2b	14130
10351509	Fc receptor, IgG, low affinity IV	Fcgr4	246256
10411464	FCH domain only 2	Fcho2	218503
10555438	FCH and double SH3 domains 2	Fchsd2	207278
10458808	fem-1 homolog c (C.elegans)	Fem1c	240263
10419223	fermitin family homolog 2 (Drosophila)	Fermt2	218952
10446351	fer (fms/fps related) protein kinase, testis specific 2	Fert2	14158
10438017	FYVE, RhoGEF and PH domain containing 4	Fgd4	224014
10475643	fibroblast growth factor 7	Fgf7	14178
10542745	FGFR1 oncogene partner 2	Fgfr1op2	67529
10519983	fibrinogen-like protein 2	Fgl2	14190
10595298	filamin A interacting protein 1	Filip1	70598
10483865	FK506 binding protein 7	Fkbp7	14231
10472097	formin-like 2	Fmnl2	71409
10359582	flavin containing monooxygenase 2	Fmo2	55990
10359593	flavin containing monooxygenase 3	Fmo3	14262
10599893	fragile X mental retardation syndrome 1 homolog	Fmr1	14265
10501860	formin binding protein 1-like	Fnbp1l	214459
10376144	folliculin interacting protein 1	Fnip1	216742
10404407	forkhead box C1	Foxc1	17300
10402063	forkhead box N3	Foxn3	71375
10536444	forkhead box P2	Foxp2	114142
10578377	FSHD region gene 1	Frg1	14300
10362499	fyn-related kinase	Frk	14302
10484307	frizzled-related protein	Frzb	20378
10435641	follistatin-like 1	Fstl1	14314
10392098	FtsJ homolog 3 (E. coli)	Ftsj3	56095
10361790	fucosidase, alpha-L- 2, plasma	Fuca2	66848
10603785	FUN14 domain containing 1	Fundc1	72018
10407993	FUS interacting protein (serine-arginine rich) 1	Fusip1	14105
10509113	FUS interacting protein (serine-arginine rich) 1	Fusip1	14105
10396712	fucosyltransferase 8	Fut8	53618
10491455	fragile X mental retardation gene 1, autosomal homolog	Fxr1	14359
10422760	FYN binding protein	Fyb	23880
10435149	forty-two-three domain containing 1	Fyttd1	69823
10395612	G2/M-phase specific E3 ubiquitin ligase	G2e3	217558
10436678	GA repeat binding protein, alpha	Gabpa	14390
10604961	gamma-aminobutyric acid (GABA) A receptor, subunit alpha 3	Gabra3	14396
10545130	growth arrest and DNA-damage-inducible 45 alpha	Gadd45a	13197
10454310	UDP-N-acetyl-alpha-D-galactosamine:polypeptide N-acetylgalactosaminyltransferase 1	Galnt1	14423
10578771	UDP-N-acetyl-alpha-D-galactosamine: polypeptide N-acetylgalactosaminyltransferase 7	Galnt7	108150
10351039	growth arrest specific 5	Gas5	14455
10487011	glycine amidinotransferase (L-arginine:glycine amidinotransferase)	Gatm	67092
10436500	glucan (1,4-alpha-), branching enzyme 1	Gbe1	74185
10496592	guanylate binding protein 2	Gbp2	14469
10496580	guanylate binding protein 3	Gbp3	55932
10496555	guanylate binding protein 5 /// guanylate binding protein 1 /// similar to guanylate nucleotide binding protein 1	Gbp5 /// Gbp1 /// LOC100048720	229898 /// 14468 /// 100048720
10418991	granule cell antiserum positive 14	Gcap14	72972
10363241	GRIP and coiled-coil domain containing 2	Gcc2	70297
10466659	guanine deaminase	Gda	14544
10403258	guanosine diphosphate (GDP) dissociation inhibitor 2	Gdi2	14569
10389590	glycerophosphodiester phosphodiesterase domain containing 1	Gdpd1	66569
10447097	gem (nuclear organelle) associated protein 6	Gemin6	67242
10541091	gem (nuclear organelle) associated protein 6	Gemin6	67242
10458183	glial cell line derived neurotrophic factor family receptor alpha 3	Gfra3	14587
10503523	gamma-glutamyl hydrolase	Ggh	14590
10389308	gametogenetin binding protein 2	Ggnbp2	217039
10407833	geranylgeranyl diphosphate synthase 1	Ggps1	14593
10348201	GRB10 interacting GYF protein 2	Gigyf2	227331
10409660	G kinase anchoring protein 1	Gkap1	56278
10564220	G kinase anchoring protein 1	Gkap1	56278
10606714	galactosidase, alpha	Gla	11605
10354472	glutaminase	Gls	14660
10503281	glycosyltransferase 8 domain containing 3	Glt8d3	223827
10360664	predicted gene 10001	Gm10001	791296
10579049	predicted gene 10033	Gm10033	378466
10579052	predicted gene 10033	Gm10033	378466
10397528	predicted gene 10045 /// ribosomal protein L21	Gm10045 /// Rpl21	100043348 /// 19933
10520965	predicted gene 10461 /// Yamaguchi sarcoma viral (v-yes) oncogene homolog 1	Gm10461 /// Yes1	100038480 /// 22612
10394800	predicted gene 10480 /// BCL2/adenovirus E1B interacting protein 3-like	Gm10480 /// Bnip3l	100043324 /// 12177
10421003	predicted gene 10480 /// BCL2/adenovirus E1B interacting protein 3-like	Gm10480 /// Bnip3l	100043324 /// 12177
10453759	predicted gene 10554	Gm10554	100038541
10559467	predicted gene 10693 /// predicted gene 15448 /// paired-Ig-like receptor A2 /// paired-Ig-like receptor A3 /// paired-Ig-like receptor A4 /// similar to PIRA2 /// paired-Ig-like receptor A6 /// paired-Ig-like receptor A11 /// paired-Ig-like receptor A1 /// paired-Ig-like receptor A7 /// leukocyte immunoglobulin-like receptor, subfamily B (with TM and ITIM domains), member 3	Gm10693 /// Gm15448 /// Pira2 /// Pira3 /// Pira4 /// LOC100046578 /// Pira6 /// Pira11 /// Pira1 /// Pira7 /// Lilrb3	675749 /// 100041146 /// 18725 /// 18726 /// 18727 /// 100046578 /// 18729 /// 18724 /// 18722 /// 18730 /// 18733
10365199	predicted gene 10778	Gm10778	100233208
10408935	predicted gene 10786	Gm10786	100038539
10435961	predicted gene 10808	Gm10808	100038470
10476819	gene model 114	Gm114	228730
10379727	predicted gene 11428	Gm11428	100034251
10503376	predicted gene 11818	Gm11818	208820
10473008	predicted gene 11847 /// heterogeneous nuclear ribonucleoprotein A3	Gm11847 /// Hnrnpa3	545592 /// 229279
10515113	predicted gene 11847 /// heterogeneous nuclear ribonucleoprotein A3	Gm11847 /// Hnrnpa3	545592 /// 229279
10600593	predicted gene 11847 /// heterogeneous nuclear ribonucleoprotein A3	Gm11847 /// Hnrnpa3	545592 /// 229279
10513404	predicted gene 12542	Gm12542	100038512
10510230	predicted gene 13152 /// predicted gene 13154	Gm13152 /// Gm13154	195531 /// 433804
10510150	predicted gene 13212 /// predicted gene 13154	Gm13212 /// Gm13154	433801 /// 433804
10517081	predicted gene 13213	Gm13213	545683
10510225	predicted gene 13235 /// predicted gene 13151	Gm13235 /// Gm13151	385211 /// 666581
10510178	predicted gene 13235 /// predicted gene 13225 /// predicted gene 13212 /// predicted gene 13251 /// predicted gene 13051 /// predicted gene 13151 /// predicted gene 13154 /// predicted gene 13159 /// predicted gene 13157 /// reduced expression 2	Gm13235 /// Gm13225 /// Gm13212 /// Gm13251 /// Gm13051 /// Gm13151 /// Gm13154 /// Gm13159 /// Gm13157 /// Rex2	385211 /// 622846 /// 433801 /// 433791 /// 626316 /// 666581 /// 433804 /// 100043100 /// 100041677 /// 19715
10518346	predicted gene 13235 /// predicted gene 13251 /// predicted gene 13051 /// predicted gene, OTTMUSG00000010657 /// predicted gene 13151 /// predicted gene 13159 /// RIKEN cDNA 1700029I01 gene	Gm13235 /// Gm13251 /// Gm13051 /// OTTMUSG00000010657 /// Gm13151 /// Gm13159 /// 1700029I01Rik	385211 /// 433791 /// 626316 /// 666532 /// 666581 /// 100043100 /// 70005
10490250	predicted gene 14295 /// RIKEN cDNA 2810021G02 gene /// predicted gene, OTTMUSG00000016609 /// predicted gene 14434 /// similar to zinc finger protein 14 /// RIKEN cDNA 0610010B08 gene /// RIKEN cDNA 3100002L24 gene	Gm14295 /// 2810021G02Rik /// OTTMUSG00000016609 /// Gm14434 /// LOC627901 /// 0610010B08Rik /// 3100002L24Rik	100039123 /// 353208 /// 668030 /// 668039 /// 627901 /// 100039060 /// 626832
10479221	predicted gene 14403	Gm14403	433520
10490273	predicted gene 14410 /// predicted gene, OTTMUSG00000016609 /// predicted gene, 100043387 /// predicted gene 14434 /// RIKEN cDNA 0610010B08 gene	Gm14410 /// OTTMUSG00000016609 /// 100043387 /// Gm14434 /// 0610010B08Rik	100043403 /// 668030 /// 100043387 /// 668039 /// 100039060
10490294	predicted gene 14418 /// predicted gene 14403 /// predicted gene 14322 /// predicted gene 14325 /// RIKEN cDNA 3100002L24 gene /// ethanol induced 1 /// RIKEN cDNA 2810021G02 gene /// predicted gene, OTTMUSG00000016609 /// predicted gene 14434 /// RIKEN cDNA 0610010B08 gene	Gm14418 /// Gm14403 /// Gm14322 /// Gm14325 /// 3100002L24Rik /// Etohi1 /// 2810021G02Rik /// OTTMUSG00000016609 /// Gm14434 /// 0610010B08Rik	668066 /// 433520 /// 626802 /// 329575 /// 626832 /// 626848 /// 353208 /// 668030 /// 668039 /// 100039060
10479217	predicted gene 14420	Gm14420	628308
10473109	predicted gene 14461	Gm14461	329436
10602341	predicted gene 15128 /// predicted gene, OTTMUSG00000019001 /// leucine zipper protein 4 /// predicted gene 10439 /// predicted gene 15097 /// predicted gene 15091 /// ovary testis transcribed /// predicted gene 15127 /// predicted gene 15085	Gm15128 /// OTTMUSG00000019001 /// Luzp4 /// Gm10439 /// Gm15097 /// Gm15091 /// Ott /// Gm15127 /// Gm15085	434863 /// 434864 /// 434865 /// 382243 /// 434869 /// 382244 /// 18422 /// 434866 /// 100039934
10558740	DnaJ-like protein	Gm15542	100043546
10401829	eukaryotic translation initiation factor 1A pseudogene /// predicted gene, EG435337 /// eukaryotic translation initiation factor 1A pseudogene /// predicted gene 4027 /// eukaryotic translation initiation factor 1A	Gm16368 /// EG435337 /// Gm5039 /// Gm4027 /// Eif1a	100039226 /// 435337 /// 266459 /// 100042776 /// 13664
10583195	predicted gene 16485	Gm16485	791396
10397541	predicted gene 2056 /// eukaryotic translation initiation factor 1A pseudogene /// eukaryotic translation initiation factor 1A pseudogene /// predicted gene 4027 /// eukaryotic translation initiation factor 1A	Gm2056 /// Gm16368 /// Gm5039 /// Gm4027 /// Eif1a	100039129 /// 100039226 /// 266459 /// 100042776 /// 13664
10454099	mortality factor 4 like 1 pseudogene /// mortality factor 4 like 1	Gm4835 /// Morf4l1	225228 /// 21761
10458757	mortality factor 4 like 1 pseudogene /// mortality factor 4 like 1	Gm4835 /// Morf4l1	225228 /// 21761
10463153	mortality factor 4 like 1 pseudogene /// mortality factor 4 like 1	Gm4835 /// Morf4l1	225228 /// 21761
10455954	predicted gene 4951	Gm4951	240327
10594752	predicted gene 4978 /// ribosomal protein L7a pseudogene /// similar to ribosomal protein L7a /// ribosomal protein L7A	Gm4978 /// Gm4970 /// LOC677073 /// Rpl7a	244913 /// 243872 /// 677073 /// 27176
10476939	predicted gene 4979 /// zinc finger protein 442	Gm4979 /// Zfp442	245174 /// 668923
10414173	predicted gene 5203	Gm5203	382871
10350504	predicted gene 5263	Gm5263	383571
10435991	predicted gene 5406	Gm5406	385905
10385504	predicted gene 5431	Gm5431	432555
10440292	predicted gene 5488	Gm5488	433036
10464445	predicted gene 5521	Gm5521	433261
10562657	predicted gene 5595	Gm5595	434179
10363917	predicted gene 5778	Gm5778	544705
10522301	predicted gene 5867	Gm5867	545756
10344622	predicted gene 6123	Gm6123	620009
10601456	predicted gene 6377	Gm6377	622976
10350590	predicted gene 6597	Gm6597	625534
10438726	predicted gene 6640	Gm6640	625969
10384795	cytochrome b5 domain containing 1 pseudogene /// cytochrome b5 domain containing 1	Gm6685 /// Cyb5d1	626571 /// 327951
10387363	cytochrome b5 domain containing 1 pseudogene /// cytochrome b5 domain containing 1	Gm6685 /// Cyb5d1	626571 /// 327951
10346549	predicted gene 6901 /// chromobox homolog 3 (Drosophila HP1 gamma)	Gm6901 /// Cbx3	628648 /// 12417
10405868	predicted gene 6901 /// chromobox homolog 3 (Drosophila HP1 gamma)	Gm6901 /// Cbx3	628648 /// 12417
10405888	predicted gene 6901 /// chromobox homolog 3 (Drosophila HP1 gamma)	Gm6901 /// Cbx3	628648 /// 12417
10421573	predicted gene 6901 /// chromobox homolog 3 (Drosophila HP1 gamma)	Gm6901 /// Cbx3	628648 /// 12417
10538282	predicted gene 6901 /// chromobox homolog 3 (Drosophila HP1 gamma)	Gm6901 /// Cbx3	628648 /// 12417
10400710	predicted gene 71	Gm71	207965
10579839	ribosomal protein L21 pseudogene /// predicted gene 10045 /// predicted gene 6919 /// predicted gene 16416 /// ribosomal protein L21 pseudogene /// Rpl21 pseudogene /// ribosomal protein L21 pseudogene /// ribosomal protein L21 pseudogene /// predicted gene 6813 /// predicted gene 9104 /// ribosomal protein L21	Gm7218 /// Gm10045 /// Gm6919 /// Gm16416 /// Gm7062 /// Gm8054 /// Gm16376 /// Gm7806 /// Gm6813 /// Gm9104 /// Rpl21	637748 /// 100043348 /// 628822 /// 432801 /// 631359 /// 666340 /// 100043646 /// 665821 /// 627939 /// 668319 /// 19933
10548116	calmodulin 2 pseudogene	Gm7308	640703
10420986	ribosomal protein L21 pseudogene /// predicted gene 5528 /// ribosomal protein L21	Gm7806 /// Gm5528 /// Rpl21	665821 /// 433319 /// 19933
10412755	predicted gene 8471 /// similar to casein kinase II, alpha 1 polypeptide	Gm8471 /// LOC677611	667125 /// 677611
10372104	predicted gene 8613	Gm8613	667407
10368370	predicted gene 8681	Gm8681	667519
10601581	predicted gene 8833 /// RIKEN cDNA 9230105E10 gene /// predicted gene 4992	Gm8833 /// 9230105E10Rik /// Gm4992	667823 /// 319236 /// 245575
10382106	predicted gene 885	Gm885	380732
10566583	predicted gene 8995	Gm8995	668139
10423575	predicted gene 9643	Gm9643	675463
10578683	predicted gene 9892 /// eukaryotic translation initiation factor 2, subunit 2 (beta)	Gm9892 /// Eif2s2	100040220 /// 67204
10462111	predicted gene 9938	Gm9938	791290
10545940	germ cell-less homolog 1 (Drosophila)	Gmcl1	23885
10419274	glia maturation factor, beta	Gmfb	63985
10492381	guanine monphosphate synthetase	Gmps	229363
10501265	guanine nucleotide binding protein (G protein), alpha inhibiting 3	Gnai3	14679
10538842	guanine nucleotide binding protein (G protein), gamma 12	Gng12	14701
10508019	guanine nucleotide binding protein-like 2 (nucleolar)	Gnl2	230737
10418480	guanine nucleotide binding protein-like 3 (nucleolar)	Gnl3	30877
10607302	guanine nucleotide binding protein-like 3 (nucleolar)-like	Gnl3l	237107
10530380	glucosamine-6-phosphate deaminase 2	Gnpda2	67980
10419216	glucosamine-phosphate N-acetyltransferase 1	Gnpnat1	54342
10460108	glucosamine-phosphate N-acetyltransferase 1	Gnpnat1	54342
10365601	N-acetylglucosamine-1-phosphate transferase, alpha and beta subunits	Gnptab	432486
10482273	golgi autoantigen, golgin subfamily a, 1	Golga1	76899
10524124	golgi autoantigen, golgin subfamily a, 3	Golga3	269682
10590004	golgi autoantigen, golgin subfamily a, 4	Golga4	54214
10397866	golgi autoantigen, golgin subfamily a, 5	Golga5	27277
10435543	golgi autoantigen, golgin subfamily b, macrogolgin 1	Golgb1	224139
10498775	golgi integral membrane protein 4	Golim4	73124
10423172	golgi phosphoprotein 3	Golph3	66629
10494288	golgi phosphoprotein 3-like	Golph3l	229593
10388579	golgi SNAP receptor complex member 1	Gosr1	53334
10391746	G patch domain containing 8	Gpatch8	237943
10412082	GC-rich promoter binding protein 1	Gpbp1	73274
10507299	GC-rich promoter binding protein 1-like 1	Gpbp1l1	77110
10538187	glycoprotein (transmembrane) nmb	Gpnmb	93695
10407803	G protein-coupled receptor 137B	Gpr137b	83924
10407792	G protein-coupled receptor 137B, pseudogene /// G protein-coupled receptor 137B	Gpr137b-ps /// Gpr137b	664862 /// 83924
10598750	G protein-coupled receptor 34	Gpr34	23890
10397645	G-protein coupled receptor 65	Gpr65	14744
10501402	G-protein signalling modulator 2 (AGS3-like, C. elegans)	Gpsm2	76123
10412207	glutathione peroxidase 8 (putative)	Gpx8	69590
10483163	growth factor receptor bound protein 14	Grb14	50915
10531133	G-rich RNA sequence binding factor 1	Grsf1	231413
10435676	glycogen synthase kinase 3 beta	Gsk3b	56637
10437748	G1 to S phase transition 1	Gspt1	14852
10401882	general transcription factor II A, 1	Gtf2a1	83602
10571288	general transcription factor II E, polypeptide 2 (beta subunit)	Gtf2e2	68153
10553280	general transcription factor II H, polypeptide 1	Gtf2h1	14884
10411646	general transcription factor II H, polypeptide 2	Gtf2h2	23894
10354630	general transcription factor IIIC, polypeptide 3	Gtf3c3	98488
10368739	general transcription factor IIIC, polypeptide 6, alpha	Gtf3c6	67371
10527970	GTP-binding protein 10 (putative)	Gtpbp10	207704
10578069	GTP-binding protein 10 (putative)	Gtpbp10	207704
10407543	GTP binding protein 4	Gtpbp4	69237
10439634	GTP-binding protein 8 (putative)	Gtpbp8	66067
10498935	guanylate cyclase 1, soluble, beta 3	Gucy1b3	54195
10522303	GUF1 GTPase homolog (S. cerevisiae)	Guf1	231279
10346000	GULP, engulfment adaptor PTB domain containing 1	Gulp1	70676
10566578	GTPase, very large interferon inducible 1	Gvin1	74558
10502801	histocompatibility 28	H28	15061
10450675	histocompatibility 2, T region locus 24	H2-T24	15042
10411776	H3 histone, family 3A /// predicted gene 12657	H3f3a /// Gm12657	15078 /// 667250
10393058	H3 histone, family 3B	H3f3b	15081
10500896	H3 histone, family 3B	H3f3b	15081
10362974	HECT domain and ankyrin repeat containing, E3 ubiquitin protein ligase 1	Hace1	209462
10365769	histidine ammonia lyase	Hal	15109
10406519	hyaluronan and proteoglycan link protein 1	Hapln1	12950
10472782	histone aminotransferase 1	Hat1	107435
10475211	HAUS augmin-like complex, subunit 2	Haus2	66296
10514201	HAUS augmin-like complex, subunit 6	Haus6	230376
10375443	hepatitis A virus cellular receptor 2	Havcr2	171285
10566254	hemoglobin, beta adult major chain /// hemoglobin, beta adult minor chain	Hbb-b1 /// Hbb-b2	15129 /// 15130
10607933	holocytochrome c synthetase	Hccs	15159
10362520	histone deacetylase 2	Hdac2	15182
10400210	HECT domain containing 1	Hectd1	207304
10363641	hect domain and RLD 4	Herc4	67345
10411373	hexosaminidase B	Hexb	15212
10519857	hepatocyte growth factor	Hgf	15234
10346235	3-hydroxyisobutyryl-Coenzyme A hydrolase	Hibch	227095
10396421	hypoxia inducible factor 1, alpha subunit	Hif1a	15251
10356936	histidine acid phosphatase domain containing 1	Hisppd1	227399
10491014	helicase-like transcription factor	Hltf	20585
10424413	high-mobility group (nonhistone chromosomal) protein 1-like 1 /// high mobility group box 1	Hmg1l1 /// Hmgb1	434174 /// 15289
10429455	high-mobility group (nonhistone chromosomal) protein 1-like 1 /// high mobility group box 1	Hmg1l1 /// Hmgb1	434174 /// 15289
10453252	high-mobility group (nonhistone chromosomal) protein 1-like 1 /// high mobility group box 1	Hmg1l1 /// Hmgb1	434174 /// 15289
10462361	high-mobility group (nonhistone chromosomal) protein 1-like 1 /// high mobility group box 1	Hmg1l1 /// Hmgb1	434174 /// 15289
10582835	high-mobility group (nonhistone chromosomal) protein 1-like 1 /// high mobility group box 1	Hmg1l1 /// Hmgb1	434174 /// 15289
10600545	high-mobility group (nonhistone chromosomal) protein 1-like 1 /// high mobility group box 1	Hmg1l1 /// Hmgb1	434174 /// 15289
10455439	high mobility group box 1	Hmgb1	15289
10500543	high mobility group box 1	Hmgb1	15289
10535894	high mobility group box 1	Hmgb1	15289
10566142	high mobility group box 1	Hmgb1	15289
10569994	high mobility group box 1	Hmgb1	15289
10591881	high mobility group box 1	Hmgb1	15289
10604663	high mobility group box 1	Hmgb1	15289
10552337	high mobility group box 1-like /// high-mobility group (nonhistone chromosomal) protein 1-like 1 /// high mobility group box 1	Hmgb1l /// Hmg1l1 /// Hmgb1	625781 /// 434174 /// 15289
10497483	high mobility group box 1-like /// high mobility group box 1	Hmgb1l /// Hmgb1	625781 /// 15289
10571250	high mobility group box 1, related sequence 17	Hmgb1-rs17	628431
10571870	high mobility group box 2	Hmgb2	97165
10595371	high mobility group nucleosomal binding domain 3	Hmgn3	94353
10572897	heme oxygenase (decycling) 1	Hmox1	15368
10417411	hematological and neurological expressed 1-like /// RIKEN cDNA B930046C15 gene /// predicted gene, 544988 /// predicted gene, ENSMUSG00000072735 /// alpha7-takusan /// predicted gene, ENSMUSG00000063277 /// predicted gene 3020 /// predicted gene 3242 /// hypothetical protein LOC671957 /// hypothetical LOC100036568 /// predicted gene, ENSMUSG00000079376	Hn1l /// B930046C15Rik /// 544988 /// ENSMUSG00000072735 /// LOC100038847 /// ENSMUSG00000063277 /// Gm3020 /// Gm3242 /// LOC671957 /// LOC100036568 /// ENSMUSG00000079376	52009 /// 544998 /// 544988 /// 100041151 /// 100038847 /// 545015 /// 100040880 /// 100041268 /// 671957 /// 100036568 /// 545001
10480459	histamine N-methyltransferase	Hnmt	140483
10597969	heterogeneous nuclear ribonucleoprotein A1 /// heterogeneous nuclear ribonucleoprotein A1 pseudogene	Hnrnpa1 /// Gm10052	15382 /// 654467
10602173	heterogeneous nuclear ribonucleoprotein A1 /// heterogeneous nuclear ribonucleoprotein A1 pseudogene /// heterogeneous nuclear ribonucleoprotein A1 pseudogene	Hnrnpa1 /// Gm5643 /// Gm10052	15382 /// 434858 /// 654467
10406226	heterogeneous nuclear ribonucleoprotein A1-like 2 /// similar to Heterogeneous nuclear ribonucleoprotein A1 (Helix-destabilizing protein) (Single-strand binding protein) (hnRNP core protein A1) (HDP-1) (Topoisomerase-inhibitor suppressed)	Hnrnpa1l2 /// LOC634350	544954 /// 634350
10544720	heterogeneous nuclear ribonucleoprotein A2/B1	Hnrnpa2b1	53379
10531633	heterogeneous nuclear ribonucleoprotein D	Hnrnpd	11991
10604501	heterogeneous nuclear ribonucleoprotein F	Hnrnpf	98758
10375735	heterogeneous nuclear ribonucleoprotein H1	Hnrnph1	59013
10490773	heterogeneous nuclear ribonucleoprotein H2	Hnrnph2	56258
10601760	heterogeneous nuclear ribonucleoprotein H2	Hnrnph2	56258
10369704	heterogeneous nuclear ribonucleoprotein H3	Hnrnph3	432467
10410970	heterogeneous nuclear ribonucleoprotein K	Hnrnpk	15387
10554701	heterogeneous nuclear ribonucleoprotein K	Hnrnpk	15387
10450006	heterogeneous nuclear ribonucleoprotein M /// membrane-associated ring finger (C3HC4) 2	Hnrnpm /// March2	76936 /// 224703
10509228	heterogeneous nuclear ribonucleoprotein R	Hnrnpr	74326
10360544	heterogeneous nuclear ribonucleoprotein U	Hnrnpu	51810
10461220	heterogeneous nuclear ribonucleoprotein U-like 2	Hnrnpul2	68693
10453082	heterogeneous nuclear ribonucleoprotein L-like	Hnrpll	72692
10419867	homeodomain leucine zipper-encoding gene	Homez	239099
10577922	hook homolog 3 (Drosophila)	Hook3	320191
10571840	hydroxyprostaglandin dehydrogenase 15 (NAD)	Hpgd	15446
10545101	hematopoietic prostaglandin D synthase	Hpgds	54486
10599627	hypoxanthine guanine phosphoribosyl transferase 1	Hprt1	15452
10428081	heat-responsive protein 12	Hrsp12	15473
10363195	heat shock factor 2	Hsf2	15500
10378848	heat shock protein 90, alpha (cytosolic), class A member 1	Hsp90aa1	15519
10402615	heat shock protein 90, alpha (cytosolic), class A member 1	Hsp90aa1	15519
10490946	heat shock protein 90, alpha (cytosolic), class A member 1	Hsp90aa1	15519
10371482	heat shock protein 90, beta (Grp94), member 1	Hsp90b1	22027
10440388	heat shock protein 70 family, member 13	Hspa13	110920
10479775	heat shock protein 14	Hspa14	50497
10385790	heat shock protein 4	Hspa4	15525
10491780	heat shock protein 4 like	Hspa4l	18415
10354732	heat shock protein 1 (chaperonin)	Hspd1	15510
10375240	heat shock protein 1 (chaperonin)	Hspd1	15510
10599781	HIV TAT specific factor 1	Htatsf1	72459
10356305	5-hydroxytryptamine (serotonin) receptor 2B	Htr2b	15559
10462621	RIKEN cDNA I830012O16 gene	I830012O16Rik	667370
10595407	inhibitor of Bruton agammaglobulinemia tyrosine kinase	Ibtk	108837
10399691	inhibitor of DNA binding 2	Id2	15902
10404975	inhibitor of DNA binding 4	Id4	15904
10467230	insulin degrading enzyme	Ide	15925
10355214	isocitrate dehydrogenase 1 (NADP+), soluble	Idh1	15926
10482762	isopentenyl-diphosphate delta isomerase	Idi1	319554
10360391	interferon activated gene 203	Ifi203	15950
10360382	interferon activated gene 204 /// myeloid cell nuclear differentiation antigen	Ifi204 /// Mnda	15951 /// 381308
10360406	interferon activated gene 205	Ifi205	226695
10502791	interferon-induced protein 44	Ifi44	99899
10483110	interferon induced with helicase C domain 1	Ifih1	71586
10462623	interferon-induced protein with tetratricopeptide repeats 1	Ifit1	15957
10462613	interferon-induced protein with tetratricopeptide repeats 2	Ifit2	15958
10361897	interferon gamma receptor 1	Ifngr1	15979
10436169	intraflagellar transport 57 homolog (Chlamydomonas)	Ift57	73916
10505931	intraflagellar transport 74 homolog (Chlamydomonas)	Ift74	67694
10498599	intraflagellar transport 80 homolog (Chlamydomonas)	Ift80	68259
10533504	intraflagellar transport 81 homolog (Chlamydomonas)	Ift81	12589
10600973	immunoglobulin (CD79A) binding protein 1	Igbp1	18518
10365559	insulin-like growth factor 1	Igf1	16000
10498379	immunoglobulin superfamily, member 10	Igsf10	242050
10567580	immunoglobulin superfamily, member 6	Igsf6	80719
10455961	interferon inducible GTPase 1	Iigp1	60440
10454966	IK cytokine	Ik	24010
10497996	IKAROS family zinc finger 5	Ikzf5	67143
10568529	IKAROS family zinc finger 5	Ikzf5	67143
10545135	interleukin 12 receptor, beta 2	Il12rb2	16162
10599174	interleukin 13 receptor, alpha 1	Il13ra1	16164
10566050	interleukin 18 binding protein	Il18bp	16068
10487588	interleukin 1 alpha	Il1a	16175
10345762	interleukin 1 receptor, type I	Il1r1	16177
10462442	interleukin 33	Il33	77125
10520452	interleukin 6	Il6	16193
10427628	interleukin 7 receptor	Il7r	16197
10497285	inositol (myo)-1(or 4)-monophosphatase 1	Impa1	55980
10536620	inhibitor of growth family, member 3	Ing3	71777
10357280	insulin induced gene 2	Insig2	72999
10496159	integrator complex subunit 12	Ints12	71793
10411974	importin 11	Ipo11	76582
10417070	importin 5	Ipo5	70572
10556216	importin 7	Ipo7	233726
10549447	importin 8	Ipo8	320727
10507286	IAP promoted placental gene	Ipp	16351
10435525	IQ calmodulin-binding motif containing 1	Iqcb1	320299
10587495	interleukin-1 receptor-associated kinase 1 binding protein 1	Irak1bp1	65099
10585444	iron responsive element binding protein 2	Ireb2	64602
10477604	itchy, E3 ubiquitin protein ligase	Itch	16396
10580391	integrin alpha FG-GAP repeat containing 1	Itfg1	71927
10472820	integrin alpha 6	Itga6	16403
10576661	integrin beta 1 (fibronectin receptor beta)	Itgb1	16412
10417212	integrin, beta-like 1	Itgbl1	223272
10454525	IWS1 homolog (S. cerevisiae)	Iws1	73473
10514668	Janus kinase 1	Jak1	16451
10462363	Janus kinase 2	Jak2	16452
10591967	junction adhesion molecule 3	Jam3	83964
10544148	jumonji C domain-containing histone demethylase 1 homolog D (S. cerevisiae)	Jhdm1d	338523
10544150	jumonji C domain-containing histone demethylase 1 homolog D (S. cerevisiae)	Jhdm1d	338523
10363706	jumonji domain containing 1C	Jmjd1c	108829
10492402	potassium voltage-gated channel, shaker-related subfamily, beta member 1	Kcnab1	16497
10529937	Kv channel interacting protein 4	Kcnip4	80334
10350438	potassium channel, subfamily T, member 2	Kcnt2	240776
10354286	KDEL (Lys-Asp-Glu-Leu) containing 1	Kdelc1	72050
10541216	lysine (K)-specific demethylase 5A	Kdm5a	214899
10598798	4lysine (K)-specific demethylase 6A	Kdm6a	22289
10516706	KH domain containing, RNA binding, signal transduction associated 1	Khdrbs1	20218
10574436	KH domain containing, RNA binding, signal transduction associated 1	Khdrbs1	20218
10488156	kinesin family member 16B	Kif16b	16558
10412011	kinesin family member 2A	Kif2a	16563
10376033	kinesin family member 3A	Kif3a	16568
10477297	kinesin family member 3B	Kif3b	16569
10457273	kinesin family member 5B	Kif5b	16573
10351140	kinesin-associated protein 3	Kifap3	16579
10572800	Kruppel-like factor 2 (lung)	Klf2	16598
10520096	kelch-like 7 (Drosophila)	Klhl7	52323
10438681	kininogen 2	Kng2	385643
10420637	karyopherin (importin) alpha 3	Kpna3	16648
10498623	karyopherin (importin) alpha 4	Kpna4	16649
10549256	v-Ki-ras2 Kirsten rat sarcoma viral oncogene homolog	Kras	16653
10538970	lysine-rich coiled-coil 1	Krcc1	57896
10519392	KRIT1, ankyrin repeat containing	Krit1	79264
10366350	KRR1, small subunit (SSU) processome component, homolog (yeast)	Krr1	52705
10414374	kinectin 1	Ktn1	16709
10565479	lethal, Chr 7, Rinchik 6	l7Rn6	67669
10594652	lactamase, beta	Lactb	80907
10353181	lactamase, beta 2	Lactb2	212442
10559486	leukocyte-associated Ig-like receptor 1	Lair1	52855
10604187	lysosomal-associated membrane protein 2	Lamp2	16784
10502029	La ribonucleoprotein domain family, member 7	Larp7	28036
10458607	leucyl-tRNA synthetase	Lars	107045
10478048	lipopolysaccharide binding protein	Lbp	16803
10407766	lectin, galactose binding, soluble 8	Lgals8	56048
10402268	legumain	Lgmn	19141
10522134	lipoic acid synthetase	Lias	79464
10576946	ligase IV, DNA, ATP-dependent	Lig4	319583
10363082	leukocyte immunoglobulin-like receptor, subfamily B, member 4	Lilrb4	14728
10363070	leukocyte immunoglobulin-like receptor, subfamily B, member 4 /// glycoprotein 49 A	Lilrb4 /// Gp49a	14728 /// 14727
10363265	LIM and senescent cell antigen-like domains 1	Lims1	110829
10531707	lin-54 homolog (C. elegans)	Lin54	231506
10474411	lin-7 homolog C (C. elegans)	Lin7c	22343
10467139	lysosomal acid lipase A	Lipa	16889
10354054	lipoyltransferase 1 /// MIT, microtubule interacting and transport, domain containing 1	Lipt1 /// Mitd1	623661 /// 69028
10366640	LLP homolog, long-term synaptic facilitation (Aplysia)	Llph	66225
10603702	LLP homolog, long-term synaptic facilitation (Aplysia)	Llph	66225
10459481	lectin, mannose-binding, 1	Lman1	70361
10422980	LMBR1 domain containing 2	Lmbrd2	320506
10483770	limb and neural patterns	Lnp	69605
10448094	leucyl/cystinyl aminopeptidase	Lnpep	240028
10440467	ribosomal protein L21 pseudogene /// ribosomal protein L21 pseudogene /// ribosomal protein L21	LOC100042767 /// Gm5810 /// Rpl21	100042767 /// 545172 /// 19933
10443492	ribosomal protein L21 pseudogene /// ribosomal protein L21 pseudogene /// predicted gene 10045 /// predicted gene 9104 /// ribosomal protein L21 pseudogene /// ribosomal protein L21 pseudogene /// predicted gene 16416 /// ribosomal protein L21 pseudogene /// ribosomal protein L21 pseudogene /// Rpl21 pseudogene /// ribosomal protein L21 pseudogene /// ribosomal protein L21 pseudogene /// ribosoma…	LOC100042767 /// Gm7218 /// Gm10045 /// Gm9104 /// Gm5495 /// Gm5816 /// Gm16416 /// Gm5201 /// Gm7062 /// Gm8054 /// Gm16376 /// Gm7806 /// Rpl21 /// Gm6813	100042767 /// 637748 /// 100043348 /// 668319 /// 433125 /// 545226 /// 432801 /// 382843 /// 631359 /// 666340 /// 100043646 /// 665821 /// 19933 /// 627939
10552118	similar to SMT3B protein	LOC100044517	100044517
10386195	similar to olfactory receptor (MOR275-3) pseudogene	LOC100044660	100044660
10607429	pol polyprotein	LOC280487	280487
10517486	similar to heterogeneous nuclear ribonucleoprotein A3	LOC433770	433770
10425046	similar to heterogeneous nuclear ribonucleoprotein A3	LOC626711	626711
10519713	hypothetical protein LOC635773	LOC635773	635773
10514383	similar to multi sex combs CG12058-PA /// La ribonucleoprotein domain family, member 7	LOC664902 /// Larp7	664902 /// 28036
10608422	similar to Rmi1 protein /// RMI1, RecQ mediated genome instability 1, homolog (S. cerevisiae)	LOC665550 /// Rmi1	665550 /// 74386
10410136	similar to Peptidyl-prolyl cis-trans isomerase A (PPIase) (Rotamase) (Cyclophilin A) (Cyclosporin A-binding protein) (SP18)	LOC674402	674402
10607225	leucine-rich repeats and calponin homology (CH) domain containing 2	Lrch2	210297
10500876	leucine-rich repeats and immunoglobulin-like domains 2	Lrig2	269473
10453334	leucine-rich PPR-motif containing	Lrpprc	72416
10495562	leucine rich repeat containing 39	Lrrc39	109245
10497105	leucine rich repeat containing 40	Lrrc40	67144
10490872	leucine rich repeat and coiled-coil domain containing 1	Lrrcc1	71710
10461251	LRRN4 C-terminal like	Lrrn4cl	68852
10391572	LSM12 homolog (S. cerevisiae)	Lsm12	268490
10562382	LSM14 homolog A (SCD6, S. cerevisiae)	Lsm14a	67070
10536595	LSM8 homolog, U6 small nuclear RNA associated (S. cerevisiae)	Lsm8	76522
10364194	lanosterol synthase	Lss	16987
10589703	lactotransferrin	Ltf	17002
10367931	LTV1 homolog (S. cerevisiae)	Ltv1	353258
10537397	LUC7-like 2 (S. cerevisiae)	Luc7l2	192196
10365983	lumican	Lum	17022
10404606	lymphocyte antigen 86	Ly86	17084
10360158	lymphocyte antigen 9	Ly9	17085
10344966	lymphocyte antigen 96	Ly96	17087
10521555	Ly1 antibody reactive clone	Lyar	17089
10344624	lysophospholipase 1	Lypla1	18777
10542714	LYR motif containing 5	Lyrm5	67636
10406419	LysM, putative peptidoglycan-binding, domain containing 3	Lysmd3	80289
10372652	lysozyme 1	Lyz1	17110
10372648	lysozyme 2	Lyz2	17105
10463263	leucine zipper transcription factor-like 1	Lztfl1	93730
10597973	leucine zipper transcription factor-like 1	Lztfl1	93730
10541484	mannose-6-phosphate receptor, cation dependent /// mannose-6-phosphate receptor, pseudogene	M6pr /// M6pr-ps	17113 /// 17114
10538832	MAD2 mitotic arrest deficient-like 1 (yeast)	Mad2l1	56150
10489246	v-maf musculoaponeurotic fibrosarcoma oncogene family, protein B (avian)	Mafb	16658
10506736	mago-nashi homolog, proliferation-associated (Drosophila)	Magoh	17149
10548565	mago-nashi homolog B (Drosophila)	Magohb	66441
10606301	magnesium transporter 1	Magt1	67075
10424113	mal, T-cell differentiation protein 2	Mal2	105853
10466712	MAM domain containing 2	Mamdc2	71738
10500614	mannosidase, alpha, class 1A, member 2	Man1a2	17156
10511881	mannosidase, endo-alpha	Manea	242362
10598771	monoamine oxidase A	Maoa	17161
10387014	mitogen-activated protein kinase kinase 4	Map2k4	26398
10367728	mitogen-activated protein kinase kinase kinase 7 interacting protein 2	Map3k7ip2	68652
10600688	mitogen-activated protein kinase kinase kinase 7 interacting protein 3	Map3k7ip3	66724
10400762	mitogen-activated protein kinase kinase kinase kinase 5	Map4k5	399510
10375634	mitogen-activated protein kinase 9	Mapk9	26420
10477353	microtubule-associated protein, RP/EB family, member 1	Mapre1	13589
10472277	membrane-associated ring finger (C3HC4) 7	March7	57438
10368675	myristoylated alanine rich protein kinase C substrate	Marcks	17118
10423599	matrilin 2	Matn2	17181
10454809	matrin 3	Matr3	17184
10400460	MAP3K12 binding inhibitory protein 1	Mbip	217588
10406423	metallo-beta-lactamase domain containing 2	Mblac2	72852
10607539	membrane-bound transcription factor peptidase, site 2 /// Yy2 transcription factor	Mbtps2 /// Yy2	270669 /// 100073351
10437945	minichromosome maintenance deficient 4 homolog (S. cerevisiae)	Mcm4	17217
10496771	mucolipin 2	Mcoln2	68279
10599335	malignant T cell amplified sequence 1	Mcts1	68995
10536472	MyoD family inhibitor domain containing	Mdfic	16543
10405753	malic enzyme 1, NADP(+)-dependent, cytosolic	Me1	17436
10595480	malic enzyme 1, NADP(+)-dependent, cytosolic	Me1	17436
10459730	malic enzyme 2, NAD(+)-dependent, mitochondrial	Me2	107029
10497590	MDS1 and EVI1 complex locus	Mecom	14013
10542750	mediator complex subunit 21	Med21	108098
10401335	mediator of RNA polymerase II transcription, subunit 6 homolog (yeast)	Med6	69792
10375439	mediator complex subunit 7	Med7	66213
10406434	myocyte enhancer factor 2C	Mef2c	17260
10452860	mediator of cell motility 1	Memo1	76890
10475890	c-mer proto-oncogene tyrosine kinase	Mertk	17289
10371987	methionine aminopeptidase 2	Metap2	56307
10501909	methyltransferase like 14	Mettl14	210529
10486867	microfibrillar-associated protein 1B /// microfibrillar-associated protein 1A	Mfap1b /// Mfap1a	100034361 /// 67532
10491363	mitofusin 1	Mfn1	67414
10361065	major facilitator superfamily domain containing 7B	Mfsd7b	226844
10396074	mannoside acetylglucosaminyltransferase 2	Mgat2	217664
10354003	mannoside acetylglucosaminyltransferase 4, isoenzyme A	Mgat4a	269181
10598198	melanoma inhibitory activity 3	Mia3	338366
10506397	mesoderm induction early response 1 homolog (Xenopus laevis	Mier1	71148
10436428	myc induced nuclear antigen /// beta-gamma crystallin domain containing 3	Mina /// Crybg3	67014 /// 224273
10536376	missing oocyte, meiosis regulator, homolog (Drosophila)	Mios	252875
10378024	MIS12 homolog (yeast)	Mis12	67139
10540265	microphthalmia-associated transcription factor	Mitf	17342
10568714	antigen identified by monoclonal antibody Ki 67	Mki67	17345
10537078	muskelin 1, intracellular mediator containing kelch motifs	Mkln1	27418
10520048	myeloid/lymphoid or mixed-lineage leukemia 5	Mll5	69188
10514255	myeloid/lymphoid or mixed-lineage leukemia (trithorax homolog, Drosophila); translocated to, 3	Mllt3	70122
10492355	membrane metallo endopeptidase	Mme	17380
10604687	membrane magnesium transporter 1	Mmgt1	236792
10583112	matrix metallopeptidase 27	Mmp27	234911
10583100	matrix metallopeptidase 8	Mmp8	17394
10396372	menage a trois 1	Mnat1	17420
10397895	modulator of apoptosis 1 /// ubiquitin protein ligase E3 component n-recognin 7 (putative)	Moap1 /// Ubr7	64113 /// 66622
10539421	MOB1, Mps One Binder kinase activator-like 1B (yeast)	Mobkl1b	232157
10346310	MOB1, Mps One Binder kinase activator-like 3 (yeast)	Mobkl3	19070
10407307	molybdenum cofactor synthesis 2	Mocs2	17434
10437023	microrchidia 3	Morc3	338467
10604630	motile sperm domain containing 1	Mospd1	70380
10607774	motile sperm domain containing 2	Mospd2	76763
10461721	macrophage expressed gene 1	Mpeg1	17476
10564313	M-phase phosphoprotein 10 (U3 small nucleolar ribonucleoprotein)	Mphosph10	67973
10582074	M phase phosphoprotein 6	Mphosph6	68533
10605370	membrane protein, palmitoylated	Mpp1	17524
10396778	membrane protein, palmitoylated 5 (MAGUK p55 subfamily member 5)	Mpp5	56217
10457357	membrane protein, palmitoylated 7 (MAGUK p55 subfamily member 7)	Mpp7	75739
10433702	Mpv17 transgene, kidney disease mutant-like	Mpv17l	93734
10358982	major histocompatibility complex, class I-related	Mr1	15064
10469358	mannose receptor, C type 1	Mrc1	17533
10523365	mitochondrial ribosomal protein L1	Mrpl1	94061
10512901	mitochondrial ribosomal protein L50	Mrpl50	28028
10595900	mitochondrial ribosomal protein S22	Mrps22	64655
10466190	membrane-spanning 4-domains, subfamily A, member 14	Ms4a14	383435
10461587	membrane-spanning 4-domains, subfamily A, member 4A	Ms4a4a	666907
10461594	membrane-spanning 4-domains, subfamily A, member 4C	Ms4a4c	64380
10461622	membrane-spanning 4-domains, subfamily A, member 6B	Ms4a6b	69774
10461614	membrane-spanning 4-domains, subfamily A, member 6C	Ms4a6c	73656
10466210	membrane-spanning 4-domains, subfamily A, member 6D	Ms4a6d	68774
10466200	membrane-spanning 4-domains, subfamily A, member 7	Ms4a7	109225
10447395	mutS homolog 2 (E. coli)	Msh2	17685
10607910	male-specific lethal 3 homolog (Drosophila)	Msl3	17692
10578264	macrophage scavenger receptor 1	Msr1	20288
10372807	methionine sulfoxide reductase B3	Msrb3	320183
10574023	metallothionein 2	Mt2	17750
10505894	methylthioadenosine phosphorylase	Mtap	66902
10423577	metadherin	Mtdh	67154
10527918	mitochondrial transcription termination factor /// predicted gene 9897	Mterf /// Gm9897	545725 /// 208595
10410264	MTERF domain containing 1	Mterfd1	66410
10371396	MTERF domain containing 3	Mterfd3	74238
10523905	metal response element binding transcription factor 2	Mtf2	17765
10601583	methylenetetrahydrofolate dehydrogenase (NADP+ dependent) 2-like	Mthfd2l	665563
10374880	mitochondrial translational initiation factor 2	Mtif2	76784
10599976	X-linked myotubular myopathy gene 1	Mtm1	17772
10599997	myotubularin related protein 1	Mtmr1	53332
10415700	myotubularin related protein 6	Mtmr6	219135
10543944	myotrophin	Mtpn	14489
10361366	mitochondrial translational release factor 1-like	Mtrf1l	108853
10578324	mitochondrial tumor suppressor 1	Mtus1	102103
10414449	MU-2/AP1M2 domain containing, death-inducing	Mudeng	74385
10601980	melanoma associated antigen (mutated) 1-like 1	Mum1l1	245631
10445214	methylmalonyl-Coenzyme A mutase	Mut	17850
10491231	myoneurin	Mynn	80732
10586781	myosin IE	Myo1e	71602
10587107	myosin VA	Myo5a	17918
10585956	myosin IXa	Myo9a	270163
10585970	myosin IXa	Myo9a	270163
10585972	myosin IXa	Myo9a	270163
10585974	myosin IXa	Myo9a	270163
10585976	myosin IXa	Myo9a	270163
10585978	myosin IXa	Myo9a	270163
10585980	myosin IXa	Myo9a	270163
10585982	myosin IXa	Myo9a	270163
10585984	myosin IXa	Myo9a	270163
10585986	myosin IXa	Myo9a	270163
10585988	myosin IXa	Myo9a	270163
10585990	myosin IXa	Myo9a	270163
10585992	myosin IXa	Myo9a	270163
10514441	myb-like, SWIRM and MPN domains 1	Mysm1	320713
10535946	NEDD4 binding protein 2-like 2	N4bp2l2	381695
10436698	N-6 adenine-specific DNA methyltransferase 1 (putative)	N6amt1	67768
10531370	N-acylethanolamine acid amidase	Naaa	67111
10591139	N-acetylated alpha-linked acidic dipeptidase 2	Naalad2	72560
10354494	Ngfi-A binding protein 1	Nab1	17936
10581111	NEDD8 activating enzyme E1 subunit 1	Nae1	234664
10411611	NLR family, apoptosis inhibitory protein 5 /// NLR family, apoptosis inhibitory protein 7 /// baculoviral IAP repeat-containing 1f	Naip5 /// Naip7 /// Birc1f	17951 /// 53880 /// 17952
10395259	nicotinamide phosphoribosyltransferase	Nampt	59027
10488550	N-acetylneuraminic acid phosphatase	Nanp	67311
10528332	N-acyl phosphatidylethanolamine phospholipase D	Napepld	242864
10491922	NMDA receptor-regulated gene 1	Narg1	74838
10459405	asparaginyl-tRNA synthetase	Nars	70223
10515337	nuclear autoantigenic sperm protein (histone-binding)	Nasp	50927
10414460	N-acetyltransferase 12	Nat12	70646
10435821	N-acetyltransferase 13	Nat13	72117
10572089	N-acetyltransferase 2 (arylamine N-acetyltransferase)	Nat2	17961
10346722	neurobeachin like 1	Nbeal1	269198
10503431	nibrin	Nbn	27354
10434998	nuclear cap binding protein subunit 2	Ncbp2	68092
10491083	arylacetamide deacetylase-like 1	Nceh1	320024
10484318	NCK-associated protein 1	Nckap1	50884
10356312	nucleolin	Ncl	17975
10384824	non-protein coding RNA 117	Ncrna00117	67939
10486284	NADH dehydrogenase (ubiquinone) 1 alpha subcomplex, assembly factor 1	Ndufaf1	69702
10412054	NADH dehydrogenase (ubiquinone) 1 alpha subcomplex, assembly factor 2	Ndufaf2	75597
10503643	NADH dehydrogenase (ubiquinone) 1 alpha subcomplex, assembly factor 4	Ndufaf4	68493
10371907	neural precursor cell expressed, developmentally down-regulated gene 1	Nedd1	17997
10586933	neural precursor cell expressed, developmentally down-regulated 4	Nedd4	17999
10571922	NIMA (never in mitosis gene a)-related expressed kinase 1	Nek1	18004
10358259	NIMA (never in mitosis gene a)-related expressed kinase 7	Nek7	59125
10502830	nexilin	Nexn	68810
10574962	nuclear factor of activated T-cells, cytoplasmic, calcineurin-dependent 3	Nfatc3	18021
10514049	nuclear factor I/B	Nfib	18028
10371307	nuclear transcription factor-Y beta	Nfyb	18045
10412830	N-glycanase 1	Ngly1	59007
10563838	non imprinted in Prader-Willi/Angelman syndrome 2 homolog (human)	Nipa2	93790
10427538	Nipped-B homolog (Drosophila)	Nipbl	71175
10505000	nipsnap homolog 3A (C. elegans)	Nipsnap3a	66536
10599232	NFKB activating protein	Nkap	67050
10492598	NMD3 homolog (S. cerevisiae)	Nmd3	97112
10482517	N-myc (and STAT) interactor	Nmi	64685
10468929	N-myristoyltransferase 2	Nmt2	18108
10467344	nucleolar complex associated 3 homolog (S. cerevisiae)	Noc3l	57753
10392328	nucleolar protein 11	Nol11	68979
10404827	nucleolar protein 7	Nol7	70078
10405074	nucleolar protein 8	Nol8	70930
10520405	nucleolar protein with MIF4G domain 1	Nom1	433864
10529425	NOP14 nucleolar protein homolog (yeast)	Nop14	75416
10346634	NOP58 ribonucleoprotein homolog (yeast)	Nop58	55989
10554752	NADPH oxidase 4	Nox4	50490
10585358	nuclear protein in the AT region	Npat	244879
10358879	N-acetylneuraminate pyruvate lyase	Npl	74091
10385043	nucleophosmin 1	Npm1	18148
10583340	nucleophosmin 1	Npm1	18148
10362593	nucleophosmin 1 /// predicted gene 6477 /// predicted gene 9118	Npm1 /// Gm6477 /// Gm9118	18148 /// 624165 /// 668347
10363178	nucleophosmin 1 /// predicted gene 6477 /// predicted gene 9118	Npm1 /// Gm6477 /// Gm9118	18148 /// 624165 /// 668347
10427796	natriuretic peptide receptor 3	Npr3	18162
10585842	neuroplastin	Nptn	20320
10564527	nuclear receptor subfamily 2, group F, member 2	Nr2f2	11819
10458569	nuclear receptor subfamily 3, group C, member 1	Nr3c1	14815
10506893	nardilysin, N-arginine dibasic convertase, NRD convertase 1	Nrd1	230598
10408689	neuritin 1	Nrn1	68404
10606436	nucleosome binding protein 1	Nsbp1	50887
10424363	non-SMC element 2 homolog (MMS21, S. cerevisiae)	Nsmce2	68501
10368654	5'-nucleotidase domain containing 1 /// collagen, type X, alpha 1	Nt5dc1 /// Col10a1	319638 /// 12813
10548038	neurotrophin 3	Ntf3	18205
10520250	negative regulator of ubiquitin-like proteins 1	Nub1	53312
10556583	nucleobindin 2	Nucb2	53322
10349733	nuclear casein kinase and cyclin-dependent kinase substrate 1	Nucks1	98415
10428412	NudC domain containing 1	Nudcd1	67429
10375234	NudC domain containing 2	Nudcd2	52653
10359890	NUF2, NDC80 kinetochore complex component, homolog (S. cerevisiae)	Nuf2	66977
10416510	nuclear fragile X mental retardation protein interacting protein 1	Nufip1	27275
10378902	nuclear fragile X mental retardation protein interacting protein 2	Nufip2	68564
10387992	nucleoporin 88	Nup88	19069
10363137	nuclear undecaprenyl pyrophosphate synthase 1 homolog (S. cerevisiae)	Nus1	52014
10360695	nuclear VCP-like	Nvl	67459
10602166	nuclear transport factor 2-like export factor 2	Nxt2	237082
10607806	oral-facial-digital syndrome 1 gene homolog (human)	Ofd1	237222
10405063	osteoglycin	Ogn	18295
10483648	Obg-like ATPase 1	Ola1	67059
10473491	olfactory receptor 1033	Olfr1033	258571
10386189	olfactory receptor 330	Olfr330	258879
10405058	osteomodulin	Omd	27047
10434888	optic atrophy 1 homolog (human)	Opa1	74143
10354845	origin recognition complex, subunit 2-like (S. cerevisiae)	Orc2l	18393
10511952	origin recognition complex, subunit 3-like (S. cerevisiae)	Orc3l	50793
10482467	origin recognition complex, subunit 4-like (S. cerevisiae)	Orc4l	26428
10436727	open reading frame 63	ORF63	224419
10366310	oxysterol binding protein-like 8	Osbpl8	237542
10515051	oxysterol binding protein-like 9	Osbpl9	100273
10511694	oxidative stress induced growth inhibitor family member 2	Osgin2	209212
10427471	oncostatin M receptor	Osmr	18414
10394534	odd-skipped related 1 (Drosophila)	Osr1	23967
10476628	otoraplin	Otor	57329
10510215	predicted gene, OTTMUSG00000010657	OTTMUSG00000010657	666532
10511661	OTU domain containing 6B	Otud6b	72201
10422608	3-oxoacid CoA transferase 1	Oxct1	67041
10597627	oxidative-stress responsive 1	Oxsr1	108737
10428192	poly(A) binding protein, cytoplasmic 1	Pabpc1	18458
10388337	platelet-activating factor acetylhydrolase, isoform 1b, subunit 1	Pafah1b1	18472
10522668	phosphoribosylaminoimidazole carboxylase, phosphoribosylaminoribosylaminoimidazole, succinocarboxamide synthetase	Paics	67054
10407358	polyadenylate binding protein-interacting protein 1	Paip1	218693
10454831	polyadenylate-binding protein-interacting protein 2	Paip2	67869
10375216	pantothenate kinase 3	Pank3	211347
10411119	PAP associated domain containing 4	Papd4	100715
10521966	PAP associated domain containing 4	Papd4	100715
10398147	poly (A) polymerase alpha	Papola	18789
10384737	poly(A) polymerase gamma	Papolg	216578
10351347	pappalysin 2 /// cellular repressor of E1A-stimulated genes 1	Pappa2 /// Creg1	23850 /// 433375
10413853	poly (ADP-ribose) glycohydrolase	Parg	26430
10439249	poly (ADP-ribose) polymerase family, member 14	Parp14	547253
10414497	poly (ADP-ribose) polymerase family, member 2	Parp2	11546
10366266	PRKC, apoptosis, WT1, regulator	Pawr	114774
10413670	polybromo 1	Pbrm1	66923
10413695	polybromo 1	Pbrm1	66923
10413697	polybromo 1	Pbrm1	66923
10455112	protocadherin beta 17	Pcdhb17	93888
10455118	protocadherin beta 18	Pcdhb18	93889
10455054	protocadherin beta 3	Pcdhb3	93874
10455071	protocadherin beta 7	Pcdhb7	93878
10565547	cleavage and polyadenylation factor subunit homolog (S. cerevisiae)	Pcf11	74737
10462683	polycomb group ring finger 5	Pcgf5	76073
10468275	polycomb group ring finger 6	Pcgf6	71041
10571474	pericentriolar material 1	Pcm1	18536
10344707	protein-L-isoaspartate (D-aspartate) O-methyltransferase domain containing 1	Pcmtd1	319263
10461391	proliferating cell nuclear antigen	Pcna	18538
10487930	proliferating cell nuclear antigen	Pcna	18538
10439980	PEST proteolytic signal containing nuclear protein	Pcnp	76302
10535629	PDGFA associated protein 1	Pdap1	231887
10489041	programmed cell death 10	Pdcd10	56426
10498771	programmed cell death 10	Pdcd10	56426
10463997	programmed cell death 4	Pdcd4	18569
10360983	programmed cell death 5	Pdcd5	56330
10482139	phosducin-like	Pdcl	67466
10345666	phosducin-like 3	Pdcl3	68833
10583021	platelet-derived growth factor, D polypeptide	Pdgfd	71785
10571467	platelet-derived growth factor receptor-like	Pdgfrl	68797
10475335	protein disulfide isomerase associated 3	Pdia3	14827
10448424	3-phosphoinositide dependent protein kinase-1	Pdpk1	18607
10530225	PDS5, regulator of cohesion maintenance, homolog A (S. cerevisiae)	Pds5a	71521
10527832	PDS5, regulator of cohesion maintenance, homolog B (S. cerevisiae)	Pds5b	100710
10362359	phosphatidylethanolamine binding protein 1	Pebp1	23980
10384015	phosphoglycerate mutase 2	Pgam2	56012
10354647	post-GPI attachment to proteins 1	Pgap1	241062
10354649	post-GPI attachment to proteins 1	Pgap1	241062
10599200	progesterone receptor membrane component 1	Pgrmc1	53328
10497646	polyhomeotic-like 3 (Drosophila)	Phc3	241915
10607499	phosphate regulating gene with homologies to endopeptidases on the X chromosome (hypophosphatemia, vitamin D resistant rickets)	Phex	18675
10420483	PHD finger protein 11	Phf11	219131
10536407	PHD finger protein 14	Phf14	75725
10477815	PHD finger protein 20	Phf20	228829
10550169	PHD finger protein 20	Phf20	228829
10424485	PHD finger protein 20-like 1	Phf20l1	239510
10353689	PHD finger protein 3	Phf3	213109
10599612	PHD finger protein 6	Phf6	70998
10500529	3-phosphoglycerate dehydrogenase	Phgdh	236539
10573637	phosphorylase kinase beta	Phkb	102093
10439710	pleckstrin homology-like domain, family B, member 2	Phldb2	208177
10472589	phosphatase, orphan 2	Phospho2	73373
10344981	peptidase inhibitor 15	Pi15	94227
10521832	phosphatidylinositol 4-kinase type 2 beta	Pi4k2b	67073
10594322	protein inhibitor of activated STAT 1	Pias1	56469
10416753	progesterone immunomodulatory binding factor 1	Pibf1	52023
10554839	phosphatidylinositol binding clathrin assembly protein	Picalm	233489
10401166	phosphatidylinositol glycan anchor biosynthesis, class H /// RIKEN cDNA 9230116L04 gene /// pleckstrin homology domain containing, family H (with MyTH4 domain) member 1	Pigh /// 9230116L04Rik /// Plekhh1	110417 /// 321017 /// 211945
10496956	phosphatidylinositol glycan anchor biosynthesis, class K	Pigk	329777
10567173	phosphatidylinositol 3-kinase, C2 domain containing, alpha polypeptide	Pik3c2a	18704
10491331	phosphatidylinositol 3-kinase, catalytic, alpha polypeptide	Pik3ca	18706
10595924	phosphatidylinositol 3-kinase, catalytic, beta polypeptide	Pik3cb	74769
10399924	phosphoinositide-3-kinase, catalytic, gamma polypeptide	Pik3cg	30955
10411782	phosphatidylinositol 3-kinase, regulatory subunit, polypeptide 1 (p85 alpha)	Pik3r1	18708
10507273	phosphatidylinositol 3 kinase, regulatory subunit, polypeptide 3 (p55)	Pik3r3	18710
10480347	phosphatidylinositol-5-phosphate 4-kinase, type II, alpha	Pip4k2a	18718
10378668	phosphatidylinositol transfer protein, alpha	Pitpna	18738
10524314	phosphatidylinositol transfer protein, beta	Pitpnb	56305
10447490	praja 2, RING-H2 motif containing	Pja2	224938
10490794	protein kinase inhibitor, alpha	Pkia	18767
10502484	protein kinase N2	Pkn2	109333
10358434	phospholipase A2, group IVA (cytosolic, calcium-dependent)	Pla2g4a	18783
10445293	phospholipase A2, group VII (platelet-activating factor acetylhydrolase, plasma)	Pla2g7	27226
10514405	phospholipase A2, activating protein	Plaa	18786
10476443	phospholipase C, beta 4	Plcb4	18798
10384458	pleckstrin	Plek	56193
10374406	pleckstrin /// cannabinoid receptor interacting protein 1	Plek /// Cnrip1	56193 /// 380686
10558134	pleckstrin homology domain containing, family A (phosphoinositide binding specific) member 1	Plekha1	101476
10407126	polo-like kinase 2 (Drosophila)	Plk2	20620
10587829	procollagen lysine, 2-oxoglutarate 5-dioxygenase 2	Plod2	26432
10605437	plastin 3 (T-isoform)	Pls3	102866
10477475	palate, lung, and nasal epithelium associated	Plunc	18843
10372028	plexin C1	Plxnc1	54712
10395910	pinin	Pnn	18949
10384474	partner of NOB1 homolog (S. cerevisiae)	Pno1	66249
10395538	patatin-like phospholipase domain containing 8	Pnpla8	67452
10374793	polyribonucleotide nucleotidyltransferase 1	Pnpt1	71701
10517421	proline-rich nuclear receptor coactivator 2	Pnrc2	52830
10605674	polymerase (DNA directed), alpha 1	Pola1	18968
10551841	polymerase (RNA) II (DNA directed) polypeptide I	Polr2i	69920
10476691	polymerase (RNA) III (DNA directed) polypeptide F	Polr3f	70408
10410877	polymerase (RNA) III (DNA directed) polypeptide G	Polr3g	67486
10479736	polymerase (RNA) III (DNA directed) polypeptide K	Polr3k	67005
10607602	protein phosphatase with EF hand calcium-binding domain 1	Ppef1	237178
10492671	peptidylprolyl isomerase D (cyclophilin D)	Ppid	67738
10472570	peptidyl-prolyl isomerase G (cyclophilin G)	Ppig	228005
10361682	peptidylprolyl isomerase (cyclophilin)-like 4	Ppil4	67418
10520952	protein phosphatase 1, catalytic subunit, beta isoform	Ppp1cb	19046
10366238	protein phosphatase 1, regulatory (inhibitor) subunit 12A	Ppp1r12a	17931
10467003	protein phosphatase 1, regulatory (inhibitor) subunit 2 /// protein phosphatase 1, regulatory (inhibitor) subunit 2 pseudogene	Ppp1r2 /// Gm5972	66849 /// 546723
10594636	protein phosphatase 1, regulatory (inhibitor) subunit 2 /// protein phosphatase 1, regulatory (inhibitor) subunit 2 pseudogene	Ppp1r2 /// Gm5972	66849 /// 546723
10348775	protein phosphatase 1, regulatory (inhibitor) subunit 7	Ppp1r7	66385
10375926	protein phosphatase 2 (formerly 2A), catalytic subunit, alpha isoform	Ppp2ca	19052
10421012	protein phosphatase 2 (formerly 2A), regulatory subunit B (PR 52), alpha isoform	Ppp2r2a	71978
10400395	protein phosphatase 2, regulatory subunit B'', gamma	Ppp2r3c	59032
10401007	protein phosphatase 2, regulatory subunit B (B56), epsilon isoform	Ppp2r5e	26932
10417895	protein phosphatase 3, catalytic subunit, beta isoform	Ppp3cb	19056
10374415	protein phosphatase 3, regulatory subunit B, alpha isoform (calcineurin B, type I)	Ppp3r1	19058
10540283	protein phosphatase 4, regulatory subunit 2	Ppp4r2	232314
10482323	protein phosphatase 6, catalytic subunit	Ppp6c	67857
10411915	peptidylprolyl isomerase domain and WD repeat containing 1	Ppwd1	238831
10487945	preimplantation protein 4	Prei4	74182
10382284	protein kinase, cAMP dependent regulatory, type I, alpha	Prkar1a	19084
10589087	protein kinase, cAMP dependent regulatory, type II alpha	Prkar2a	19087
10453026	protein kinase D3	Prkd3	75292
10433797	protein kinase, DNA activated, catalytic polypeptide	Prkdc	19090
10467013	protein kinase, cGMP-dependent, type I	Prkg1	19091
10436456	protein S (alpha)	Pros1	19128
10479794	PRP18 pre-mRNA processing factor 18 homolog (yeast)	Prpf18	67229
10501447	PRP38 pre-mRNA processing factor 38 (yeast) domain containing B	Prpf38b	66921
10396008	PRP39 pre-mRNA processing factor 39 homolog (yeast)	Prpf39	328110
10400581	PRP39 pre-mRNA processing factor 39 homolog (yeast) /// FK506 binding protein 3	Prpf39 /// Fkbp3	328110 /// 30795
10482731	PRP40 pre-mRNA processing factor 40 homolog A (yeast)	Prpf40a	56194
10404538	PRP4 pre-mRNA processing factor 4 homolog B (yeast)	Prpf4b	19134
10607877	phosphoribosyl pyrophosphate synthetase 2	Prps2	110639
10359624	paired related homeobox 1	Prrx1	18933
10461878	prune homolog 2 (Drosophila)	Prune2	353211
10578986	pleckstrin and Sec7 domain containing 3	Psd3	234353
10514158	PC4 and SFRS1 interacting protein 1	Psip1	101739
10396193	proteasome (prosome, macropain) subunit, alpha type 3	Psma3	19167
10543783	proteasome (prosome, macropain) subunit, alpha type 3	Psma3	19167
10585474	proteasome (prosome, macropain) subunit, alpha type 4	Psma4	26441
10581378	proteasome (prosome, macropain) subunit, beta type 10	Psmb10	19171
10439878	protease (prosome, macropain) 26S subunit, ATPase 1	Psmc1	19179
10414288	proteasome (prosome, macropain) 26S subunit, ATPase, 6	Psmc6	67089
10348004	proteasome (prosome, macropain) 26S subunit, non-ATPase, 1	Psmd1	70247
10382139	proteasome (prosome, macropain) 26S subunit, non-ATPase, 12	Psmd12	66997
10472300	proteasome (prosome, macropain) 26S subunit, non-ATPase, 14	Psmd14	59029
10581560	proteasome (prosome, macropain) 26S subunit, non-ATPase, 7	Psmd7	17463
10374934	proteasome (prosome, macropain) activator subunit 4	Psme4	103554
10501778	polypyrimidine tract binding protein 2	Ptbp2	56195
10545346	pentatricopeptide repeat domain 3	Ptcd3	69956
10462521	phosphatase and tensin homolog	Pten	19211
10469312	phosphotriesterase related /// C1q-like 3	Pter /// C1ql3	19212 /// 227580
10497079	prostaglandin E receptor 3 (subtype EP3)	Ptger3	19218
10367100	prostaglandin E synthase 3 (cytosolic)	Ptges3	56351
10539649	prostaglandin E synthase 3 (cytosolic)	Ptges3	56351
10417601	prothymosin alpha	Ptma	19231
10495873	prothymosin alpha	Ptma	19231
10353707	protein tyrosine phosphatase 4a1 /// protein tyrosine phosphatase 4a1-like /// protein tyrosine phosphatase 4a1-like /// protein tyrosine phosphatase 4a1 pseudogene	Ptp4a1 /// Gm13363 /// Gm8783 /// Gm15801	19243 /// 433406 /// 667723 /// 627166
10467489	protein tyrosine phosphatase 4a1 /// protein tyrosine phosphatase 4a1-like /// protein tyrosine phosphatase 4a1-like /// protein tyrosine phosphatase 4a1 pseudogene	Ptp4a1 /// Gm13363 /// Gm8783 /// Gm15801	19243 /// 433406 /// 667723 /// 627166
10469575	protein tyrosine phosphatase 4a1 /// protein tyrosine phosphatase 4a1-like /// protein tyrosine phosphatase 4a1-like /// protein tyrosine phosphatase 4a1 pseudogene	Ptp4a1 /// Gm13363 /// Gm8783 /// Gm15801	19243 /// 433406 /// 667723 /// 627166
10548563	protein tyrosine phosphatase 4a1 /// protein tyrosine phosphatase 4a1-like /// protein tyrosine phosphatase 4a1-like /// protein tyrosine phosphatase 4a1 pseudogene	Ptp4a1 /// Gm13363 /// Gm8783 /// Gm15801	19243 /// 433406 /// 667723 /// 627166
10508479	protein tyrosine phosphatase 4a2	Ptp4a2	19244
10514275	protein tyrosine phosphatase-like A domain containing 2	Ptplad2	66775
10528268	protein tyrosine phosphatase, non-receptor type 12	Ptpn12	19248
10459590	protein tyrosine phosphatase, non-receptor type 2	Ptpn2	19255
10358224	protein tyrosine phosphatase, receptor type, C	Ptprc	19264
10536667	protein tyrosine phosphatase, receptor type Z, polypeptide 1	Ptprz1	19283
10492448	pentraxin related gene	Ptx3	19288
10384150	purine rich element binding protein B	Purb	19291
10571241	purine-rich element binding protein G	Purg	75029
10374706	pseudouridylate synthase 10	Pus10	74467
10528507	pseudouridylate synthase 7 homolog (S. cerevisiae)	Pus7	78697
10431792	pseudouridylate synthase 7 homolog (S. cerevisiae)-like	Pus7l	78895
10351873	pyrin and HIN domain family, member 1	Pyhin1	236312
10542636	pyridine nucleotide-disulphide oxidoreductase domain 1	Pyroxd1	232491
10447708	quaking	Qk	19317
10447056	glutaminyl-peptide cyclotransferase (glutaminyl cyclase)	Qpct	70536
10485607	glutamine and serine rich 1	Qser1	99003
10485622	glutamine and serine rich 1	Qser1	99003
10374466	RAB1, member RAS oncogene family	Rab1	19324
10399214	RAB10, member RAS oncogene family	Rab10	19325
10468795	RAB11 family interacting protein 2 (class I)	Rab11fip2	74998
10452556	RAB12, member RAS oncogene family	Rab12	19328
10453705	RAB18, member RAS oncogene family	Rab18	19330
10372478	RAB21, member RAS oncogene family	Rab21	216344
10345230	RAB23, member RAS oncogene family	Rab23	19335
10529741	RAB28, member RAS oncogene family	Rab28	100972
10503150	RAB2A, member RAS oncogene family	Rab2a	59021
10529873	RAB2A, member RAS oncogene family	Rab2a	59021
10419676	RAB2B, member RAS oncogene family	Rab2b	76338
10445898	RAB5A, member RAS oncogene family	Rab5a	271457
10594645	RAB8B, member RAS oncogene family	Rab8b	235442
10607832	RAB9, member RAS oncogene family	Rab9	56382
10377987	rabaptin, RAB GTPase binding effector protein 1	Rabep1	54189
10471784	RAB GTPase activating protein 1	Rabgap1	227800
10411690	RAD17 homolog (S. pombe)	Rad17	19356
10428561	RAD21 homolog (S. pombe)	Rad21	19357
10385842	RAD50 homolog (S. cerevisiae)	Rad50	19360
10596543	RAD54 like 2 (S. cerevisiae)	Rad54l2	81000
10407907	v-ral simian leukemia viral oncogene homolog A (ras related)	Rala	56044
10452496	ralA binding protein 1	Ralbp1	19765
10374197	receptor (calcitonin) activity modifying protein 3	Ramp3	56089
10363281	RAN binding protein 2	Ranbp2	19386
10500976	RAS-related protein-1a	Rap1a	109905
10563641	RAS-related protein-1a /// predicted gene 9392	Rap1a /// Gm9392	109905 /// 668838
10372716	RAS related protein 1b	Rap1b	215449
10502419	RAP1, GTP-GDP dissociation stimulator 1	Rap1gds1	229877
10492335	RAP2B, member of RAS oncogene family	Rap2b	74012
10604523	RAP2C, member of RAS oncogene family	Rap2c	72065
10376163	Rap guanine nucleotide exchange factor (GEF) 6	Rapgef6	192786
10385159	arginyl-tRNA synthetase	Rars	104458
10503926	arginyl-tRNA synthetase 2, mitochondrial	Rars2	109093
10410892	RAS p21 protein activator 1	Rasa1	218397
10595805	RAS p21 protein activator 2	Rasa2	114713
10366153	Ras association (RalGDS/AF-6) domain family (N-terminal) member 9	Rassf9	237504
10421526	retinoblastoma 1	Rb1	19645
10344658	RB1-inducible coiled-coil 1	Rb1cc1	12421
10557206	retinoblastoma binding protein 6	Rbbp6	19647
10453867	retinoblastoma binding protein 8	Rbbp8	225182
10397068	RNA binding motif protein 25	Rbm25	67039
10397081	RNA binding motif protein 25	Rbm25	67039
10397083	RNA binding motif protein 25	Rbm25	67039
10397085	RNA binding motif protein 25	Rbm25	67039
10422194	RNA binding motif protein 26	Rbm26	74213
10455312	RNA binding motif protein 27	Rbm27	225432
10603469	RNA binding motif protein 3	Rbm3	19652
10582823	RNA binding motif protein 34	Rbm34	52202
10489018	RNA binding motif protein 39	Rbm39	170791
10593213	RNA binding motif protein 7	Rbm7	67010
10483023	RNA binding motif, single stranded interacting protein 1	Rbms1	56878
10521913	recombination signal binding protein for immunoglobulin kappa J region	Rbpj	19664
10351013	RING CCCH (C3H) domains 1	Rc3h1	381305
10585545	reticulocalbin 2	Rcn2	26611
10394555	retinol dehydrogenase 14 (all-trans and 9-cis)	Rdh14	105014
10585301	radixin /// RIKEN cDNA 9830163H01 gene	Rdx /// 9830163H01Rik	19684 /// 414109
10549057	RecQ protein-like /// pyridine nucleotide-disulphide oxidoreductase domain 1	Recql /// Pyroxd1	19691 /// 232491
10436095	resistin like alpha	Retnla	57262
10530163	replication factor C (activator 1) 1	Rfc1	19687
10410709	Rieske (Fe-S) domain containing	Rfesd	218341
10350923	ring finger and WD repeat domain 2	Rfwd2	26374
10606160	ring finger and WD repeat domain 2	Rfwd2	26374
10439985	RNA (guanine-9-) methyltransferase domain containing 1	Rg9mtd1	52575
10358421	regulator of G-protein signaling 18	Rgs18	64214
10351463	regulator of G-protein signaling 5	Rgs5	19737
10528691	Ras homolog enriched in brain	Rheb	19744
10447341	ras homolog gene family, member Q	Rhoq	104215
10379410	ras homolog gene family, member T1	Rhot1	59040
10604119	reproductive homeobox 4A /// reproductive homeobox 4B /// reproductive homeobox 4D /// reproductive homeobox 4E /// reproductive homeobox 4F /// reproductive homeobox 4G /// reproductive homeobox 4C	Rhox4a /// Rhox4b /// Rhox4d /// Rhox4e /// Rhox4f /// Rhox4g /// Rhox4c	664609 /// 57737 /// 664610 /// 194856 /// 636177 /// 664608 /// 434759
10472058	Rap1 interacting factor 1 homolog (yeast)	Rif1	51869
10404630	RIO kinase 1 (yeast)	Riok1	71340
10453900	RIO kinase 3 (yeast)	Riok3	66878
10606195	ring finger protein, LIM domain interacting	Rlim	19820
10350742	ribonuclease L (2', 5'-oligoisoadenylate synthetase-dependent)	Rnasel	24014
10494527	ring finger protein 115	Rnf115	67845
10602009	ring finger protein 128	Rnf128	66889
10492180	ring finger protein 13	Rnf13	24017
10566926	ring finger protein 141	Rnf141	67150
10354191	ring finger protein 149	Rnf149	67702
10440543	ring finger protein 160	Rnf160	78913
10440560	ring finger protein 160	Rnf160	78913
10440562	ring finger protein 160	Rnf160	78913
10440564	ring finger protein 160	Rnf160	78913
10440566	ring finger protein 160	Rnf160	78913
10440568	ring finger protein 160	Rnf160	78913
10440570	ring finger protein 160	Rnf160	78913
10440572	ring finger protein 160	Rnf160	78913
10440574	ring finger protein 160	Rnf160	78913
10440576	ring finger protein 160	Rnf160	78913
10435024	ring finger protein 168	Rnf168	70238
10571093	ring finger protein 170	Rnf170	77733
10428157	ring finger protein 19A	Rnf19a	30945
10358698	ring finger protein 2	Rnf2	19821
10422185	ring finger protein 219	Rnf219	72486
10535725	ring finger protein (C3H2C3 type) 6	Rnf6	74132
10379957	ring finger protein, transmembrane 1	Rnft1	76892
10503882	RNA guanylyltransferase and 5'-phosphatase	Rngtt	24018
10456501	RNA (guanine-7-) methyltransferase	Rnmt	67897
10501567	RNA-binding region (RNP1, RRM) containing 3	Rnpc3	67225
10499128	U73A small nuclear RNA	Rnu73a	19870
10457429	Rho-associated coiled-coil containing protein kinase 1	Rock1	19877
10394699	Rho-associated coiled-coil containing protein kinase 2	Rock2	19878
10477808	reactive oxygen species modulator 1	Romo1	67067
10598839	retinitis pigmentosa 2 homolog (human)	Rp2h	19889
10523880	RNA polymerase II associated protein 2	Rpap2	231571
10431948	RNA polymerase II associated protein 3	Rpap3	71919
10347106	ribulose-5-phosphate-3-epimerase	Rpe	66646
10586157	ribosomal protein L4	Rpl4	67891
10462670	ribonuclease P/MRP 30 subunit (human)	Rpp30	54364
10479749	ribonuclease P/MRP 38 subunit (human)	Rpp38	227522
10408666	ribonuclease P 40 subunit (human)	Rpp40	208366
10457862	regulation of nuclear pre-mRNA domain containing 1A	Rprd1a	225283
10602772	ribosomal protein S6 kinase polypeptide 3	Rps6ka3	110651
10389484	ribosomal protein S6 kinase, polypeptide 1	Rps6kb1	72508
10507894	Ras-related GTP binding C	Rragc	54170
10488195	ribosome binding protein 1	Rrbp1	81910
10428232	ribonucleotide reductase M2 B (TP53 inducible)	Rrm2b	382985
10360934	ribosomal RNA processing 15 homolog (S. cerevisiae)	Rrp15	67223
10344723	RRS1 ribosome biogenesis regulator homolog (S. cerevisiae)	Rrs1	59014
10495001	rosbin, round spermatid basic protein 1	Rsbn1	229675
10528257	round spermatid basic protein 1-like	Rsbn1l	242860
10555089	remodeling and spacing factor 1	Rsf1	233532
10405918	regulator of sex limited protein 1	Rsl1	380855
10437737	ribosomal L1 domain containing 1	Rsl1d1	66409
10574184	ring finger and SPRY domain containing 1	Rspry1	67610
10492456	arginine/serine-rich coiled-coil 1	Rsrc1	66880
10533703	arginine/serine-rich coiled-coil 2	Rsrc2	208606
10480145	Ras suppressor protein 1	Rsu1	20163
10475000	Rtf1, Paf1/RNA polymerase II complex component, homolog (S. cerevisiae)	Rtf1	76246
10374908	reticulon 4	Rtn4	68585
10434778	receptor transporter protein 4	Rtp4	67775
10590597	SAC1 (suppressor of actin mutations 1, homolog)-like (S. cerevisiae)	Sacm1l	83493
10542911	sterile alpha motif domain containing 9-like	Samd9l	209086
10464479	SAPS domain family, member 3	Saps3	52036
10367422	SAP domain containing ribonucleoprotein	Sarnp	66118
10462100	SAP domain containing ribonucleoprotein	Sarnp	66118
10534142	Shwachman-Bodian-Diamond syndrome homolog (human)	Sbds	66711
10533812	sno, strawberry notch homolog 1 (Drosophila)	Sbno1	243272
10578916	sterol-C4-methyl oxidase-like	Sc4mol	66234
10593799	S phase cyclin A-associated protein in the ER	Scaper	244891
10352178	saccharopine dehydrogenase (putative) /// similar to Saccharopine dehydrogenase (putative)	Sccpdh /// LOC100044896	109232 /// 100044896
10463355	stearoyl-Coenzyme A desaturase 2	Scd2	20250
10395628	Sec1 family domain containing 1	Scfd1	76983
10497971	sodium channel and clathrin linker 1	Sclt1	67161
10472376	sodium channel, voltage-gated, type II, alpha 1	Scn2a1	110876
10472378	sodium channel, voltage-gated, type II, alpha 1	Scn2a1	110876
10472398	sodium channel, voltage-gated, type II, alpha 1	Scn2a1	110876
10472400	sodium channel, voltage-gated, type II, alpha 1	Scn2a1	110876
10472402	sodium channel, voltage-gated, type II, alpha 1	Scn2a1	110876
10450904	short coiled-coil protein	Scoc	56367
10472933	secernin 3	Scrn3	74616
10371811	SCY1-like 2 (S. cerevisiae)	Scyl2	213326
10531383	SDA1 domain containing 1	Sdad1	231452
10423548	syndecan 2	Sdc2	15529
10503134	syndecan binding protein	Sdcbp	53378
10400668	serologically defined colon cancer antigen 1	Sdccag1	66244
10411927	serologically defined colon cancer antigen 10	Sdccag10	67285
10491261	SEC62 homolog (S. cerevisiae)	Sec62	69276
10362837	SEC63-like (S. cerevisiae)	Sec63	140740
10487154	SECIS binding protein 2-like	Secisbp2l	70354
10456423	SEH1-like (S. cerevisiae	Seh1l	72124
10351182	selectin, endothelial cell	Sele	20339
10519717	sema domain, immunoglobulin domain (Ig), short basic domain, secreted, (semaphorin) 3A	Sema3a	20346
10519693	sema domain, immunoglobulin domain (Ig), short basic domain, secreted, (semaphorin) 3D	Sema3d	108151
10434645	SUMO/sentrin specific peptidase 2	Senp2	75826
10439021	SUMO/sentrin specific peptidase 5	Senp5	320213
10587419	SUMO/sentrin specific peptidase 6	Senp6	215351
10422598	selenoprotein P, plasma, 1	Sepp1	20363
10530045	Sep (O-phosphoserine) tRNA:Sec (selenocysteine) tRNA synthase	Sepsecs	211006
10348817	septin 2	Sept2	18000
10583905	septin 7	Sept7	235072
10538857	serpine1 mRNA binding protein 1	Serbp1	66870
10369210	serine incorporator 1	Serinc1	56442
10498319	stress-associated endoplasmic reticulum protein 1	Serp1	28146
10408600	serine (or cysteine) peptidase inhibitor, clade B, member 6a	Serpinb6a	20719
10404422	serine (or cysteine) peptidase inhibitor, clade B, member 6b	Serpinb6b	20708
10404429	serine (or cysteine) peptidase inhibitor, clade B, member 9	Serpinb9	20723
10492628	serine (or cysteine) peptidase inhibitor, clade I, member 1	Serpini1	20713
10589587	SET domain containing 2	Setd2	235626
10582699	SET domain containing 6 /// RIKEN cDNA 2810004N23 gene /// glyceronephosphate O-acyltransferase	Setd6 /// 2810004N23Rik /// Gnpat	66083 /// 66523 /// 14712
10420503	SET domain, bifurcated 2	Setdb2	239122
10470665	senataxin	Setx	269254
10354704	splicing factor 3b, subunit 1	Sf3b1	81898
10508217	splicing factor proline/glutamine rich (polypyrimidine tract binding protein associated)	Sfpq	71514
10380210	splicing factor, arginine/serine-rich 1 (ASF/SF2)	Sfrs1	110809
10407012	SFRS12-interacting protein 1	Sfrs12ip1	67288
10503570	splicing factor, arginine/serine-rich 18	Sfrs18	66625
10431856	splicing factor, arginine/serine-rich 2, interacting protein	Sfrs2ip	72193
10443459	splicing factor, arginine/serine-rich 3 (SRp20)	Sfrs3	20383
10508490	splicing factor, arginine/serine-rich 5 (SRp40, HRS) /// predicted gene 12966	Sfrs5 /// Gm12966	20384 /// 622469
10457959	SFT2 domain containing 3	Sft2d3	67158
10530633	sarcoglycan, beta (dystrophin-associated glycoprotein)	Sgcb	24051
10344750	serum/glucocorticoid regulated kinase 3	Sgk3	170755
10351477	SH2 domain protein 1B1	Sh2d1b1	26904
10601449	SH3-binding domain glutamic acid-rich protein like	Sh3bgrl	56726
10502537	SH3-domain GRB2-like B1 (endophilin)	Sh3glb1	54673
10602840	SH3-domain kinase binding protein 1	Sh3kbp1	58194
10475625	SHC (Src homology 2 domain containing) family, member 4 /// EP300 interacting inhibitor of differentiation 1	Shc4 /// Eid1	271849 /// 58521
10464015	soc-2 (suppressor of clear) homolog (C. elegans)	Shoc2	56392
10497364	signal-regulatory protein beta 1 /// similar to SIRP beta 1 cell surface protein /// similar to SIRP beta 1 isoform 1 /// similar to SIRP beta 1 isoform 3	Sirpb1 /// LOC100038947 /// LOC641195 /// LOC630976	320832 /// 100038947 /// 641195 /// 630976
10544732	src family associated phosphoprotein 2	Skap2	54353
10491300	SKI-like	Skil	20482
10412177	superkiller viralicidic activity 2-like 2 (S. cerevisiae)	Skiv2l2	72198
10360173	SLAM family member 7	Slamf7	75345
10529299	stem-loop binding protein	Slbp	20492
10461558	solute carrier family 15, member 3	Slc15a3	65221
10595189	solute carrier family 17 (anion/sugar transporter), member 5	Slc17a5	235504
10447773	solute carrier family 22 (organic cation transporter), member 3	Slc22a3	20519
10495405	solute carrier family 25 (mitochondrial carrier, phosphate carrier), member 24	Slc25a24	229731
10428328	solute carrier family 25, member 32	Slc25a32	69906
10479979	solute carrier family 25, member 36	Slc25a36	192287
10519516	solute carrier family 25, member 40	Slc25a40	319653
10595570	solute carrier family 25, member 40	Slc25a40	319653
10475653	solute carrier family 27 (fatty acid transporter), member 2	Slc27a2	26458
10487021	solute carrier family 30 (zinc transporter), member 4	Slc30a4	22785
10522265	solute carrier family 30 (zinc transporter), member 9	Slc30a9	109108
10505270	solute carrier family 31, member 2	Slc31a2	20530
10498485	solute carrier family 33 (acetyl-CoA transporter), member 1	Slc33a1	11416
10511975	solute carrier family 35 (CMP-sialic acid transporter), member 1	Slc35a1	24060
10501690	solute carrier family 35 (UDP-N-acetylglucosamine (UDP-GlcNAc) transporter), member 3	Slc35a3	229782
10431872	solute carrier family 38, member 1	Slc38a1	105727
10396383	solute carrier family 38, member 6	Slc38a6	625098
10582082	solute carrier family 38, member 8	Slc38a8	234788
10354389	solute carrier family 39 (zinc transporter), member 10	Slc39a10	227059
10354374	solute carrier family 40 (iron-regulated transporter), member 1	Slc40a1	53945
10505028	solute carrier family 44, member 1	Slc44a1	100434
10520815	solute carrier family 4 (anion exchanger), member 1, adaptor protein	Slc4a1ap	20534
10412773	solute carrier family 4, sodium bicarbonate cotransporter, member 7	Slc4a7	218756
10453231	solute carrier family 8 (sodium/calcium exchanger), member 1	Slc8a1	20541
10379615	schlafen 5	Slfn5	327978
10389143	schlafen 8	Slfn8	276950
10463803	STE20-like kinase (yeast)	Slk	20874
10418218	sarcolemma associated protein	Slmap	83997
10586816	SAFB-like, transcription modulator	Sltm	66660
10375290	SLU7 splicing factor homolog (S. cerevisiae)	Slu7	193116
10462237	SWI/SNF related, matrix associated, actin dependent regulator of chromatin, subfamily a, member 2	Smarca2	67155
10579915	SWI/SNF related, matrix associated, actin dependent regulator of chromatin, subfamily a, member 5	Smarca5	93762
10510142	SWI/SNF related, matrix associated, actin dependent regulator of chromatin, subfamily a, member 5 /// vomeronasal 2, receptor, pseudogene 14 /// predicted gene 13034	Smarca5 /// Vmn2r-ps14 /// Gm13034	93762 /// 545700 /// 627585
10518361	SWI/SNF related, matrix associated, actin dependent regulator of chromatin, subfamily a, member 5 /// vomeronasal 2, receptor, pseudogene 14 /// predicted gene 13034	Smarca5 /// Vmn2r-ps14 /// Gm13034	93762 /// 545700 /// 627585
10538755	SWI/SNF-related, matrix-associated actin-dependent regulator of chromatin, subfamily a, containing DEAD/H box 1	Smarcad1	13990
10589466	SWI/SNF related, matrix associated, actin dependent regulator of chromatin, subfamily c, member 1	Smarcc1	20588
10390768	SWI/SNF related, matrix associated, actin dependent regulator of chromatin, subfamily e, member 1	Smarce1	57376
10527528	SWI/SNF related, matrix associated, actin dependent regulator of chromatin, subfamily e, member 1	Smarce1	57376
10578391	SWI/SNF related, matrix associated, actin dependent regulator of chromatin, subfamily e, member 1	Smarce1	57376
10602599	structural maintenance of chromosomes 1A	Smc1a	24061
10463951	structural maintenace of chromosomes 3	Smc3	13006
10492558	structural maintenance of chromosomes 4	Smc4	70099
10466682	structural maintenance of chromosomes 5	Smc5	226026
10394560	structural maintenance of chromosomes 6	Smc6	67241
10452658	SMC hinge domain containing 1	Smchd1	74355
10452701	SMC hinge domain containing 1	Smchd1	74355
10402179	SMEK homolog 1, suppressor of mek1 (Dictyostelium)	Smek1	68734
10374821	SMEK homolog 2, suppressor of mek1 (Dictyostelium)	Smek2	104570
10607524	spermine synthase	Sms	20603
10604844	spermine synthase /// spermine synthase pseudogene	Sms /// Gm8234	20603 /// 666680
10392259	SMAD specific E3 ubiquitin protein ligase 2	Smurf2	66313
10433776	snail homolog 2 (Drosophila)	Snai2	20583
10475199	synaptosomal-associated protein 23	Snap23	20619
10433996	synaptosomal-associated protein 29	Snap29	67474
10396442	small nuclear RNA activating complex, polypeptide 1	Snapc1	75627
10586176	small nuclear RNA activating complex, polypeptide 5	Snapc5	330959
10461156	small nucleolar RNA host gene (non-protein coding) 1	Snhg1	83673
10476620	U2 small nuclear ribonucleoprotein B	Snrpb2	20639
10401805	SNW domain containing 1	Snw1	66354
10395328	sorting nexin 13	Snx13	217463
10595573	sorting nexin 14	Snx14	244962
10455738	sorting nexin 2	Snx2	67804
10499996	sorting nexin family member 27	Snx27	76742
10435226	sorting nexin 4	Snx4	69150
10488237	sorting nexin 5	Snx5	69178
10400336	sorting nexin 6	Snx6	72183
10501762	sorting nexin 7	Snx7	76561
10414350	suppressor of cytokine signaling 4	Socs4	67296
10460118	suppressor of cytokine signaling 6	Socs6	54607
10566668	suppressor of cytokine signaling 6	Socs6	54607
10453141	son of sevenless homolog 1 (Drosophila)	Sos1	20662
10347948	nuclear antigen Sp100	Sp100	20684
10356269	Sp140 nuclear body protein /// RIKEN cDNA A530032D15Rik gene	Sp140 /// A530032D15Rik	434484 /// 381287
10483633	trans-acting transcription factor 3	Sp3	20687
10380341	sperm associated antigen 9	Spag9	70834
10507040	spermatogenesis associated 6	Spata6	67946
10483401	SPC25, NDC80 kinetochore complex component, homolog (S. cerevisiae)	Spc25	66442
10578703	signal peptidase complex subunit 3 homolog (S. cerevisiae)	Spcs3	76687
10492102	spastic paraplegia 20, spartin (Troyer syndrome) homolog (human)	Spg20	229285
10380534	speckle-type POZ protein	Spop	20747
10480445	speckle-type POZ protein-like	Spopl	76857
10523717	secreted phosphoprotein 1	Spp1	20750
10563659	SPT2, Suppressor of Ty, domain containing 1 (S. cerevisiae)	Spty2d1	101685
10454674	signal recognition particle 19	Srp19	66384
10395788	signal recognition particle 54b /// signal recognition particle 54C /// signal recognition particle 54a /// RIKEN cDNA 1700047I17 gene 1	Srp54b /// Srp54c /// Srp54a /// 1700047I17Rik1	665155 /// 100101806 /// 24067 /// 73385
10522676	signal recognition particle 72	Srp72	66661
10528484	serine/arginine-rich protein specific kinase 2	Srpk2	20817
10472605	Sjogren syndrome antigen B	Ssb	20823
10378855	slingshot homolog 2 (Drosophila)	Ssh2	237860
10542740	sarcospan	Sspn	16651
10498519	signal sequence receptor, gamma	Ssr3	67437
10496796	synovial sarcoma, X breakpoint 2 interacting protein	Ssx2ip	99167
10430725	suppression of tumorigenicity 13	St13	70356
10356880	ST8 alpha-N-acetyl-neuraminide alpha-2,8-sialyltransferase 4	St8sia4	20452
10588154	stromal antigen 1	Stag1	20842
10599377	stromal antigen 2	Stag2	20843
10469335	signal transducing adaptor molecule (SH3 domain and ITAM motif) 1	Stam	20844
10354588	serine/threonine kinase 17b (apoptosis-inducing)	Stk17b	98267
10428103	serine/threonine kinase 3 (Ste20, yeast homolog)	Stk3	56274
10578572	storkhead box 2	Stox2	71069
10542445	serine/threonine kinase receptor associated protein	Strap	20901
10482181	spermatid perinuclear RNA binding protein	Strbp	20744
10452918	striatin, calmodulin binding protein	Strn	268980
10400191	striatin, calmodulin binding protein 3	Strn3	94186
10516982	syntaxin 12	Stx12	100226
10362171	syntaxin 7	Stx7	53331
10501420	syntaxin binding protein 3A	Stxbp3a	20912
10465853	syntaxin-binding protein 3B /// syntaxin binding protein 3A	Stxbp3b /// Stxbp3a	619371 /// 20912
10389795	syntaxin binding protein 4	Stxbp4	20913
10599925	serine/threonine/tyrosine interaction protein	Styx	56291
10427807	SUB1 homolog (S. cerevisiae)	Sub1	20024
10416379	succinate-Coenzyme A ligase, ADP-forming, beta subunit	Sucla2	20916
10607497	succinate-Coenzyme A ligase, GDP-forming, beta subunit	Suclg2	20917
10586880	suppressor of hairy wing homolog 4 (Drosophila)	Suhw4	235469
10355017	SMT3 suppressor of mif two 3 homolog 1 (yeast)	Sumo1	22218
10490078	SMT3 suppressor of mif two 3 homolog 1 (yeast)	Sumo1	22218
10520124	SMT3 suppressor of mif two 3 homolog 2 (yeast)	Sumo2	170930
10484351	SMT3 suppressor of mif two 3 homolog 2 (yeast) /// predicted gene 13430 /// predicted gene 13690 /// predicted gene 10241	Sumo2 /// Gm13430 /// Gm13690 /// Gm10241	170930 /// 675440 /// 672381 /// 100043459
10419611	suppressor of Ty 16 homolog (S. cerevisiae)	Supt16h	114741
10460202	suppressor of variegation 4-20 homolog 1 (Drosophila)	Suv420h1	225888
10379346	suppressor of zeste 12 homolog (Drosophila)	Suz12	52615
10556280	SWA-70 protein	Swap70	20947
10607694	synapse associated protein 1	Syap1	67043
10365627	synaptonemal complex protein 3	Sycp3	20962
10595604	synaptotagmin binding, cytoplasmic RNA interacting protein	Syncrip	56403
10395277	synaptophysin-like protein	Sypl	19027
10499431	synaptotagmin XI	Syt11	229521
10500802	synaptotagmin VI /// autophagy-related 4A (yeast)	Syt6 /// Atg4a	54524 /// 666468
10602090	synaptotagmin VI /// autophagy-related 4A (yeast)	Syt6 /// Atg4a	54524 /// 666468
10603573	synaptotagmin-like 5	Sytl5	236643
10601192	TAF1 RNA polymerase II, TATA box binding protein (TBP)-associated factor	Taf1	270627
10375973	TAF13 RNA polymerase II, TATA box binding protein (TBP)-associated factor	Taf13	99730
10379689	TAF15 RNA polymerase II, TATA box binding protein (TBP)-associated factor	Taf15	70439
10394942	TATA box binding protein (Tbp)-associated factor, RNA polymerase I, B	Taf1b	21340
10583297	TATA box binding protein (Tbp)-associated factor, RNA polymerase I, D	Taf1d	75316
10406898	TAF9 RNA polymerase II, TATA box binding protein (TBP)-associated factor	Taf9	108143
10606315	TAF9B RNA polymerase II, TATA box binding protein (TBP)-associated factor	Taf9b	407786
10472289	TRAF family member-associated Nf-kappa B activator	Tank	21353
10388682	TAO kinase 1	Taok1	216965
10388684	TAO kinase 1	Taok1	216965
10427772	threonyl-tRNA synthetase	Tars	110960
10553935	threonyl-tRNA synthetase-like 2 /// TM2 domain containing 3	Tarsl2 /// Tm2d3	272396 /// 68634
10538318	Tax1 (human T-cell leukemia virus type I) binding protein 1	Tax1bp1	52440
10462957	TBC1D12: TBC1 domain family, member 12	Tbc1d12	209478
10372457	TBC1 domain family, member 15	Tbc1d15	66687
10521927	TBC1 domain family, member 19	Tbc1d19	67249
10602020	TBC1 domain family, member 8B	Tbc1d8b	245638
10372853	TANK-binding kinase 1	Tbk1	56480
10426301	transcription elongation factor A (SII) 1	Tcea1	21399
10601878	transcription elongation factor A (SII)-like 1	Tceal1	237052
10606858	transcription elongation factor A (SII)-like 8	Tceal8	66684
10517443	transcription elongation factor B (SIII), polypeptide 3	Tceb3	27224
10455346	transcription elongation regulator 1 (CA150)	Tcerg1	56070
10594879	transcription factor 12	Tcf12	21406
10441797	t-complex protein 1	Tcp1	21454
10448016	t-complex-associated testis expressed 3 /// predicted gene 3448 /// predicted gene 3417 /// predicted gene 3435	Tcte3 /// Gm3448 /// Gm3417 /// Gm3435	21647 /// 100041639 /// 100041586 /// 100041621
10435048	Tctex1 domain containing 2	Tctex1d2	66061
10416709	tudor domain containing 3	Tdrd3	219249
10530536	tec protein tyrosine kinase	Tec	21682
10344939	telomeric repeat binding factor 1	Terf1	21749
10369702	tet oncogene 1	Tet1	52463
10369867	transcription factor A, mitochondrial	Tfam	21780
10360580	transcription factor B2, mitochondrial	Tfb2m	15278
10400165	transcription factor B2, mitochondrial	Tfb2m	15278
10484389	tissue factor pathway inhibitor	Tfpi	21788
10435075	transferrin receptor	Tfrc	22042
10504817	transforming growth factor, beta receptor I	Tgfbr1	21812
10372497	THAP domain containing, apoptosis associated protein 2	Thap2	66816
10453766	THO complex 1	Thoc1	225160
10604248	THO complex 2	Thoc2	331401
10417676	THO complex 7 homolog (Drosophila)	Thoc7	66231
10567407	THUMP domain containing 1	Thumpd1	233802
10540544	THUMP domain containing 3	Thumpd3	14911
10539710	cytotoxic granule-associated RNA binding protein 1	Tia1	21841
10568399	Tia1 cytotoxic granule-associated RNA binding protein-like 1	Tial1	21843
10495967	TRAF-interacting protein with forkhead-associated domain	Tifa	211550
10538684	tigger transposable element derived 2	Tigd2	68140
10371006	translocase of inner mitochondrial membrane 13 homolog (yeast)	Timm13	30055
10586184	timeless interacting protein	Tipin	66131
10564343	tight junction protein 1	Tjp1	21872
10483563	tousled-like kinase 1	Tlk1	228012
10381872	tousled-like kinase 2 (Arabidopsis) /// RIKEN cDNA 1700052K11 gene	Tlk2 /// 1700052K11Rik	24086 /// 73431
10530145	toll-like receptor 1	Tlr1	21897
10601385	toll-like receptor 13	Tlr13	279572
10578493	toll-like receptor 3	Tlr3	142980
10505517	toll-like receptor 4	Tlr4	21898
10607870	toll-like receptor 7	Tlr7	170743
10607868	toll-like receptor 8	Tlr8	170744
10463482	T-cell leukemia, homeobox 1	Tlx1	21908
10467560	transmembrane 9 superfamily member 3	Tm9sf3	107358
10425114	transmembrane emp24 domain trafficking protein 2	Tmed2	56334
10584162	transmembrane emp24 domain trafficking protein 2	Tmed2	56334
10532157	transmembrane emp24 protein transport domain containing 5	Tmed5	73130
10536429	transmembrane protein 106B	Tmem106b	71900
10583145	transmembrane protein 123	Tmem123	71929
10565519	transmembrane protein 126B	Tmem126b	68472
10579799	transmembrane protein 184C	Tmem184c	234463
10573703	transmembrane protein 188	Tmem188	382030
10595288	transmembrane protein 30A	Tmem30a	69981
10505064	transmembrane protein 38B	Tmem38b	52076
10505071	transmembrane protein 38B	Tmem38b	52076
10587746	transmembrane protein 41B	Tmem41b	233724
10600597	transmembrane protein 47	Tmem47	192216
10428827	transmembrane protein 65	Tmem65	74868
10515326	transmembrane protein 69	Tmem69	230657
10486499	transmembrane protein 87A	Tmem87a	211499
10475912	transmembrane protein 87B	Tmem87b	72477
10546586	TATA element modulatory factor 1	Tmf1	232286
10595000	tropomodulin 3	Tmod3	50875
10396161	thioredoxin-related transmembrane protein 1	Tmx1	72736
10457183	thioredoxin-related transmembrane protein 3	Tmx3	67988
10472050	tumor necrosis factor alpha induced protein 6	Tnfaip6	21930
10455647	tumor necrosis factor, alpha-induced protein 8	Tnfaip8	106869
10436348	translocase of outer mitochondrial membrane 70 homolog A (yeast)	Tomm70a	28185
10478196	topoisomerase (DNA) I	Top1	21969
10390707	topoisomerase (DNA) II alpha	Top2a	21973
10412844	topoisomerase (DNA) II beta	Top2b	21974
10579872	tumor protein D52	Tpd52	21985
10448202	tropomyosin 4	Tpm4	326618
10345930	tripeptidyl peptidase II	Tpp2	22019
10350535	translocated promoter region	Tpr	108989
10438621	transformer 2 beta homolog (Drosophila)	Tra2b	20462
10603166	trafficking protein particle complex 2	Trappc2	66226
10518167	trafficking protein particle complex 2 /// predicted gene 13080 /// similar to Chain A, The Crystal Structure Of The Bet3-Trs31-Sedlin Complex	Trappc2 /// Gm13080 /// LOC100044633	66226 /// 666049 /// 100044633
10400538	trafficking protein particle complex 6B	Trappc6b	78232
10414911	T cell receptor alpha variable 13D-4 /// T cell receptor alpha variable 13N-1 /// T cell receptor alpha variable region 13-3 /// predicted gene, OTTMUSG00000015222 /// T cell receptor alpha variable 13-4/DV7	Trav13d-4 /// Trav13n-1 /// Trav13-3 /// OTTMUSG00000015222 /// Trav13-4/dv7	639655 /// 100042568 /// 432910 /// 640931 /// 100113412
10480224	tRNA aspartic acid methyltransferase 1	Trdmt1	13434
10362420	triadin	Trdn	76757
10362428	triadin	Trdn	76757
10362434	triadin	Trdn	76757
10415784	tripartite motif-containing 13	Trim13	66597
10406953	tripartite motif-containing 23	Trim23	81003
10566358	tripartite motif-containing 30	Trim30	20128
10494924	tripartite motif-containing 33	Trim33	94093
10485395	tripartite motif-containing 44	Trim44	80985
10402225	thyroid hormone receptor interactor 11	Trip11	109181
10356194	thyroid hormone receptor interactor 12	Trip12	14897
10594561	thyroid hormone receptor interactor 4	Trip4	56404
10368511	tRNA methyltransferase 11 homolog (S. cerevisiae)	Trmt11	73681
10540391	tRNA nucleotidyl transferase, CCA-adding, 1 /// cereblon	Trnt1 /// Crbn	70047 /// 58799
10546775	tRNA nucleotidyl transferase, CCA-adding, 1 /// cereblon	Trnt1 /// Crbn	70047 /// 58799
10487277	transient receptor potential cation channel, subfamily M, member 7	Trpm7	58800
10428534	trichorhinophalangeal syndrome I (human)	Trps1	83925
10357124	translin	Tsn	22099
10494821	tetraspanin 2	Tspan2	70747
10378508	TSR1, 20S rRNA accumulation, homolog (yeast) /// serine racemase /// similar to CG7338-PA	Tsr1 /// Srr /// LOC639384	104662 /// 27364 /// 639384
10385343	tetratricopeptide repeat domain 1	Ttc1	66827
10491438	tetratricopeptide repeat domain 14	Ttc14	67120
10381140	tetratricopeptide repeat domain 25	Ttc25	74407
10446907	tetratricopeptide repeat domain 27	Ttc27	74196
10437080	tetratricopeptide repeat domain 3	Ttc3	22129
10483819	tetratricopeptide repeat domain 30B	Ttc30b	72421
10422718	tetratricopeptide repeat domain 33	Ttc33	67515
10423941	tetratricopeptide repeat domain 35	Ttc35	66736
10406287	tetratricopeptide repeat domain 37	Ttc37	218343
10514128	tetratricopeptide repeat domain 39B	Ttc39b	69863
10496854	tubulin tyrosine ligase-like family, member 7	Ttll7	70892
10404187	TRAF and TNF receptor associated protein	Ttrap	56196
10553568	tubulin, gamma complex associated protein 5	Tubgcp5	233276
10383758	taurine upregulated gene 1	Tug1	544752
10555892	twinfilin, actin-binding protein, homolog 1 (Drosophila)	Twf1	19230
10395312	TWIST neighbor	Twistnb	28071
10419170	thioredoxin domain containing 16	Txndc16	70561
10396064	thioredoxin domain containing 9	Txndc9	98258
10551981	U2 small nuclear RNA auxiliary factor 1-like 4 /// transmembrane protein 149	U2af1l4 /// Tmem149	233073 /// 101883
10586017	uveal autoantigen with coiled-coil domains and ankyrin repeats	Uaca	72565
10546606	ubiquitin-like modifier activating enzyme 3	Uba3	22200
10530910	ubiquitin-like modifier activating enzyme 6	Uba6	231380
10378114	ubiquitin-conjugating enzyme E2G 1 (UBC7 homolog, C. elegans)	Ube2g1	67128
10543686	ubiquitin-conjugating enzyme E2H /// predicted gene 2058	Ube2h /// Gm2058	22214 /// 100039133
10552276	ubiquitin-conjugating enzyme E2H /// predicted gene 2058 /// similar to Ubiquitin-conjugating enzyme UbcH2	Ube2h /// Gm2058 /// LOC100047093	22214 /// 100039133 /// 100047093
10585494	ubiquitin-conjugating enzyme E2Q (putative) 2	Ube2q2	109161
10353288	ubiquitin-conjugating enzyme E2W (putative)	Ube2w	66799
10437942	ubiquitin-conjugating enzyme E2 variant 2	Ube2v2	70620
10540273	ubiquitin-conjugating enzyme E2 variant 2 /// similar to ubiquitin-conjugating enzyme E2 variant 2	Ube2v2 /// LOC635992	70620 /// 635992
10553813	ubiquitin protein ligase E3A	Ube3a	22215
10385361	ubiquitin-like domain containing CTD phosphatase 1	Ublcp1	79560
10486616	ubiquitin protein ligase E3 component n-recognin 1	Ubr1	22222
10472630	ubiquitin protein ligase E3 component n-recognin 3	Ubr3	68795
10404700	UBX domain protein 2A	Ubxn2a	217379
10349512	UBX domain protein 4	Ubxn4	67812
10416793	ubiquitin carboxyl-terminal esterase L3 (ubiquitin thiolesterase)	Uchl3	50933
10350489	ubiquitin carboxyl-terminal esterase L5	Uchl5	56207
10498160	ubiquitin-fold modifier 1	Ufm1	67890
10571621	UFM1-specific peptidase 2	Ufsp2	192169
10505187	UDP-glucose ceramide glucosyltransferase	Ugcg	22234
10530201	UDP-glucose dehydrogenase	Ugdh	22235
10422348	UDP-glucose glycoprotein glucosyltransferase 2	Uggt2	66435
10384579	UDP-glucose pyrophosphorylase 2	Ugp2	216558
10409396	ubiquitin interaction motif containing 1	Uimc1	20184
10469083	UPF2 regulator of nonsense transcripts homolog (yeast)	Upf2	326622
10523206	USO1 homolog, vesicle docking protein (yeast)	Uso1	56041
10506118	ubiquitin specific peptidase 1	Usp1	230484
10535739	ubiquitin specific peptidase 12	Usp12	22217
10457409	ubiquitin specific peptidase 14	Usp14	59025
10372965	ubiquitin specific peptidase 15	Usp15	14479
10436708	ubiquitin specific peptidase 16	Usp16	74112
10436561	ubiquitin specific peptidase 25	Usp25	30940
10389339	ubiquitin specific peptidase 32	Usp32	237898
10374621	ubiquitin specific peptidase 34 /// AHA1, activator of heat shock protein ATPase homolog 2 (yeast)	Usp34 /// Ahsa2	17847 /// 268390
10503551	ubiquitin specific petidase 45	Usp45	77593
10556350	ubiquitin specific peptidase 47	Usp47	74996
10501879	ubiquitin specific peptidase 53	Usp53	99526
10437594	ubiquitin specific peptidase 7	Usp7	252870
10475665	ubiquitin specific peptidase 8	Usp8	84092
10598678	ubiquitin specific peptidase 9, X chromosome	Usp9x	22284
10516229	UTP11-like, U3 small nucleolar ribonucleoprotein, (yeast)	Utp11l	67205
10599498	UTP14, U3 small nucleolar ribonucleoprotein, homolog A (yeast)	Utp14a	72554
10389842	UTP18, small subunit (SSU) processome component, homolog (yeast)	Utp18	217109
10522973	UTP3, small subunit (SSU) processome component, homolog (S. cerevisiae)	Utp3	65961
10388971	UTP6, small subunit (SSU) processome component, homolog (yeast)	Utp6	216987
10453721	WW domain containing adaptor with coiled-coil	Wac	225131
10518805	vesicle-associated membrane protein 3	Vamp3	22319
10351119	vesicle-associated membrane protein 4	Vamp4	53330
10607952	vesicle-associated membrane protein 7	Vamp7	20955
10452470	vesicle-associated membrane protein, associated protein A	Vapa	30960
10414113	wings apart-like homolog (Drosophila)	Wapal	218914
10495416	vav 3 oncogene	Vav3	57257
10600524	von Hippel-Lindau binding protein 1	Vbp1	22327
10421840	WW domain binding protein 4	Wbp4	22380
10601854	WW domain binding protein 5	Wbp5	22381
10501608	vascular cell adhesion molecule 1	Vcam1	22329
10410931	versican	Vcan	13003
10446693	WD repeat domain 43	Wdr43	72515
10599032	WD repeat domain 44	Wdr44	72404
10495343	WD repeat domain 47	Wdr47	99512
10424221	WD repeat domain 67	Wdr67	210544
10475362	WD repeat domain 76	Wdr76	241627
10556266	WEE 1 homolog 1 (S. pombe)	Wee1	22390
10413482	wingless-related MMTV integration site 5A	Wnt5a	22418
10466441	vacuolar protein sorting 13A (yeast)	Vps13a	271564
10586616	vacuolar protein sorting 13C (yeast)	Vps13c	320528
10369604	vacuolar protein sorting 26 homolog A (yeast)	Vps26a	30930
[truncated: 704 more rows]
