# Supplementary material for: Plasma Cholesterol–Induced Lesion Networks Activated before Regression of Early, Mature, and Advanced Atherosclerosis
Source: PLoS Genet. 2014 Feb 27;10(2):e1004201. doi: 10.1371/journal.pgen.1004201 (PMC3937269; doi:10.1371/journal.pgen.1004201)
Supplement: Table S5 — Regression reactive genes at week 30. (XLSX) [file pgen.1004201.s007.xlsx]

## Sheet: Sheet1
Table S5. Regression reactive genes at week 30
Transcript Cluster ID	Gene Title	Gene Symbol	Entrez Gene ID
10441787	antisense Igf2r RNA	Airn	104103
10414065	annexin A8	Anxa8	11752
10556463	aryl hydrocarbon receptor nuclear translocator-like	Arntl	11865
10447566	ATP synthase, H+ transporting, mitochondrial F0 complex, subunit c (subunit 9), isoform 2	Atp5g2	67942
10562637	cyclin B1 /// predicted gene 5593	Ccnb1 /// Gm5593	268697 /// 434175
10593015	CD3 antigen, gamma polypeptide	Cd3g	12502
10517165	CD52 antigen	Cd52	23833
10492964	CD5 antigen-like	Cd5l	11801
10538993	CD8 antigen, alpha chain	Cd8a	12525
10538979	CD8 antigen, beta chain 1	Cd8b1	12526
10357472	chemokine (C-X-C motif) receptor 4	Cxcr4	12767
10553092	D site albumin promoter binding protein	Dbp	13170
10463123	deoxynucleotidyltransferase, terminal	Dntt	21673
10388461	cytochrome c oxidase, subunit VIIc pseudogene /// cytochrome c oxidase, subunit VIIc	Gm10012 /// Cox7c	100043160 /// 12867
10414078	predicted gene 10335 /// ribosomal protein L23a pseudogene /// predicted gene 3940 /// ribosomal protein L23a	Gm10335 /// Gm4851 /// Gm3940 /// Rpl23a	100039571 /// 227054 /// 100042634 /// 268449
10373452	predicted gene 129	Gm129	229599
10470305	ribosomal protein L7a pseudogene /// ribosomal protein L7a pseudogene /// predicted gene 4978 /// predicted gene 5619 /// ribosomal protein L7a pseudogene /// ribosomal protein L7a pseudogene /// similar to ribosomal protein L7a /// ribosomal protein L7A	Gm16375 /// Gm5044 /// Gm4978 /// Gm5619 /// Gm6347 /// Gm4970 /// LOC677073 /// Rpl7a	674419 /// 268795 /// 244913 /// 434426 /// 622727 /// 243872 /// 677073 /// 27176
10476441	predicted gene 3550 /// ribosomal protein L29 pseudogene /// predicted gene 6344 /// ribosomal protein L29	Gm3550 /// Gm5443 /// Gm6344 /// Rpl29	100041859 /// 432721 /// 622707 /// 19944
10428576	predicted gene 4294 /// ribosomal protein L15	Gm4294 /// Rpl15	100043209 /// 66480
10491730	predicted gene 8618 /// ribosomal protein S23	Gm8618 /// Rps23	667414 /// 66475
10484357	predicted gene 9294 /// ribosomal protein S4, X-linked	Gm9294 /// Rps4x	668668 /// 20102
10566254	hemoglobin, beta adult major chain /// hemoglobin, beta adult minor chain	Hbb-b1 /// Hbb-b2	15129 /// 15130
10408081	histone cluster 1, H1b	Hist1h1b	56702
10403978	histone cluster 1, H2bm /// histone cluster 1, H2bk /// histone cluster 1, H2bh /// histone cluster 1, H2bc /// histone cluster 1, H2bf /// histone cluster 1, H2bj /// histone cluster 1, H2bn /// histone cluster 1, H2bl /// predicted gene, OTTMUSG00000013203 /// H2b histone family member	Hist1h2bm /// Hist1h2bk /// Hist1h2bh /// Hist1h2bc /// Hist1h2bf /// Hist1h2bj /// Hist1h2bn /// Hist1h2bl /// RP23-38E20.1 /// LOC665622	319186 /// 319184 /// 319182 /// 68024 /// 319180 /// 319183 /// 319187 /// 319185 /// 665596 /// 665622
10481627	lipocalin 2	Lcn2	16819
10414360	lectin, galactose binding, soluble 3	Lgals3	16854
10583056	matrix metallopeptidase 12	Mmp12	17381
10384044	myosin, light polypeptide 7, regulatory	Myl7	17898
10358476	proteoglycan 4 (megakaryocyte stimulating factor, articular superficial zone protein)	Prg4	96875
10350516	prostaglandin-endoperoxide synthase 2	Ptgs2	19225
10485372	recombination activating gene 1 /// RIKEN cDNA B230118H07 gene	Rag1 /// B230118H07Rik	19373 /// 68170
10503249	ribosomal protein L13	Rpl13	270106
10406250	ribosomal protein L37a	Rpl37a	19981
10516479	ribosomal protein S28	Rps28	54127
10493812	S100 calcium binding protein A4	S100a4	20198
10563597	serum amyloid A 3	Saa3	20210
10398075	serine (or cysteine) peptidase inhibitor, clade A, member 3N	Serpina3n	20716
10523717	secreted phosphoprotein 1	Spp1	20750
10513818	stathmin 1	Stmn1	16765
10598976	tissue inhibitor of metalloproteinase 1	Timp1	21857
10390707	topoisomerase (DNA) II alpha	Top2a	21973
10501608	vascular cell adhesion molecule 1	Vcam1	22329
10338109	---	---	---
10338232	---	---	---
10339998	---	---	---
10341109	---	---	---
10341479	---	---	---
10342953	---	---	---
10342974	---	---	---
10343112	---	---	---
